# Supplementary material for: Analysis of Differentially Expressed Genes in Osteonecrosis of Femoral Head, Osteoarthritis, and Rheumatoid Arthritis by Integrated Microarray Analysis
Source: Research Square preprint supplement (doi:10.21203/rs.3.rs-877622/v1), 2021-10-22
Supplement: Supplementary file 1 [file 75e947d2f907b6fd3e64f92a.docx]

| ONTOLOGY | ID | Description | GeneRatio | BgRatio | pvalue | p.adjust | qvalue |
| --- | --- | --- | --- | --- | --- | --- | --- |
| BP | GO:0043062 | extracellular structure organization | 12/56 | 422/18670 | 3.46e-09 | 4.56e-06 | 3.76e-06 |
| BP | GO:0030198 | extracellular matrix organization | 11/56 | 368/18670 | 1.01e-08 | 6.66e-06 | 5.50e-06 |
| BP | GO:0030199 | collagen fibril organization | 5/56 | 54/18670 | 5.72e-07 | 2.51e-04 | 2.07e-04 |
| BP | GO:0031102 | neuron projection regeneration | 5/56 | 59/18670 | 8.95e-07 | 2.95e-04 | 2.43e-04 |
| BP | GO:0032963 | collagen metabolic process | 6/56 | 115/18670 | 1.21e-06 | 3.19e-04 | 2.63e-04 |
| CC | GO:0005583 | fibrillar collagen trimer | 5/58 | 11/19717 | 8.42e-11 | 4.80e-09 | 3.90e-09 |
| CC | GO:0098643 | banded collagen fibril | 5/58 | 11/19717 | 8.42e-11 | 4.80e-09 | 3.90e-09 |
| CC | GO:0098644 | complex of collagen trimers | 5/58 | 19/19717 | 2.08e-09 | 7.91e-08 | 6.42e-08 |
| CC | GO:0005581 | collagen trimer | 6/58 | 87/19717 | 2.09e-07 | 5.95e-06 | 4.83e-06 |
| CC | GO:0062023 | collagen-containing extracellular matrix | 10/58 | 406/19717 | 2.65e-07 | 6.05e-06 | 4.91e-06 |
| MF | GO:0048407 | platelet-derived growth factor binding | 4/55 | 11/17697 | 2.71e-08 | 5.12e-06 | 4.05e-06 |
| MF | GO:0030020 | extracellular matrix structural constituent conferring tensile strength | 5/55 | 41/17697 | 1.66e-07 | 1.57e-05 | 1.24e-05 |
| MF | GO:0005201 | extracellular matrix structural constituent | 7/55 | 163/17697 | 6.92e-07 | 4.36e-05 | 3.45e-05 |
| MF | GO:0005178 | integrin binding | 5/55 | 132/17697 | 5.52e-05 | 0.003 | 0.002 |
| MF | GO:0002020 | protease binding | 4/55 | 128/17697 | 6.69e-04 | 0.025 | 0.020 |
| KEGG | hsa04926 | Relaxin signaling pathway | 7/32 | 129/8076 | 5.44e-07 | 6.20e-05 | 5.56e-05 |
| KEGG | hsa04974 | Protein digestion and absorption | 6/32 | 103/8076 | 2.57e-06 | 1.47e-04 | 1.31e-04 |
| KEGG | hsa04933 | AGE-RAGE signaling pathway in diabetic complications | 5/32 | 100/8076 | 4.07e-05 | 0.002 | 0.001 |
| KEGG | hsa04512 | ECM-receptor interaction | 4/32 | 88/8076 | 3.75e-04 | 0.011 | 0.010 |
| KEGG | hsa04611 | Platelet activation | 4/32 | 124/8076 | 0.001 | 0.031 | 0.028 |
