# Supplementary material for: Analysis of Differentially Expressed Genes in Osteonecrosis of Femoral Head, Osteoarthritis, and Rheumatoid Arthritis by Integrated Microarray Analysis
Source: Research Square preprint supplement (doi:10.21203/rs.3.rs-877622/v1), 2021-10-22
Supplement: Supplementary file 2 [file d7e421bdea84b3ed9c0e644e.xlsx]

## Sheet: UP
GSE74089	GSE55235OA	GSE55235RA
c10orf105	cx3cr1	tnfrsf17
arl4c	ltc4s	mzb1
egr2	tppp3	nkg7
lrrc15	plxnc1	pou2af1
il11	ucp2	hla-dmb
amtn	mest	hla-dob
vegfc	hla-dmb	sema4d
rarres1	gal3st4	sdc1
fzd10	wnt5b	jchain
loxl4	mxra5	igll5
prkci	anos1	sel1l3
fap	dab2	cxcl13
coro1c	fcer1a	csk
mmp13	nrep	top2a
tcerg1	c1orf54	adamdec1
gsc	ppic	cotl1
srsf1	sorl1	cd52
postn	csk	traf3ip3
crlf1	mrc2	mxra5
kcnk2	crip1	dock10
ecm1	tnfsf11	ucp2
gjc1	lrrc17	apobec3f
tnfaip6	scrg1	cd247
sox11	nid2	fcgr3b
htra1	dock10	rrm2
msantd3-tmeff1	akr7a2	dpep2
epop	lst1	arhgap25
crtac1	hla-dpb1	cd3d
galnt5	cotl1	vopp1
gfra2	ptgds	mreg
pamr1	oas1	blnk
sgk1	plbd1	tns3
tgfbi	cxcl12	crlf3
col3a1	epyc	cd2
aspn	mgat4c	rtp4
stk38l	tlr7	hk3
procr	golm1	ptpn6
angptl4	dok2	ccl5
s100a4	thy1	lpxn
thy1	sdc1	dok2
znf652	prss23	ptprc
col5a2	b3galnt1	lst1
ogn	slc23a2	rac2
serpinf1	kazald1	osbpl3
ptbp1	c1qtnf3	ccr5
diras1	hla-dqa1	hla-dpa1
tmem200a	copz2	mmp13
rap2a	epb41l2	ptprcap
col6a1	blnk	ncf1
c3orf14	ly86	cd27
igfbp7	trem2	lck
syndig1	calml4	slc12a8
clec3b	jchain	hla-dma
slc24a3	rrm2	pim2
uchl1	dhrs9	ccdc102b
thoc1	fuca1	hla-dpb1
hilpda	rac2	ndc80
sulf1	cxadr	icam3
mall	adamtsl3	alox5
rgs16	csf1r	klrd1
ackr3	bgn	p2rx5
adcy7	cd52	aqp9
crebbp	olr1	rnaset2
mt1f	kdelr3	rassf2
adm	nap1l3	arpc1b
rnf214	lta4h	plbd1
cbln4	pla2g15	lilrb1
epyc	cbx6	dpysl3
pdgfd	tyrobp	nrep
gfpt2	flrt2	dhrs9
dsp	enc1	il21r
ndc1	islr	aim2
cilp2	sulf1	hla-drb5
slc7a2	vkorc1	btn3a3
spp1	hpgds	lilrb4
nkapd1	osbpl3	nckap1l
nanos1	pycard	cep55
zfp36l2	ephb2	nusap1
hbegf	tns3	itgal
acot7	col3a1	ly86
gli1	thbs4	coro1a
fstl1	tril	gfra2
col6a2	aif1	lilrb3
slc16a10	syk	lilrb2
cacna1a	znf423	fkbp11
soat1	cyba	cd79a
tmem100	hla-drb5	csf1r
klf2	slc5a3	prkcb
serpinh1	glt8d2	prdx4
sqor	timp1	aif1
nfil3	scara3	crybg1
plod2	adap2	thy1
mamdc2	slc18a2	calml4
lef1	fbp1	mx2
itga11	rai1	lcp1
tpm4	rnaset2	cd6
radil	cd2	gsap
hmgxb3	guca1a	slamf7
mt1h	arrb1	smco4
ca13	col14a1	itgb2
srpx2	ncf1	itga4
slc2a3	lgmn	sorl1
loxl3	hla-dpa1	c1qa
lrrcc1	pcolce	oas1
errfi1	l1td1	hla-dra
metrnl	top2a	lrrc15
hoxc8	gas2l1	septin6
ankrd39	gamt	cklf
b3gnt2	lipa	naga
galnt4	cfi	kif20a
man2a1	abcc3	adam28
rftn1	c2	marcks
hacd4	arhgef40	psmb9
epb41l3	ssr4	flrt2
mt1g	sgcd	ltb
ltbp1	jmjd4	cxcl10
fem1b	nagk	lgals2
gab1	col5a1	nid2
micos10-nbl1	sema3c	il7r
mpp7	lrrc15	cst7
psph	rcn3	lap3
cln8	crabp2	sdc3
rora	angptl2	selplg
col5a1	tdo2	arhgdib
ubash3b	mmp1	btn3a1
fam110b	lgi2	ada2
znf417	btn3a3	arhgef18
tyms	sel1l3	samsn1
fndc10	btn3a1	dazl
mfsd14b	col5a2	crip1
mafb	nbl1	kmo
nudcd1	pcyt1b	il32
cemip	hk3	bmp2k
rexo2	dock4	aplnr
sema3a	gabra4	fcgr1b
col1a1	cd28	plxnc1
thbd	sema3a	myo1f
cnn3	ahr	plcg2
gstm5	sv2b	sell
fkbp1b	kif20a	lta4h
saysd1	ada2	parp12
crat	uba7	gzma
tnfsf9	socs6	ctsh
marveld1	mmp9	cd86
gas1	rhobtb1	syk
add3	enah	ddx58
dner	galnt1	mmp1
shc4	ap4m1	rasgrp1
rabac1	ogn	ikzf1
pgm2l1	col1a2	plaat4
vegfa	rtn1	pttg1
gja1	vegfc	il10ra
ccdc3	fap	lamp3
p3h2	pomt1	pycard
chst2	sparc	resf1
adprh	lipc	clec10a
chd7	lair1	plek
prss23	mcoln3	cd48
s100a10	ttc3	gzmb
bend6	atp6v0e2	clec7a
tmem161a	pnma8a	dock4
papss2	ikzf1	pilra
glrx2	cebpa	prf1
ppp2r3c	pcdh12	apobec3c
klf9	coro1a	slamf8
ccl3	ankh	lax1
gsdmb	rarg	klrb1
gnai2	ccdc102b	fyb1
appl1	ptprc	snx10
pid1	capg	slc7a7
pgam1	sell	acp2
apcdd1l	arhgap25	col3a1
tspo	sema3b	ly96
hnrnpl	fscn1	hck
col15a1	hirip3	aspm
rgs2	rtp4	bcl11b
pim1	c1qa	nfe2l3
dscaml1	gm2a	ube2l6
arf6	ptn	c1orf54
fnip2	ttll1	olfml2b
bfsp1	vash1	golm1
gjb2	tnfrsf11a	lcp2
p4ha1	nkg7	arhgap15
col18a1	mtus2	gmfg
tsc22d3	pbk	ephb2
ints3	olfml2b	mnda
slc39a8	gpr65	adcy7
id2	folr2	ppp1r16b
ptges	ddx60	cd300c
slc2a14	aplnr	cytip
smim29	mnda	tmem176b
ppp1cc	traf3ip3	runx3
ngef	me2	cyba
omd	casp1	cd180
rtn4	arhgap15	arpc5
mkx	pthlh	enc1
kbtbd13	znf528	rps6ka1
mrc2	cbr3	ddx60
xrcc4	ttc9	timp1
socs3	ccn3	tlr7
cyp27c1	sacs	cd14
tpd52	adgra3	ctsb
syncrip	vav1	mapk13
unc5b	ptgs1	gbp1
grn	ciita	cd8a
emp3	sdc3	pstpip1
emp1	itga4	cybb
lypd5	shisal1	nmi
pitx2	hla-dma	itgb7
spsb1	gabrb1	arap2
col1a2	selplg	trat1
klf4	tmem51	btk
cd151	kif4a	ubd
ror1	tnfrsf25	atox1
egln1	dpysl3	fcn1
glrx	arhgef9	casp1
lmtk3	atp13a2	ssr4
mxra5	tbl1xr1	mki67
focad	atm	lyz
arf5	wnt5a	rtn1
metap1d	itgb2	gpr65
thbs3	shcbp1l	pbk
fbl	marcks	lrmp
ubac2	tapbpl	rbm47
usp3	rag1	rfx5
p2ry6	ltb	isg20
prg4	pou2af1	cd74
ube2m	emp3	mast1
tnc	st8sia4	col5a1
sort1	per3	stat1
ptgs2	hck	btn3a2
p3h4	sema4d	dpp3
lgals1	tspan2	tent5c
aopep	ifi30	itm2c
ppic	clec4a	prss23
bbs12	cybb	adap2
mt2a	lilrb4	nlgn4x
bhlhe40	fcgr1b	cx3cr1
c1galt1	ccr5	btn2a2
bloc1s5-txndc5	slc38a4	themis2
mvp	adcy7	gzmh
nnmt	nell1	idh2
lum	gap43	col1a2
grk2	cd180	tpd52
c11orf96	kcnn4	entpd1
prpf39	slc46a3	psmb8
mapre2	col1a1	cdk5
galnt2	tmco3	man2b1
ugdh	dock2	tmem104
tmem45a	trim14	adgre2
pdgfrl	hla-drb1	stk10
rdh11	nkx3-2	aoah
fsd1	lilrb2	vav1
anxa1	c14orf132	tacc3
spry1	lama4	atp2a3
glud2	lrmp	il2rg
tbc1d8b	prr5l	gimap6
mt1a	gpr1	col5a2
rgcc	arhgap22	col1a1
abcb4	oas2	ctss
atp6v1h	cd74	2021-03-01
birc6	plgrkt	tyrobp
asap1	cacna1d	iqgap2
ivns1abp	dpep2	cxcl6
ralgps1	ccl5	fcgr2b
ptpdc1	c7orf25	dock2
atp5mc3	btc	hla-dqa1
ezr	cep55	ncf2
uqcrh	itgbl1	hirip3
znf138	dpt	hla-drb1
morf4l1	cd82	shcbp1
nanos3	fdxr	micb
gpr171	npl	ncf4
rpf2	cpa3	cd3e
vcam1	kcnma1	bin2
traf5	syt17	gng7
fam162a	icam3	folr2
tmem14a	clu	slc46a3
garem1	prepl	pnoc
dck	msr1	melk
nt5e	eml1	lbr
uap1	pkia	txndc5
serpine2	htr2b	rhoh
fosb	tpsb2	ifi30
h3f3a	gper1	fcgr3a
ikbip	mrps34	pvrig
kiaa0040	bex3	nagk
ap2s1	epha3	fap
itgb4	xylt1	cr1
mfap4	zbed8	kif4a
stx7	pilra	kynu
sbno2	cpvl	ccr7
ptgfr	slc12a8	batf
syt17	kcna1	ccr1
fzd6	tpsab1	trim22
thop1	zbtb14	ido1
rnd3	zscan26	nr1h3
c8b	fkbp11	fbp1
adgrg2	pdgfc	fcmr
ppt1	znf671	apol1
prxl2a	csf2ra	cyfip2
angptl2	cln6	chn1
fjx1	hcfc1r1	nup210
cdk2ap1	vcan	dennd1b
ubxn1	olfml1	slc36a1
lox	usp46	ggh
ptx3	rab23	cxcl9
col2a1	rmi1	ca2
ccm2	kif11	cpvl
eif1	plekha2	c2
gnb5	plaat4	st6gal1
cd109	myh4	lgmn
nelfa	btn3a2	ccr2
sbsn	clec7a	smpdl3a
cgref1	rnasel	aga
bmp6	adgrb3	gpr137b
pfkp	fcgr3a	wnt5a
dysf	exoc2	capg
naga	ryr2	adam12
slc39a13	znf688	clec4a
ncor2	dpys	dck
ero1a	ltbp3	slf2
c1qtnf7	ank3	cd38
shisa2	ndc80	bcl2a1
nemp1	arvcf	lef1
stag1	bscl2	atm
znf395	alad	hpse
igf1r	aste1	tdo2
pim3	cln8	tcl1a
cd8b	gchfr	trim14
ufm1	itgal	ccl18
ctsf	tmem106c	fcgr1a
rab38	atxn1	plac8
sh3d19	spdl1	map4k1
ipo8	antxr1	gap43
igfbp4	pwwp3a	tapbpl
cisd2	fadd	h2afy2
anos1	ifi27	gpr171
cntd1	tpx2	laptm5
heatr5a	igfbp5	ctsc
tns1	cbr1	tk1
arpc3	dennd1b	ckap2
znf438	smarcal1	scn9a
ccdc117	znf668	dlgap5
p4ha2	herc4	c7orf25
prkag2	cd37	irf8
msx1	flnb	rhobtb1
ccdc80	gpm6a	eaf2
wdr70	cdkn2b	siglec1
adora2b	gria2	cd72
znf415	prmt7	pde6d
itih6	plec	igll1
eaf2	tk1	abcc3
hhipl1	pvalb	ly9
lonp2	znf135	abcc4
fscn1	ptprj	klrc1
emilin1	lyz	kif11
plekha1	znf780b	evi2a
ldha	fndc3a	csf2rb
dnajc25	tnfsf15	cd37
caprin1	pagr1	s100a9
slc16a3	lilrb3	jak2
pdia5	mfsd13a	gtse1
plekha7	tmem104	kcnn4
pla2g4a	nqo2	ncapg
stab1	penk	itk
eif3h	rpe65	apobec3b
ldlrad4	gask1b	tppp3
cavin3	fmo1	marco
rap1a	tac1	pax5
smim3	rgs13	ms4a1
phactr2	scg2	coro7
slc25a17	apobec3f	fcgr2a
slc2a9	itpkb	cd19
sh3pxd2b	nudt11	lair1
itgb5	bmp2k	st14
vps41	cd300a	msx2
usp16	vcam1	galnt6
depp1	fancf	ccna2
hist2h3d	fpr3	dnajc12
fam122b	bcl7c	p2ry6
pdia4	mast3	marcksl1
trim59	lrp3	plppr4
ergic1	orc1	slc15a3
pttg1ip	ifit1	cdk1
slc25a6	btg4	cnpy3
mtmr11	znf112	sectm1
trim66	samsn1	tlr1
cd46	apoe	fam49b
col6a3	slc5a2	rmi1
tgoln2	lck	dtl
clec11a	igll5	gzmk
sugt1	vcpip1	psmb10
kank2	mmp13	ifi27
itgav	csn1s1	psme2
znf423	bank1	xaf1
nfatc4	znf74	mdk
ncl	hspg2	cdcp1
jmjd4	rab38	cd300a
dll1	zkscan4	slc2a6
znf197	myom2	zap70
tram1	nol4	npl
ppp3cc	mmp3	tnfsf15
crip1	rimbp2	rassf4
rps5	klhl4	tspan13
noa1	abca3	plekhb2
stk24	hla-dra	fzd2
morc4	il11ra	shtn1
pfkfb4	jak2	fpr3
vegfb	semg2	def6
dars2	p3h2	sema4a
rps27l	zkscan7	plekho1
fxyd6	agpat4	gnly
hoxc9	stap1	itgax
mxi1	mme	syngr2
cybrd1	fggy	crtam
plat	naip	cxadr
tmem119	aspm	tnfsf10
map3k3	elovl4	scnm1
camkk1	lrp1b	nudt1
fn1	psph	atp6v0e2
capza2	gpr88	znf74
sec11a	znf711	ppcdc
tnfrsf10b	daz4	p2rx7
itgb1bp1	ndufa4l2	pla2g7
capn2	ush2a	naip
arg2	gramd1c	pla2g2d
tubb6	st8sia1	per3
col13a1	vamp8	dpt
schip1	sspn	ptpn7
ndufs5	sytl2	cbr1
ewsr1	lilrb1	gca
rab15	rras	lxn
slfn11	marco	st8sia4
pgm3	aoah	tmem51
mcu	creb3l1	evi2b
pgk1	lyl1	aspn
pkn3	tnfrsf11b	nup43
podnl1	cog7	smarcal1
kif1b	cdk5	acap1
lamb3	tenm3	vamp8
dstn	nox5	mad2l1
oaf	scube2	gata3
ubtd2	slco2b1	csf2ra
lhfpl6	dnali1	ccr6
zfyve16	p2ry13	znf107
mgst3	mstn	trem2
kiaa0408	snx17	tpx2
ncs1	mdk	olr1
tmem189	dnase1l3	cfp
anxa4	or1e2	cemip
tmsb15b	sncaip	tnfsf11
nap1l1	dlgap5	st8sia1
cd55	calcb	cxcl11
nfe2l1	rsph6a	hs3st3a1
cnih4	p2rx7	tlr8
aldoa	p3h4	lrrc17
ndrg4	nudt1	mmp9
ddx3y	tbxas1	brwd1
c4orf47	arrb2	pkia
dgkd	hla-dqb1	fmnl1
prrx2	loxl1	il2ra
ndrg1	sil1	rasgrp3
pxylp1	lfng	oas2
loxl2	nagpa	jmjd4
plag1	hist1h2ak	cd53
bzw2	nudt6	mmp3
acot9	nynrin	prdm1
pgam4	bin2	lilra6
rock2	tex13a	isg15
galnt3	ykt6	ror2
zbtb1	tnip3	c11orf80
dlx4	lipf	ttc9
ankrd37	slc2a11	plgrkt
vim	glrb	gimap4
glud1	tnfsf12	aste1
heg1	ppp1r1a	dapp1
adgre5	zic3	hla-dqb2
glipr1	lmo7	abhd3
sap30	plekha4	birc3
slc25a3	fam155a	cldn7
cdhr4	ehhadh	pik3cg
nr4a3	cdon	me2
ppp4r4	msantd3	bcl11a
spcs2	spon1	ifit1
smn1	wdr77	camta1
snapc1	stmn2	spint2
actg1	cxcr2	cd33
fli1	fmnl1	alpl
prelid3a	srgap2	sh2d1a
trio	cyp3a7	exoc2
rps6kc1	znf134	znf652
ccnd1	map3k1	vav3
plk3	samd9	qpct
gcfc2	cdh2	s100a8
anpep	hps4	tbc1d31
rbpj	gstz1	olfml1
ndn	susd4	gpr25
scx	sp1	tefm
dcun1d3	dnajc17	gmip
gnai3	tigd6	fgr
ddit4l	rpusd2	slc29a3
cox17	cacna2d3	vegfc
adamts6	sipa1l1	brca1
csnk1e	milr1	acot7
cox4i1	mbl2	lyl1
c4orf3	cpz	xcl1
cys1	acp5	wnt5b
rptor	tdrd3	cryba4
niban2	nthl1	fcer1a
cd81	coq4	zbed2
kdm3b	zic4	ralgps2
edaradd	bst1	dennd2d
dpysl2	igll1	slc16a3
mfsd14a	akap5	loxl1
glis2	arhgap4	arrb2
smc6	trim36	vash1
znf626	mrnip	sit1
safb2	wdr41	ccdc170
meis2	ermap	mrpl35
epas1	wif1	ccl24
timmdc1	clic3	tmem158
cpt1c	erap2	pcdh12
pmm2	cdkal1	p2ry13
cdh19	hs3st3a1	nxpe3
frmd6	gpr171	rcbtb1
eef1b2	zmat5	lins1
sec61b	hpse	sac3d1
efemp1	mdfic	mybl1
mt1b	zbtb3	zkscan4
gprc5a	exoc5	nod2
tmem208	casp6	fadd
has1	aspa	tenm4
retreg1	ptprt	pcsk7
dab2	lman1	dok3
grb10	hsd11b2	ect2
septin10	pde5a	ffar2
btg1	rasgrp1	cln6
inhba	osgepl1	stxbp2
chmp2b	pmepa1	hla-dqb1
glcci1	cst7	pdcd1lg2
kctd15	cemip	atxn1
ppp1r3c	lamc3	mcm10
jag1	klrb1	rad51ap1
cd68	tst	fmo1
poc1b	znf214	fgf9
tmem214	znf280d	apobec3a
olfml2b	hacd3	kcnab3
oaz1	chit1	nrgn
zmym5	gpr85	il7
rab13	ren	lime1
hdhd5	iqch	cd244
txlna	mfsd9	dffb
sh2b2	tas2r10	slamf1
cacna1i	dffb	cxcr4
radx	pou1f1	kcnj6
tmem54	znf813	tex13a
bbs9	btbd2	tmem127
lactb	il18	serpinb10
rab18	lilra2	pf4v1
ccdc151	rasa3	dclre1a
tnfsf8	gatc	ccne1
lman1	mrpl35	tfec
angpt1	tlr8	ano1
scarb2	lins1	spag4
nrk	ms4a1	cd3g
pnp	spp1	cdc20
ccn3	pdzrn4	spi1
nfkbiz	gas1	nlrp3
ndufa4l2	apoc4	vnn2
lonrf1	adgb	gask1b
p4hb	hist1h2bl	arhgap4
galnt16	slc16a4	heatr3
a4galt	ubl4a	ttll1
clmn	zic1	cenpm
trerf1	krtap1-3	spp1
plekha4	cyp2r1	acp5
amfr	cntn6	rnasel
dennd3	egf	cd7
cul4a	cd1c	matk
spata7	zfp30	gramd1c
rcn2	fgf9	bank1
luc7l	spata1	znf671
chml	mybl1	bgn
rab42	slc22a3	slc31a2
sema5a	slc12a1	antxr1
tulp4	tm7sf3	c3ar1
btbd11	znf670	slc15a2
rufy1	tmem144	msr1
tgfbr1	maged4b	ms4a6a
rph3al	mad1l1	mc3r
atp6v0c	mfap2	ly6e
galnt15	ints7	kcna1
sec61g	slc4a10	gemin6
pomt2	minar1	lilra1
gapdh	ppm1h	mchr1
rps6kb2	sohlh2	nup42
p3h3		tep1
tor4a		kif15
wdr41		p2ry10
ngly1		tmem8a
rftn2		kntc1
pxdn		il18
ier5		ccdc88c
tcf3		htr2b
ap2m1		maged4b
rab4a		map11
ndufb4		fancf
sipa1l2		pak1
isg20		znf670
abhd15		lamp5
rnft1		cd24
mrps24		slco2b1
kdm3a		pign
golga7		ccl19
aida		ezh2
tm4sf1		tmem156
abhd14b		pnpla6
eef1a1		nagpa
chp1		arhgap22
myo15a		klhl4
fpgt		rarres2
pfkfb3		znf124
akr1c1		ubash3a
rps19		ogn
rbx1		thsd4
ncbp2		stap1
cers6		cyp27a1
grin3b		prrg3
cmtm3		erap2
nme2		ykt6
syt13		postn
gcgr		il15ra
itgae		ptprt
mzt2b		cd40lg
gpi		znf184
lrrn4cl		rimbp2
frmd4b		crabp2
khdrbs1		c1qtnf3
tuba1b		crygb
tmem101		mtm1
epn1		minar1
tmem260		pdyn
cul4b		cyp2r1
lemd3		samd9
dynlt3		xylt2
cux1		trpm4
adgra3		sst
medag		agpat4
hint1		sfrp4
wdfy3		tnfsf12
prdm10		fdxr
irx3		coq4
tmem30a		map3k1
snx13		ndp
sema4c		rasa4
uqcrq		trim36
pcolce2		cd207
galnt7		spdl1
tnfrsf11b		sipa1
lrp12		psph
plglb1		mettl8
cav1		tspan2
cxcl14		dgkz
prorp		sil1
micall2		acta1
mica		milr1
klhl2		bard1
tcf4		ltc4s
ddit4		ankh
ino80e		vnn1
znf383		zfp30
sik1		cyp3a7
gga2		cxcl1
pkd2		far2
arrdc3		zbed8
dbi		serpinh1
lrrfip2		zwilch
nxpe4		asip
eif1ay		hacd3
plekhg3		poglut1
mtfr1		nkx3-2
zc3h6		slc16a4
rb1cc1		ifi44l
sesn1		kif23
fgfr1op2
washc4
rpsa
clpx
gbe1
suds3
f12
ica1
egln3
kcnmb4
tpi1
mrpl45
krt10
mindy2
lmbrd1
smim32
runx1
borcs5
slc39a9
pts
prune2
naa25
sumo3
bhlhe22
zhx1
dars
nipal3
abi1
atp5po
slc39a14
mif
sat1
ptov1
clic1
ifrd1
cdk6
cox6a1
ankrd12
susd6
ak4
cc2d2a
smox
b3glct
stx8
mmaa
rpl22l1
sntb1
fgfbp2
dkk3
kidins220
galnt10
c11orf24
psap
hbd
colec12
smim26
mphosph8
pcgf3
sema3d
arl2bp
hist3h3
mbp
ppp1cb
maff
rnf2
nid1
ostc
rad21
stx1a
fancg
klf12
tgfb3
lamtor5
pla2g15
nedd8
hgsnat
gadd45b
ganc
jun
hist1h3j
rheb
arap3
lamp2
nipa1
blvrb
arf4
daam1
fbxo32
rps16
pcolce
chsy3
commd2
tnfrsf10d
auh
c1orf54
cyp20a1
rap1gds1
fastk
gli3
mms19
ubfd1
ncstn
fbn1
prkca
atp1b3
mapk8ip3
rplp0
mydgf
mrps36
pcdhb2
iqsec1
rsl24d1
cox7a2
specc1
rubcnl
impdh1
thg1l
aqp1
smug1
c4orf46
impdh2
tor1aip1
eno2
rnpep
stt3b
rab23
c15orf61
pigt
tbc1d19
ucn
pcnp
nudt3
ptpn12
rps6ka3
fam49a
znf808
dmac2l
nags
fzr1
eif2ak3
tmem173
rsph3
commd6
dpy19l1
rpl6
tom1l1
pnrc1
steap1
thbs2
copb2
dtd2
zswim9
aoc3
igdcc4
c1orf21
fam126b
znf630
fam49b
kiaa1324l
nol3
ppp6r2
evl
dapk3
slain2
rps28
ddr2
sparc
h2bfm
atp5md
bud13
alg14
tmem185a
chsy1
anp32e
slc1a1
zfp30
slc25a37
eps15l1
slc25a25
rpl32
ndufc1
sec14l1
hsd11b1l
hnrnpa3
fndc3b
pop7
dennd5b
kdelr1
timeless
piwil4
casp3
akr7a2
abi3bp
rpl18
fbxo41
gmps
slc44a1
myl6
pccb
lss
adal
trem1
antxr1
pura
elovl4
crem
herpud1
galnt1
nup58
cmip
fbxo30
ranbp17
atf4
h2afv
mtap
sumo1
acyp1
ganab
rpl18a
sec24a
plxdc2
extl2
dhrs4l2
psd3
itgb8
ranbp9
ube2b
peli1
tmcc1
mxra7
hdgfl3
iqcj-schip1
pigl
pgm1
rpl13
arl6ip5
eea1
tab2
sec23a
ggps1
trmt61b
c16orf95
tiam1
marcks
ost4
golga3
xkr8
zeb1
kank1
pik3c3
pdk1
sytl2
oxct1
hexd
gask1b
ntn4
ptprd
katna1
dhx40
slc35f5
islr
id1
ecm2
top1mt
mcoln3
ccng2
bag2
adgra2
rps15a
piga
bri3
cdon
elk3
styxl1
rsrc2
tll1
foxd1
kcng1
ctsk
mapk6
aktip
frmd8
tmem263
lrrc8a
sec24b
retreg2
nav1
rbm45
abl1
ints13
uggt2
angptl1
nipa2
mpv17
smad3
oat
apeh
slc17a9
kbtbd2
mbnl1
peg3
mapt
rbm7
dpcd
itgb1
ndufa1
dusp1
calcoco2
srsf4
ppp1r16a
hnrnpll
mtrf1l
pcna
ran
spop
ppfia1
ifi16
mpg
dpysl3
erc1
pabpc1
kcnj12
cep152
serinc1
map3k20
cmpk1
igbp1
dynlt1
rtl3
jam2
mycbp
il17ra
nfkbia
efemp2
abhd5
gsdme
timm9
sumo2
bloc1s6
nup37
nptn
trak2
comp
icam2
gng10
abracl
gls
canx
papolg
kif5c
eif1ax
tril
hand2
ywhab
setd4
hnrnpa1l2
clcn3
cd58
pgm2
s100a2
smim12
epha3
gabarapl2
c20orf194
msrb3
bfar
strap
poli
spon2
dtd1
clstn1
ostf1
tmed2
kcne4
sike1
timp2
usp33
hgs
otulin
selenok
dock4
chkb
mdh1
cd14
ndufb3
cald1
efhd2
gaa
rpl30
slc19a2
gabrb2
prkaa1
atp6v1e2
frk
c1galt1c1
vangl1
tnfsf12
ankrd50
gadd45a
acvr1
nln
pdgfc
smarca5
mtdh
slc25a24
rab1a
rev3l
tmem167a
rpe
rplp2
ube2q2
cbx3
tmem109
pfdn5
pole4
ier3
lamc1
moxd1
bend5
ndufa7
c6orf62
pkm
gnaq
sympk
gsap
zfc3h1
cry2
riok3
gadd45g
mbtps1
ankrd28
rab31
itm2b
prep
top2b
stk11ip
itga5
kdm5b
col8a2
ano6
msl2
churc1
emilin2
c14orf132
camk1d
ccnd2
mafk
pter
mmp1
ca9
smad6
prnp
pdlim7
fbxo33
rcan1
calm2
kif1c
pctp
itpripl2
iars2
fgf2
tmem107
cdk16
hspd1
anxa5
matn3
tdp1
ptpn20
perp
ip6k2
wipi1
arhgap9
gpr68
fmod
rnf130
arhgap44
pnisr
gna12
seh1l
hagh
cthrc1
arhgef6
mfsd6
snrpe
sf3b6
tfdp1
spef2
actr3
bdkrb1
rwdd2a
npdc1
ccdc130
ube2k
loxl1
ankra2
cd276
selenoh
snx7
hspa1b
il17rd
rbm12
fn3krp
znf668
plbd1
alg5
stx6
pcsk4
morc2
hnrnpcl1
tiprl
ggh
tmem259
ubxn2a
arid2
gpx5
rnpepl1
rpn1
ipo9
ap3s2
kif13b
klhdc4
sestd1
fermt2
smad2
vps37d
tmem19
ebf1
decr1
angptl5
f5
gipc1
fgd5
parp16
enox1
zmym4
yipf4
tmem14c
zbtb41
dad1
ypel3
usf2
cars2
hectd2
pcnx1
plekhg4
bnip3
poglut2
sulf2
map7d3
serf1a
sap130
myl12a
trim28
cox7c
ywhag
akap13
rrn3
ndufa5
spg21
znf844
sema3e
taf1d
chst15
rnf139
fbxl4
hmgxb4
slc35a1
trmt112
isy1
heca
zc3h3
zmym2
oga
tspan2
ankrd9
hoxc6
znf675
xpo7
msn
ptma
c5orf51
rpp14
atg5
tpra1
osbpl8
prrc1
actb
taf7
st3gal2
eif4e
nxt2
pex7
lamp1
rbms1
eif2s1
aebp1
ctsb
ap1m1
vps28
plxna3
smc4
uqcrb
cdpf1
abcc5
ube2h
gper1
cbx6
cygb
pcdhb15
rab21
znf608
them6
dmac2
spns2
sod1
abcb7
txn
cln5
sbf2
ccdc71l
tnfsf4
ndufab1
itprip
vamp4
lrrc23
ndufa8
csnk1a1
plcb4
mcub
rrm1
b3gnt5
abca9
znf300
mms22l
dixdc1
rpl19
cox16
fnbp4
tasor2
nacc1
srrm1
rhob
sgcb
slc25a12
esyt2
psma2
fbxo4
gstm3
sox9
zc3h7b
fut8
zbtb21
mt1x
rpl23a
pls3
tbc1d5
dlx3
tvp23c
dicer1
znf131
polr2g
fem1c
rpl35a
smim14
itpr3
u2af2
c2orf76
txnl4a
ccdc82
arrdc4
wdr45b
tmed7-ticam2
paics
cd44
pwp1
ppib
insig2
wdfy1
ttc37
vmp1
mkrn1
pank3
cavin1
c1qtnf3
ptgis
atp5pb
arntl2
tbpl1
galnt18
gtdc1
ube2d2
znf654
l3mbtl3
gsk3a
rps4y1
kdelr2
nckap1
pomt1
ikzf5
zfyve1
rnf13
pik3r2
gng11
nol7
relch
akt3
ikzf4
hoxc4
znf706
tma16
ptbp3
mrpl42
clmp
dennd4c
clta
vps13a
nrep
eif3l
endod1
larp7
osbpl7
uvrag
rcor2
fzd1
rab10
vcan
cox7a2l
akr1c2
cadm1
pbx4
brat1
ccar1
atp11b
znf765
fbxo21
hmgb2
rpl7a
evi2a
rgs10
gns
armcx1
agpat5
oscp1
hs2st1
mageh1
elp2
vwc2
rabep2
btbd6
dennd4b
pgrmc1
tmsb4x
rbm8a
rps10-nudt3
ccdc9
myo6
lsm8
mettl3
nrdc
uck2
bmp4
notch2nla
prkar1a
cilp
slc25a26
nbdy
sspn
zxdb
pou2f1
foxi2
chst11
scml1
mgarp
rasa3
nampt
csde1
minpp1
golt1b
sh3glb1
dr1
arhgap10
chrac1
nup160
dag1
lrp10
scrn3
mettl25
dnajc24
dennd5a
cdkn3
snap23
ndufs1
ttc33
mex3c
tmsb15a
sall2
taldo1
gphn
eps15
tm7sf3
znf579
msmo1
gna13
c6orf89
eid2b
vdac2
cdh13
nrip1
stau1
ggcx
dlc1
chd9
hadha
clns1a
cnksr1
dtwd1
ppfibp1
prxl2b
fbxw7
plekha3
pbrm1
skp1
ldlr
efcab7
bbs2
nt5c3b
bcl3
cd2ap
ddx39a
rps4y2
map2k4
ier5l
c8orf88
bdkrb2
ankh
snrpf
prpf38b
mrpl17
hoxb2
slc29a1
mnat1
iffo2
bzw1
yeats4
ogfrl1
vps37c
cdh10
tpst2
oxr1
hnrnpr
stat5b
sccpdh
met
cbl
dok1
rps29
tmbim6
kif16b
sar1b
prkra
magi3
napb
cpsf3
rab8b
ubr3
dcaf16
ticam2
prtfdc1
map2k5
iqcb1
cbr3
clic4
plxnd1
tmx1
hipk3
suclg2
wdr77
scn4b
krtap1-4
wwp2
jmjd1c
rhbdf2
rhot2
sox6
dnajc18
fam107b
igfbp3
degs1
stxbp3
fat1
kdelr3
ap3s1
erlec1
mgat2
nr3c1
rbis
mrpl14
mllt3
rnf144b
cp
c1galt1c1l
etv6
med4
naip
eny2
capn15
gtf3c6
fryl
laptm4a
tnfaip8
stmp1
siah2
sertad3
hebp1
mmp24os
adamts16
znf444
zmym1
cyfip1
tbc1d12
dusp28
set
pole3
zswim8
aven
selenof
ext2
rab22a
nudt9
cxcl5
fxr1
tia1
lrrc56
aco1
lrrc40
igfbp5
katnbl1
ndufc2
znf250
vamp3
bub3
ss18
bbs4
sec31b
card19
kctd12
evc
pcnt
celf2
uqcrc2
rbfa
copb1
ick
ier3ip1
tctn1
rpl10l
usp38
tasp1
ly96
tacc2
lsm14a
parva
xylt2
tex10
mcee
sh3bgrl
sqle
osbpl3
pdgfrb
mid1ip1
cnih3
slc7a1
sertad2
tbca
dock11
smndc1
ptger2
rilpl2
jrkl
dlg1
ppp6r3
rap1b
prepl
ezh2
chic2
ddx18
dlgap4
fnbp1l
ndufb5
atg4c
arsj
prelp
dgcr2
agap3
commd10
kctd3
insig1
chst12
klf6
usb1
c5orf24
mpzl1
tmem64
hnrnpa1
cmss1
spats2l
ssh2
zc3h12b
sox4
pik3ca
zdbf2
mrpl57
amd1
polr2e
dcn
cct4
rars2
hist1h3g
il1r1
ccpg1
noc3l
cdc26
med13
eif4a3
erg
stard13
optn
stxbp1
gng12
tom1
gnai1
morf4l2
stat2
c3orf52
arfgap3
igip
pnma8a
rsbn1l
nbpf1
cep170
rock1
grk3
anks6
tuft1
pde8a
morn4
fam192a
clic6
naif1
stam2
slc25a51
lyplal1
spryd7
ppip5k2
hist1h3c
suz12
cplx1
mcur1
reps1
ndst1
mplkip
cep192
ift52
slc25a36
c1d
tcaf2
dera
pxk
nme1
dync1i2
fam172a
purb
zhx1-c8orf76
ube2e2
dusp12
colgalt2
lsm7
c6orf120
myo1e
col21a1
b3galt4
2021-03-07
ptk2b
gpank1
ttc7b
efcab14
chmp1b
trub1
smad4
armt1
rin2
fam92a
bpgm
rpl7
rnf208
l3hypdh
pten
lifr
cth
pum1
ddx23
mff
c12orf45
sf3b1
baiap2
fads1
psma4
spata18
nmi
senp7
sec24d
sgce
dhx32
tram2
narf
satb2
tent4a
znf484
hebp2
prpf40a
slu7
tmem47
xrn1
slc35f6
mxd1
cct6a
kiaa0895l
trmt10a
pam
irf2bp2
znf277
rars
pum2
pfdn4
s100a6
abhd3
arid1a
hnrnpa0
rpl41
hook2
adamts4
tsen34
rwdd1
luc7l2
jak2
ing3
vcpkmt
yipf5
nrbp2
mmgt1
megf10
znf426
phf3
abhd2
eif3f
r3hdm2
pds5b
hdac3
fam13a
c15orf65
mcmbp
cds2
srp9
ccdc102a
tex26
cfap300
ginm1
smpdl3a
tmco3
pcdhb4
ap5m1
cacfd1
mkrn2
nubpl
cpsf7
pde12
cep162
arl6
hace1
tardbp
rnf152
mzt1
cenpq
ints6l
polr2j3
rbbp4
cyth3
btbd1
notch3
cutc
cib2
crtap
ints8
rab35
cmc1
gins3
haus1
ahr
wipf1
csgalnact2
lypla1
dlg3
sar1a
rif1
gas2
rchy1
bace2
sin3b
tmem181
mamld1
piezo1
ppp1r12a
spast
rint1
cdk14
cnp
ddx3x
fbln2
snip1
tnpo1
hapln3
cdc42se2
sord
chmp5
rab5if
klhdc1
map1lc3b
bbip1
tomm20
mrpl53
twsg1
c17orf75
lrp4
psors1c1
kifap3
metap2
sod3
ctnna1
rabgef1
cd9
tma7
tmem67
rab3gap1
erbin
prph2
sgcd
nup107
cdk2ap2
dmbt1
nemf
adcy9
hprt1
spesp1
spin1
rpl39l
ryk
cpox
uchl5
znf280c
mex3a
efl1
phtf1
erich1
phc3
cdo1
borcs7
slc31a2
atf1
faf2
dnajb4
plscr1
ubl3
c2cd5
golga8f
gpcpd1
cic
sgtb
ipo5
cpne8
rida
unk
mri1
pogz
foxo3
kpna3
cyp2w1
trim65
rtn4ip1
ptpn2
cdkn2d
itfg1
znf449
nlk
ubxn4
zdhhc9
fbxo10
calr
magel2
wars2
ubtd1
kdsr
lrrc17
rbm3
mcm4
card6
polr1e
c5
hrh1
pex13
atg2b
klf3
znf341
gtpbp4
arl13b
[truncated: 783 more rows]

## Sheet: DOWN
GSE74089	GSE55235OA	GSE55235RA
rnase1	klf9	nfil3
msmp	cebpd	slc19a2
dact1	rhob	klf9
tyrobp	slc19a2	bcl6
tmem176a	fosl2	gadd45a
apod	bcl6	cebpd
chrdl2	gadd45a	adh1b
ctsh	sik1	apold1
saa1	nfil3	atf3
hla-dra	nfkbia	adamts1
hla-drb5	klf4	klf4
hla-doa	maff	sav1
vit	gadd45b	rhob
nkain4	myc	plpp3
cib4	ddit4	fosl2
inpp5j	tiparp	rnd3
apoe	mt1m	zfp36
cdr1	apold1	ccn1
slco2a1	zfp36	zbtb16
shox2	ppp1r15a	cyp4b1
mrpl39	dusp2	ednrb
a2m	cdkn1a	spry2
reln	atf3	tcf7l2
krt73	hnrnpa1	maff
mrpl2	sod2	myc
wfdc2	ier5	fam107a
cox6b2	btg2	maoa
fat3	rpgr	ppp1r15a
krt7	cxcl2	abtb2
wnk2	slc39a14	plin1
tmem171	eif1	angptl7
myoz3	depp1	adm
rnaset2	adm	gadd45b
mt-nd2	adamts1	gpx3
gstt2b	rnd3	tiparp
c4b	btg1	wasf3
sorl1	mthfd2	tgfbr3
extl1	piga	gabarapl1
hla-dqb1	rgs2	cdkn1a
ltbp2	jund	lama2
c19orf33	ccnl1	fosb
rspo3	bag3	fabp4
c1qb	slc16a7	btg2
mt-nd6	tnfaip3	tceal2
cfhr3	slco4a1	apod
hla-drb1	per1	piga
krba1	fam107a	svep1
sftpb	cyp4b1	tns2
cideb	ccn1	agtr1
abca4	nedd9	sfrp1
col10a1	pnrc1	depp1
xirp1	ets2	h3f3b
plaat4	nampt	junb
cfd	fosb	tfpi
lgi4	mt1x	daam2
myo1g	cxcl8	magi2
rab41	adcy2	bzw1
tfr2	klf2	per1
c20orf204	slc2a3	c7
itgam	ccdc59	smad3
tbc1d20	spen	ptgs2
gask1a	mt1f	akr1b10
gdf10	grb10	fhl5
lcp1	il1b	mt1x
kir2dl4	wee1	fndc4
abo	arid5b	c6
napsa	pim1	ghr
bst2	adh1b	pck1
sprr1a	dnajb1	ablim1
folr1	mt1e	egr1
ncr3	apod	mt1m
hla-dpa1	abtb2	mtus1
fam149a	ifrd1	myoc
sftpa2	angptl7	timp4
ccl18	emp1	npas2
gbp6	npas2	bag3
muc6	aass	nova1
cpa3	gabarapl1	ccnl1
inka2	zbtb16	aass
lgals12	vegfa	eif1
hla-dqa1	hmgb2	nr4a2
dgkb	dusp5	adcy2
ifi30	ablim1	tsku
sstr3	nr4a2	klf2
prss36	phc2	abca5
drp2	rrad	tspyl2
cfh	uap1	lep
krtap5-11	tgif1	cdh19
krtap9-1	ptgs2	kcnk3
cd52	irs2	dnajb1
c10orf82	zfp36l2	socs3
hspb9	gpr183	socs2
gpx6	mid1ip1	gdf15
slc52a1	cxcl3	akr1c1
hnf1b	crispld2	ier2
scn5a	ddx21	arid5b
gbp4	glrx	emp1
ly86	pmaip1	irs2
cd74	spry2	map1b
sgca	foxo3	fgf2
hoxd3	zfand5	bhmt2
izumo4	ednrb	zeb1
ttll9	fndc4	gprasp1
ctrb2	klf6	cfd
utf1	h1fx	rrad
mylk	bnip3	sorbs1
mpeg1	stc1	sash1
gcsam	timp4	ddx24
krtap4-12	cebpb	rergl
slc17a7	jun	rhobtb3
acbd7	mtss1	ifrd1
ms4a15	ier2	adh1c
mageb1	hist1h1c	jund
rasgef1c	rnd1	tmem135
foxa3	slc38a1	abhd5
cited2	bzw1	gsn
sftpd	rora	znf395
slc22a17	wasf3	rpgr
sfta3	muc1	nav2
ms4a4a	egr1	scml1
c20orf203	il1r1	cdc42ep4
mdk	junb	foxo3
npvf	zfhx3	zfpm2
heatr9	ccdc69	arhgap8
vsig4	plin2	spock1
cyp1b1	hsd11b1	serpina3
trim39	ogfrl1	ets2
fcn1	duox2	zfhx3
prkcd	siah2	wee1
mier2	gja4	mthfd2
ttc16	gtpbp4	nfkbia
ceacam6	maoa	vegfd
kdm8	inhbb	jun
mrpl43	znf331	il1r1
rspo2	ccl8	lama3
hhla3	map3k8	ltbp4
fam78b	arl4a	slc16a7
reps2	map1b	sox9
golga6l9	plpp3	ebf2
nptx1	tsku	foxo1
dync1i1	mt1h	cfh
kcnv2	lama2	cidec
tcf23	adamts5	ston1
pole	nr1d1	hsd11b1
actl7a	tfpi	bnip3
usp20	cdc42ep3	vgll4
rcan2	nid1	nol3
apoc1	nnmt	pparg
fmo1	spry1	trhde
hexa	mt1g	ddr2
arsf	trib1	mt1e
csta	cited2	sdc4
defb124	tgfbr3	dusp8
tmem63c	magi2	cdo1
alox5ap	myoc	klhl26
iglon5	ddx24	ppl
c2cd4c	has1	ccl25
nox1	peli1	fmo2
tcl1a	slc2a14	slc35f5
tktl1	rbpms	speg
sh3rf2	ccl4	adipoq
scnn1d	zc3h12a	nr4a1
syt5	chd1	cx3cl1
tmem74b	foxo3b	pxdc1
cyp4b1	dusp8	arg2
zdhhc14	phka1	srpx
kcng4	zbtb43	ass1
foxp3	znf395	ntrk2
lbx1	irak3	tmx4
plppr3	arhgap6	foxo3b
pla2g1b	sdc4	hbegf
znf133	cnot8	adh5
slc22a31	sash1	rgs16
cldn10	fhl5	cebpz
vnn1	stk24	acacb
mmp17	tfrc	rbpms
tmem116	slc5a6	efhd1
oprl1	tmem38b	mt1h
abcc8	ell2	akr1c2
exoc3l2	eif2ak3	lmod1
sgta	zfp36l1	nnmt
sftpa1	ldlr	kcnab1
adcy1	mknk2	hif3a
ctxn1	dusp1	olfm1
or51a7	acadl	c1orf21
ccdc187	slc6a8	cnn1
ebf2	adgrg1	mt1f
csf1	id2	stbd1
cela3a	rps6kb1	ppfia2
agr3	socs3	pnpla2
prrg4	lama3	mapk8
tgm7	rev3l	abca8
tk1	rrs1	pid1
neurog3	cdh19	tsc22d1
il18bp	mocs1	dcaf1
nlrp4	spsb1	clk1
c4orf17	csrp2	wnt11
galc	ppargc1a	cbs
stkld1	dyrk3	acadl
gpr3	nr4a1	aoc3
mnda	gch1	tgif1
syn1	ackr1	ldlr
shfl	il6	ereg
phospho1	agtr1	pnrc1
plpp3	plk2	glrx
c3	stbd1	nr1d1
naa11	rgs16	hes1
kank3	arc	rgcc
ccdc57	fkbp5	kcne4
ccnt1	cd69	foxc2
scube1	pex5	ptprg
kcnk17	cldn5	fstl3
ggtlc2	cth	mab21l2
spink7	il15ra	pim1
tmem238	vegfd	sema4c
nyx	dcaf1	ccdc59
mex3d	cep72	sh3bp5
msantd1	ccl3	ier5
ms4a18	foxo4	myh11
gemin7	ier3	mid1ip1
igfbp2	hspa6	adirf
gng7	hnrnpm	tom1l1
alox5	traf3ip2	nlgn1
slc19a1	gata6	dusp1
or4f4	tcim	id4
tas2r43	ak4	foxc1
igf1	pfkfb3	ing1
rsph9	slc6a3	slpi
spats2	hs3st2	ythdc1
pde8b	phactr1	has1
psd	lrch1	rgs2
lmx1b	zmym2	lpl
upk3a	rgs1	rev3l
wdfy4	apob	gem
psors1c2	mfap5	ddx21
cyp39a1	kcne4	tmod1
letm1	pnmt	slc3a2
mettl7a	arntl	olfm4
c9orf131	lonrf1	slc39a14
gpr34	nes	enpp4
odf3	il1r2	chrdl1
spock3	chst7	igfbp6
tspan1	lmod1	slco4a1
znf157	psg7	h1fx
elmod3	tob1	fads3
c19orf67	mlxipl	hist1h2bb
kitlg	gprc5a	gprc5a
fam20a	foxc2	bmp5
negr1	cry1	h2afj
prr36	egln3	pls1
usp18	pla2g2e	znf331
fam181a	slc7a5	npr2
cspg5	nox4	phgdh
rtbdn	fmo2	fads1
grik2	efnb2	cth
c11orf65	klhl26	duox2
krtap10-6	prg2	crlf1
sycp1	akr1b10	prg2
pcp4l1	edn1	peli1
map2k6	h1f0	hmgb2
npy4r	cry2	tbx3
selplg	ptx3	rnase4
spsb4	amph	zfp36l2
shisa7	kcnj8	ramp2
ceacam7	olfm4	yap1
gng13	neurog3	adamts5
pla2g6	ero1b	mknk2
adap2	nr4a3	tob1
hla-dqb2	mcf2l	aoc2
cldn15	cnn1	p2ry2
slc4a8	dcxr	ell2
ect2l	aox1	diaph2
uts2r	pnpla2	osr2
ccdc51	uck2	inhbb
tbc1d3	cdo1	aox1
sphk1	adh1c	hps3
pgp	gpr4	tspan1
atp13a2	ggt5	apob
sstr2	serpine1	atp9a
adam12	ugcg	stk24
pla2g7	ang	pmaip1
syt2	rps4y1	ccnb1ip1
cxcl17	gramd2b	pten
ebf4	ch25h	ang
strn4	tm4sf1	fkbp5
htr6	icam1	tmem47
hgh1	ramp2	pln
upk3b	snai1	sf3b2
adam11	kcnk3	cry2
cd53	ccl20	ppargc1a
gja4	klhl29	gphn
fbxo43	lgalsl	uap1
fam118a	fos	coro2b
rbm15	saa4	gramd2b
gimap1	tead3	fos
aif1	lif	phka1
psrc1	ddx3y	ggt5
olfml2a	acacb	npy1r
thbs4	thbd	tln2
lilra1	pls1	gpc5
rgs5	casq2	tex2
fxyd7	ppif	ddit4
kcnk9	scn3a	lmo3
foxi3	cda	sik1
hla-dmb	lbp	rnd1
hdgfl1	clstn2	gja4
entpd7	nos3	cp
cyp2e1	ccl25	tenm1
myot	qtrt1	ehbp1
hdgfl2	fam110d	nid1
gpc5	usp36	dio3
ppp1r13b	ccl23	ptx3
c11orf53	dusp4	noc4l
tp53aip1	kdm5d	zc3h12a
dstyk	sele	wasl
c11orf21	ecsit	spsb1
prdm16	dpp4	sema3g
ccdc12	c1orf21	amph
sigmar1	pck1	lyve1
spock2	pdk4	neurog3
cyp4f22	p2ry2	cblb
ripk3	mtrf1l	six3
atxn7l2	tmem255a	ndnf
gpn2	stath	per2
xkr4	usp53	pitx1
c9orf64	usp49	cep72
traf4	ereg	zfand5
ppp1r16b	naa15	cited2
ifit1	nup58	slc6a3
ccl24	fosl1	ackr3
lyg2	tsc22d3	cryab
lman1l	s100p	kansl1l
fstl4	tead1	armcx1
klhl35	serpine2	sod2
cldn4	fhod3	spry1
prap1	klhl36	serpina5
dennd1c	usp9y	gpd1
myoc	bccip	bclaf1
septin12	sbno2	smad7
sapcd2	klf13	lipe
znf574	sap30l	scaf4
atoh8	ankrd11	dyrk3
derl3	rarres1	pcolce2
b3gnt9	dnajb14	slc6a8
tctex1d4	nlgn4y	cldn5
nell2	prr16	theg
aqp7	fance	tpd52l1
agt	foxd1	gabra2
ank1	ankrd1	fbln2
sh2d2a		pex5
nppb		wdr60
krtap10-1		klhl21
gtpbp6		ier3
oxt		h1f0
smim22		fah
alx4		tnfsf9
tcn2		lif
ano9		scd
drg2		siglec15
shisa3		spata6l
elp5		gpr20
areg		acsm5
pcp2		pcdh1
gzmm		pcdh9
r3hdml		lgalsl
tgm6		hs3st2
mosmo		nampt
kiaa0930		fzd10
tmem176b		cspg4
nkx2-5		znf230
mafa		phlda1
cyp2a13		tagln
pi3		adgrg2
junb		dcxr
2021-03-09		usp19
sptbn2		dusp5
spata20		cxcl2
mafg		lhcgr
zg16		slc25a37
rgs19		vegfa
slc14a1		fxyd1
irf5		arc
amn		itga7
c1qa		emx2
duoxa1		atp1a2
nfasc		prkg1
c3ar1		psmd11
bcl2l15		taf1c
sncb		bhlhe40
theg		asic3
acp7		tmem100
clec4m		efnb2
otos		sema3e
kif2a		lgr4
hsdl2		stc1
alg6		aqp7
ache		pnmt
il7r		plin2
col7a1		klhl29
spata32		enpp1
fpr2		tox3
phyhip		magea3
defb128		lgr5
hla-dpb1		hspb2
map4k1		sned1
tmem82		tnfrsf10d
phldb2		chst7
ttc22		pcdhb6
csf3r		ackr1
ppp1r1c		saa4
kctd13		adra2a
mmp28		hspb8
zscan30		fer
gpr62		znf574
frzb		macrod1
ccdc61		npy4r
golga7b		hoxc10
rexo1		cldn11
nxf3		mcf2l
marveld2		cda
wnt3a		man1a1
ankar		pla2g2e
kremen2		eif1ay
rnf157		hp
or2h2		retreg1
ada		bmp4
mx2		naalad2
smr3a		pc
oas3		ddx3y
capn13		mnat1
lcn9		col4a5
cd79a		pcdhb12
igsf9		unc5c
lce2b		pdk4
cnga2		brinp3
tinagl1		spata6
hmx3		nlgn4y
dchs2		bcl7a
npr1		chrm3
crygn		snai1
kdf1		nr4a3
or10j5		pemt
ttc36		tead3
ddias		dpp4
c22orf15		fosl1
mon2		gemin4
peli2		slc2a3
tsnare1		bdkrb2
ddtl		scn7a
prdm13		mlxipl
babam1		retn
dcdc2c		rps4y1
slc18a3		camk1d
gpsm3		clstn2
fibcd1		ovgp1
aldh18a1		adh1a
shisa8		guca1b
cc2d2b		gata6
nutm2g		elane
xcr1		chka
hook3		arntl
dhrs13		foxk2
fmo2		irx5
igfbpl1		nes
c12orf56		smim14
prickle3		znrd2
mmrn2		defa1
ccdc177		ccl3
serpini2		scn3a
ccdc50		cilp
mocs3		lifr
gpr139		mt1hl1
boc		slc25a31
magec1		slc9a5
tmem59l		znf580
leng8		tnf
neurod2		tnfrsf10b
mvb12a		tcim
wfdc3		clul1
crlf2		matn3
sebox		usp9y
gp1ba		espn
syce3		akr1d1
scgb1a1		plch2
acss1		magec1
ddn		zic1
c13orf46		slc2a14
prkag3		ikzf5
csag2		hsd17b3
or10g2		angptl4
ltk		tssc4
fmnl3		kcnk1
lrrc26		perp
actrt2		cxcl8
gpr142		pigz
clec4g		fam110d
aldh1a1		gpr3
cdk11a		susd5
chi3l1		trim9
crispld1		adgre3
ggt1		fance
cox6a2		gnrh1
scgb3a2		syce1l
susd3		mlnr
adarb2		tm4sf1
tbc1d28		areg
pik3c2a		casq2
zc3h10		atxn2
morn1		hlf
slc16a9		il6
znf2		htr1f
styx		usp49
nlgn3		las1l
nyap2		slc47a1
pla2g10		adra2c
folr3		comp
tex264		myl9
bmper		tmem255a
alpi		bccip
stpg3		cab39l
c12orf50		stk3
etv3		clic5
ndor1		mgp
prss21		btc
iqgap2		ecsit
lce3d		fam86c1
lair1		prickle3
pyhin1		iqch
tekt2		znf81
cdh22		ano2
igsf6		slc9a3r2
ltb4r2		rrp9
tnf		dusp4
en2		adgrl3
pak4		acadsb
or5h1		mfap4
tas1r2		smtn
hipk4		ccl20
cdk5r2		prrx2
ino80		ccdc68
defb136		fhod3
vps9d1		myom1
sprr1b		gas1
rims4		hacd1
cldn18		mfap5
cd1b		spata7
pramef17		calcrl
olfm2		tnfrsf11b
lrrk1		cxcl3
sppl2b		c9orf153
c3orf22		cfap69
pde3b		rag2
gapt		syt2
pald1		znf674
c1orf116		cyp39a1
rab27b		cybrd1
ccdc103		diras2
cngb1		qtrt1
cryba2		hoxa9
cntd2		rbm10
sfta2		f2rl2
csf2ra
pipox
iqcf6
or51t1
dusp4
s100a8
adamts7
zdhhc19
map1lc3a
tpsab1
capn12
tmem95
ccnl1
ifnl2
tbc1d10b
krt8
relt
acr
ypel1
bex2
pebp4
znf418
tssk2
pip5k1a
pom121l12
cd82
vwa7
aqp12b
otop3
krt26
mrps27
pklr
ibsp
prph
grin2c
ggn
plac8
krtap12-3
adh1c
apoa5
mrgpre
fndc9
krt76
ccdc33
tor2a
hgf
tbc1d14
lime1
esyt3
krtap3-1
fbxl8
mycl
ugt1a6
c19orf53
map3k6
ppp1r9a
trip10
p2rx1
pou3f4
odc1
carns1
defb130a
mcemp1
myh14
cpvl
arrdc1
igsf3
cd163
gpr119
uncx
rtp1
ccm2l
fam236a
chrna4
st18
mcc
zscan2
htr1b
il32
ccl15
slc5a12
hsd11b2
ptp4a3
prpf4
ptafr
ccdc134
cdcp2
slc37a4
krt80
acsbg2
nol6
gpr45
fam25c
lpar2
fam240c
phf21b
carmil2
cisd3
or5k3
gna11
fbxl19
fam219a
bod1l2
or2b6
hoxd9
mrps2
tas2r31
erg28
mal2
neurl1
rpp25
epha10
ssx3
ccl16
zan
pnpla2
kctd16
ube2g2
ifnl1
gyg2
ttll4
acp2
ghsr
or2a2
masp2
c11orf86
frmpd3
spata4
pla2g4f
grb7
trpm3
coro6
tex13b
sla
ocm
krtap5-10
lamp3
csf2
hla-e
bglap
gpr150
ccl26
ntrk2
cwc25
tead3
rtn4rl2
dennd2a
klkb1
rarres2
znf106
rhou
tmem221
unc93b1
c16orf96
krtap5-7
nop10
sytl5
a1bg
kif17
aspg
bsph1
dpf1
stk16
cldn19
ucp3
hif3a
dirc1
znf843
mog
nppa
nfe4
or1n1
clcnka
ctrl
gpr61
magea12
actn2
trappc1
slc22a12
il17f
c12orf40
or5v1
rara
cel
icam4
ppp1r15a
or2a42
zw10
or1b1
ssbp3
gpr152
nlgn1
rita1
pcnx3
cdk3
adgre1
evx1
hcst
itga7
rtp4
gfy
dock3
gspt1
wipf3
opn1sw
wdr97
st6galnac1
kcne1
argfx
trem2
prokr2
znf687
arhgap40
nkx2-8
med11
por
mef2b
dlx2
slc26a4
guca2a
porcn
hoxc11
rfpl4al1
mfsd10
cxcr2
cdx1
shh
cyp21a2
dct
cops7b
npr2
cd33
psd4
ccdc78
defb123
lexm
nadsyn1
emilin3
sptb
krt81
snx22
gfra1
krtap9-7
nudt8
whrn
lce1e
tmed8
slc25a47
dtna
vwce
c16orf89
pes1
n4bp2
cend1
havcr1
taf1l
asb10
efhc2
rhcg
mrc1
vps18
or11a1
il15ra
carmil3
gzmb
cabp4
spry3
snx31
cd3e
c14orf180
edar
mmachc
lrg1
or6y1
muc4
tnni1
gja8
slc45a2
islr2
map7d2
emid1
gphb5
mrpl28
mybpc3
c1orf162
ggtlc1
c16orf78
aldh3b1
itln2
wnk4
sowahd
calml6
cacng8
repin1
odf3l2
gal3st2
pgc
slc43a1
ldb3
ccdc13
epha8
sprr4
sncg
il2rg
fcrl2
hrg
eda
pxdnl
cort
nkapl
fbll1
bhlhe23
plekhg5
znf467
adam33
braf
aicda
caln1
gng8
pdzd4
inhbc
prkn
gipr
btbd19
nos3
lrrc10
amer3
slc4a4
hmx2
padi3
lrrc27
crocc2
f7
slc12a3
mmp15
slc22a7
slc22a8
grid2
mroh7
prkcb
bche
pacsin2
ccl17
brd9
krt19
pou2f2
tnfsf14
ccbe1
cd177
arap1
ltv1
krtap2-3
manbal
ift80
pnma5
necab2
b4galnt1
rlbp1
chrm4
prkcg
zscan1
hopx
hist3h2bb
rhbg
pcare
c6orf223
shkbp1
slc12a5
defb121
prr18
fgd1
gpr50
arl9
acp4
cxcr1
card11
kcnn2
nbeal2
hpse2
marco
tppp2
ffar2
cd3eap
tbl3
tspan33
rbfox1
acer1
zdhhc11b
tpbgl
fpr1
elf2
c15orf62
pak6
tmc2
ndufs7
kiaa1614
cox4i2
prame
npb
