# Supplementary material for: Analysis of Differentially Expressed Genes in Osteonecrosis of Femoral Head, Osteoarthritis, and Rheumatoid Arthritis by Integrated Microarray Analysis
Source: Research Square preprint supplement (doi:10.21203/rs.3.rs-877622/v1), 2021-10-22
Supplement: Supplementary file 4 [file 33a57bb204df75249770cfd3.csv]

	logFC	AveExpr	t	P.Value	adj.P.Val	B
tnfrsf17	-5.27704870462391	4.25206010386558	-18.5589221950055	9.97117241963979e-15	1.23473028072399e-10	23.2892912723523
nfil3	3.39828771166084	9.28511334260294	18.1959992608671	3.89093173773086e-14	2.40907038541606e-10	21.9609923071999
mzb1	-5.28227291277294	5.50494229365276	-15.5490514130188	3.48801695152599e-13	1.43346199709967e-09	20.0744683974494
slc19a2	2.87249941364365	7.20752276186622	15.3282073637515	4.63128092246839e-13	1.43346199709967e-09	19.8124753552877
nkg7	-5.71274356052883	3.80467304886348	-15.1563820695465	5.78802389202808e-13	1.43346199709967e-09	19.6059088033903
pou2af1	-5.96591163086075	5.99053020084316	-15.0108252334536	7.00289406308091e-13	1.44528061971885e-09	19.4290250646559
klf9	2.11280537728733	7.76306021086156	14.6128009482155	1.18852120199753e-12	2.10249400633362e-09	18.9362590191255
hla-dmb	-2.67457440115966	9.61130611949585	-14.1505128788434	2.23047473009437e-12	3.02263669391024e-09	18.3467247915644
hla-dob	-3.61405576939393	5.37560599816632	-14.0887945265007	2.42911064910858e-12	3.02263669391024e-09	18.2665792089265
sema4d	-3.74457992616252	5.22810558583569	-14.0852816448252	2.44095670993317e-12	3.02263669391024e-09	18.2620071256257
sdc1	-3.89834013449221	5.9765843673418	-13.8739861430334	3.27668564538975e-12	3.42537016775713e-09	17.9849321619955
bcl6	1.93219580303557	9.18391913582714	13.864745782948	3.31942518073856e-12	3.42537016775713e-09	17.9727215703703
gadd45a	3.10660620643271	9.0495343891716	13.7691024171812	3.79748255749455e-12	3.617248193035e-09	17.8458694182149
jchain	-7.61194514876722	6.10989974166261	-13.6143356781993	4.72874350977431e-12	4.18257363439537e-09	17.6387905905953
igll5	-3.72829318166326	8.58012290012519	-13.1929321069895	8.6806835809316e-12	7.1661936521784e-09	17.0633669884544
sel1l3	-2.61132736034046	7.40206681600095	-12.5967253020318	2.10561873351116e-11	1.62961729856679e-08	16.2192470881584
cxcl13	-6.40064835023266	5.13897771412355	-12.4084478933872	2.8044058642498e-11	2.04276222452972e-08	15.9451034706105
csk	-2.04821062269318	7.682326922939	-12.3430767001857	3.10022804886992e-11	2.1327846627309e-08	15.8490461989959
top2a	-3.24821121107775	3.81133114914754	-12.258545913112	3.53161428415256e-11	2.30168314108743e-08	15.7241617960841
adamdec1	-3.70996997564111	6.52828895493074	-12.1357291423781	4.27277917454577e-11	2.64549122592001e-08	15.5413490609432
cotl1	-1.8616423234559	8.3979735247773	-11.9526229263392	5.69175664795883e-11	3.35623917007973e-08	15.2657570804566
cebpd	2.41299201819761	9.16808436942182	11.7957209666282	7.29633399893968e-11	4.10684108676682e-08	15.0266711264709
adh1b	4.068510045735	5.91801806443907	11.5316158893417	1.11452771461525e-10	6.00052030003504e-08	14.6180050077047
cd52	-4.57538411658131	5.68649249787213	-11.5026306175609	1.16807801234895e-10	6.02679584454879e-08	14.5726723985646
traf3ip3	-2.55662394976251	4.8680564881735	-11.4285213917	1.31750847200494e-10	6.52588296353488e-08	14.4563284359813
apold1	1.55873196151377	8.3542187306705	11.2230145107845	1.84516810505216e-10	8.78796794033112e-08	14.1303795092676
mxra5	-4.07989607518034	8.96456678232641	-11.1718618112301	2.00792866808333e-10	9.20895581365774e-08	14.0484809345609
atf3	3.18616874006054	8.616222146317	11.0868664865405	2.31215986191807e-10	1.02255269893327e-07	13.9117159536154
dock10	-2.76610848486594	3.6220489015588	-10.8741962487131	3.3022290924608e-10	1.39887938414299e-07	13.5657415099413
adamts1	2.36827930550489	8.83415512281242	10.8588281493234	3.38903186015422e-10	1.39887938414299e-07	13.5405300219903
klf4	2.38343224098818	10.0536552436388	10.8010993428023	3.73684706800447e-10	1.46629336945346e-07	13.4455700224388
ucp2	-2.31351684289211	8.68708539200753	-10.7928995503179	3.78917772934756e-10	1.46629336945346e-07	13.4320491190321
sav1	1.30970260509479	7.256199330486	10.7607898808181	4.0015367757415e-10	1.50154636042445e-07	13.3790237123948
rhob	1.74687340288494	11.5430180720662	10.7139170198768	4.33397204583937e-10	1.57845811304791e-07	13.3013928726945
apobec3f	-2.48636925776469	3.33792292618776	-10.6867331091188	4.53978622423896e-10	1.60617636613574e-07	13.256247776575
cd247	-2.38596440998331	5.88213615243632	-10.6600158343611	4.75197035703837e-10	1.63454580364462e-07	13.2117893401441
plpp3	2.17333804019268	10.3010038741123	10.5381976672363	5.85825141074497e-10	1.96061424916905e-07	13.0079652300032
fosl2	2.17322364991746	6.80753088394435	10.4063580563678	7.3614193325031e-10	2.3988540945891e-07	12.7852980865984
rnd3	1.84388607111154	9.64946467368281	10.3246144053827	8.48979550031386e-10	2.6956189148817e-07	12.6461463000199
fcgr3b	-1.57531893834085	7.96862695376715	-10.279975024308	9.18038238925255e-10	2.8400649778862e-07	12.5698014114103
zfp36	2.21044506290273	10.7920446032855	10.2607862677776	9.49491664750536e-10	2.8400649778862e-07	12.5369062110717
rrm2	-2.08022700171369	5.45120788849485	-10.2525825608436	9.63278115733024e-10	2.8400649778862e-07	12.5228283941944
dpep2	-3.62366664210068	3.85614944721238	-10.195946836172	1.06430244361942e-09	3.06494352542775e-07	12.4254065615758
arhgap25	-2.51621674505303	6.19038193085261	-10.1185672837692	1.22040904804727e-09	3.43461937317486e-07	12.2916415199778
ccn1	2.68896315620478	9.52252616461846	10.0795819813753	1.30788063448095e-09	3.59899686595059e-07	12.2239578427382
zbtb16	3.90571656199353	8.17587046900073	10.0556629732364	1.3647440364567e-09	3.62748231686075e-07	12.1823346535123
cd3d	-2.55451546338162	6.91709648620754	-10.0507163634296	1.37682038998995e-09	3.62748231686075e-07	12.1737175186179
vopp1	-1.7563284175825	9.32893300412624	-10.0223445902105	1.44825961944325e-09	3.68168702322731e-07	12.1242322062979
mreg	-1.61136392722595	5.80407177061375	-10.0190282372303	1.45685749929854e-09	3.68168702322731e-07	12.1184411356992
blnk	-2.10613754638322	7.04702059418597	-9.90241058566033	1.79544953534631e-09	4.44661031923866e-07	11.9138967849211
tns3	-1.86678547504234	9.19787302913088	-9.87065870733222	1.90110303614303e-09	4.54961723662762e-07	11.8578990085286
crlf3	-1.3788549901483	8.10651593121269	-9.86424383999874	1.92321992464789e-09	4.54961723662762e-07	11.8465697656919
cd2	-2.76615004644892	6.90076147504221	-9.85527678854818	1.9545841621231e-09	4.54961723662762e-07	11.8307241369485
rtp4	-2.63858110356897	5.23200979654138	-9.84699996278342	1.9840049323903e-09	4.54961723662762e-07	11.81608888949
hk3	-3.49475620246561	5.38732711097588	-9.81336411982545	2.10837252055751e-09	4.74690489492067e-07	11.756521230521
cyp4b1	7.05364595293176	5.21755532120435	9.73324660955579	2.43825561855684e-09	5.35448197627149e-07	11.6140395040114
ptpn6	-1.48439511347673	7.47185350696333	-9.72531127192579	2.47372009538188e-09	5.35448197627149e-07	11.59988133049
ccl5	-3.31816321628202	6.26698801294307	-9.71776233792391	2.5079540872466e-09	5.35448197627149e-07	11.586404881613
ednrb	2.14513072242271	6.61936028162295	9.55178791913392	3.39874955190618e-09	7.05501094576757e-07	11.2882021419825
lpxn	-1.41022418733665	8.57609919331297	-9.54053166351977	3.46995859636652e-09	7.05501094576757e-07	11.2678459145772
dok2	-1.61907351836576	7.27565973460787	-9.53845992112622	3.48323236438968e-09	7.05501094576757e-07	11.2640974605437
ptprc	-3.0041498138025	7.77359882649841	-9.53086452998998	3.53234820833069e-09	7.05501094576757e-07	11.250350042464
spry2	2.23793010065058	7.42228097413825	9.48374028554848	3.8535531054951e-09	7.57437271513426e-07	11.1648846584456
lst1	-2.78817760601674	6.65950031969726	-9.46894218148723	3.96054818619026e-09	7.66304190462406e-07	11.1379853442206
rac2	-2.77260732947109	6.41623871298988	-9.45212499886544	4.08588709837507e-09	7.78392922141208e-07	11.1073802728662
tcf7l2	1.83733957090293	7.80856340866861	9.43882363055826	4.18792963842151e-09	7.85744435038993e-07	11.0831466984475
maff	2.44765377428787	8.04043744041409	9.43040152348858	4.25390241299675e-09	7.86210053434906e-07	11.0677903208983
osbpl3	-2.01168950941908	5.99670545690743	-9.36677171166418	4.78846392251178e-09	8.71993364006815e-07	10.9514637077122
ccr5	-2.99268904973024	6.29937340517524	-9.31338020668376	5.29056446654644e-09	9.49464634626732e-07	10.8534341394544
hla-dpa1	-2.35533615465157	9.94902008190411	-9.28223807528103	5.60832028480733e-09	9.92111858382416e-07	10.7960779380542
mmp13	-3.39544949458158	3.7597093131914	-9.26846550709153	5.75509038071708e-09	9.97168489828635e-07	10.7706704136472
ptprcap	-2.95389930360611	4.79151011597116	-9.26451135374412	5.79795940141013e-09	9.97168489828635e-07	10.7633710802937
myc	2.55485433756491	9.26181244596972	9.25034667998451	5.95425951007111e-09	1.01002185634535e-06	10.7372058381123
ncf1	-3.85891922201011	6.86829545726335	-9.22922011134945	6.19553407803479e-09	1.03674727686898e-06	10.6981299448729
fam107a	2.94787672849772	5.79686706912026	9.22167440131289	6.28414417246624e-09	1.03755409716866e-06	10.6841586619813
cd27	-2.374611080631	6.81865774251557	-9.16905905563641	6.93964445204410e-09	1.12175554255492e-06	10.5865236243265
lck	-2.994478162997	5.29242023927364	-9.16634624761816	6.9753029780125e-09	1.12175554255492e-06	10.5814794317735
maoa	3.73047441822048	6.39167714771366	9.03766072950846	8.90460299652362e-09	1.41366280648656e-06	10.3410486639585
slc12a8	-2.61818435507406	4.82002039352201	-9.01619061789746	9.27678210155049e-09	1.45410623751266e-06	10.3007143860327
hla-dma	-2.16880339334309	9.8003248873904	-8.98635964716427	9.82081438656028e-09	1.5201393068597e-06	10.2445682655839
ppp1r15a	2.71915387896071	8.60164148761458	8.97247054697381	1.00852775390479e-08	1.54180236748185e-06	10.2183853311272
pim2	-1.67362245263775	6.92764727579261	-8.86124843418936	1.24878828987533e-08	1.86568408883072e-06	10.0077584891919
abtb2	1.39362050007856	6.62984844827545	8.86053021286178	1.25051909370064e-08	1.86568408883072e-06	10.006392816501
ccdc102b	-3.03509397803772	3.05399212992469	-8.79829404548996	1.41033655591964e-08	2.07907113951821e-06	9.88778221444054
hla-dpb1	-1.92220054925943	11.01161196245	-8.7237744356099	1.62986014965172e-08	2.37441861566321e-06	9.74505621919001
ndc80	-3.42936286957484	3.01913027775458	-8.71385326338255	1.66164589628668e-08	2.38159471123664e-06	9.72599628627633
plin1	4.07277332896236	5.94157945670052	8.71027966848978	1.67325155356204e-08	2.38159471123664e-06	9.71912757206698
angptl7	5.07302546500286	5.22428378919618	8.6845230245214	1.75941805557909e-08	2.47578111161771e-06	9.6695689192878
icam3	-2.35604111217435	6.09750272289256	-8.64431484867948	1.90321436699839e-08	2.6193955067288e-06	9.59201952404592
adm	3.07594956524327	9.60945953993253	8.64416184351781	1.9037841848146e-08	2.6193955067288e-06	9.59172399378636
alox5	-1.39255117489222	6.66651398932882	-8.61014326779246	2.03496034405717e-08	2.76911142202856e-06	9.52593599706498
klrd1	-1.62908289895037	5.41925954640877	-8.56718041897753	2.21409633034286e-08	2.98012552811257e-06	9.44262032856872
p2rx5	-3.22149709013572	5.09400755626564	-8.53665406586729	2.35122628780158e-08	3.13067044320934e-06	9.38326561465315
aqp9	-3.83364775394715	5.63157108207175	-8.52901220016051	2.38690971201199e-08	3.14437265572813e-06	9.3683865874898
rnaset2	-1.30722455291211	9.38977050268339	-8.46464107193302	2.71063359190673e-08	3.52660554952057e-06	9.24272937192297
rassf2	-1.33125131643731	7.72761885723677	-8.45858265578452	2.74335192091069e-08	3.52660554952057e-06	9.23087305190938
gadd45b	2.74301716994195	8.66940151361825	8.4550710357678	2.76250293388917e-08	3.52660554952057e-06	9.22399845984963
gpx3	2.06135446284398	11.5009733637167	8.44372766071519	2.82531478916596e-08	3.56998704431042e-06	9.2017800835494
arpc1b	-1.26266496074634	9.94785822262609	-8.42017414058556	2.96049696887183e-08	3.70301353187271e-06	9.15558802894797
plbd1	-1.32330971893586	8.96624820499848	-8.40967017005197	3.02292162087529e-08	3.73812617184107e-06	9.13496307911154
lilrb1	-2.57198692053068	6.73953469596191	-8.40083739511172	3.07646672822168e-08	3.73812617184107e-06	9.11760761876248
dpysl3	-1.32528653973409	8.2677933301344	-8.39161581538159	3.13341544964748e-08	3.73812617184107e-06	9.09947653048906
tiparp	1.80379868639392	9.00511766262362	8.39137526033963	3.13491551459147e-08	3.73812617184107e-06	9.09900340158426
nrep	-1.69132528292743	7.07663981778903	-8.38699604913024	3.16235371327576e-08	3.73812617184107e-06	9.09038885526542
dhrs9	-2.06598028186364	7.18413057865022	-8.38157639261053	3.19665482522136e-08	3.73812617184107e-06	9.07972387848407
il21r	-2.33540710108449	4.65649264786327	-8.38106960493618	3.19988188819473e-08	3.73812617184107e-06	9.07872639460713
aim2	-2.56467314399305	6.71011702449776	-8.37093053525489	3.26515648629005e-08	3.77873203455418e-06	9.05876262156379
wasf3	1.84576092653211	7.77693140886854	8.32735091884843	3.5617748515239e-08	4.08383870244633e-06	8.97279038499788
necap2	-0.980567338515711	8.25841628971974	-8.30489978634973	3.72531759117348e-08	4.17265340130021e-06	8.928395593557
hla-drb5	-1.66092354523473	11.5907464929652	-8.30475660050681	3.72638515001144e-08	4.17265340130021e-06	8.92811223123409
tgfbr3	2.46415447019735	9.33299444705749	8.30289071485054	3.7403256686128e-08	4.17265340130021e-06	8.92441941235538
btn3a3	-2.00973072284037	7.14668461698243	-8.25604361831704	4.10857070103876e-08	4.54253848133598e-06	8.83154291951771
lilrb4	-1.60727457978472	6.20757149712881	-8.23286498114914	4.30442316293737e-08	4.71696212625252e-06	8.78547617565209
nckap1l	-1.39947200197512	7.098072853286	-8.22558685684907	4.36789079543111e-08	4.7445255894582e-06	8.77099557292535
cep55	-2.61160370776772	3.85663613657858	-8.21330112364612	4.47722814772043e-08	4.80773130176149e-06	8.74653490150322
gabarapl1	1.91392907995107	7.85920610491431	8.20765709502106	4.52840120273872e-08	4.80773130176149e-06	8.73529062790497
nusap1	-1.6809432135156	4.85243645463229	-8.20610767659814	4.54255481148424e-08	4.80773130176149e-06	8.73220302697092
cdkn1a	2.05625871780969	9.21900671870593	8.15049752735152	5.08199480154624e-08	5.31734371614961e-06	8.62116243009471
itgal	-2.74978210932005	4.76122928381762	-8.14778510243135	5.10994025859488e-08	5.31734371614961e-06	8.61573521654225
ly86	-1.48994980942839	8.3268182767729	-8.11549967261756	5.45501875503345e-08	5.62912477029827e-06	8.55105671247113
coro1a	-3.05160056172505	6.39461703485394	-8.0968006706645	5.66579857004934e-08	5.79824494963361e-06	8.51352926902666
lama2	2.3772766546972	5.66573670427025	8.09274998346387	5.71255660062425e-08	5.79824494963361e-06	8.50539336854705
gfra2	-2.05921745375174	4.29288186050011	-8.07607802712195	5.90923846346281e-08	5.92516753311122e-06	8.47188303335238
lilrb3	-2.48439421663096	6.4563464882214	-8.0740776993498	5.93330189861739e-08	5.92516753311122e-06	8.46785978095366
fosb	5.24359202512502	8.97017043820121	8.05172902550332	6.20913219426693e-08	6.1510147169286e-06	8.42287166217387
lilrb2	-3.13879142393626	6.41509242481308	-8.00241318742947	6.86563163373394e-08	6.65782587801528e-06	8.32334954272321
fkbp11	-2.31809188950771	8.01846904176276	-8.00220838354497	6.86850256619923e-08	6.65782587801528e-06	8.32293552299529
fabp4	3.27093413549853	8.78385197347334	8.00124459949845	6.88202949516237e-08	6.65782587801528e-06	8.32098711342626
cd79a	-2.09891926067128	6.80249247971722	-7.99240700044107	7.00735658162727e-08	6.72042954766012e-06	8.30311470706364
csf1r	-2.14438878440501	9.19901167477297	-7.98907036911845	7.055284189581e-08	6.72042954766012e-06	8.29636412868877
fermt2	0.983958775408119	7.99551237359802	7.94399443658352	7.73694826682739e-08	7.31348323573463e-06	8.20501414203188
galnt1	-0.979751470056529	8.17824619578417	-7.92996014930791	7.96278282366001e-08	7.4699348261653e-06	8.17651413661773
btg2	1.32899169712606	8.4325644229781	7.92308161284287	8.07594276964301e-08	7.51912776815709e-06	8.1625354837264
prkcb	-1.64767310506558	5.91416741604715	-7.91554792337497	8.20178633160329e-08	7.57930747345101e-06	8.14721777795519
tceal2	2.40312800237905	5.13778614952449	7.90881346837515	8.31599189655383e-08	7.62792056703897e-06	8.13351833488383
prdx4	-1.21517068725604	9.7464585379312	-7.873416829192	8.9438227021618e-08	8.13547711602474e-06	8.06140841423791
apod	4.34233967988337	9.38841084991902	7.87033608952351	9.00072974961955e-08	8.13547711602474e-06	8.05512400017836
piga	2.21645654752604	6.37527834416676	7.85340415288557	9.32023159023813e-08	8.35088822239366e-06	8.0205606306322
svep1	1.60638646914468	5.34994351444365	7.84904959668949	9.4042770711311e-08	8.35088822239366e-06	8.01166510105309
tns2	1.73758438247213	8.47949872121411	7.8471406996675	9.44136599479215e-08	8.35088822239366e-06	8.00776474670563
aif1	-2.07334304631506	7.72820042311619	-7.83703697275926	9.64020463518653e-08	8.46628751755424e-06	7.98711176708012
agtr1	2.12736854941187	7.41913774577948	7.82322156179243	9.91910295283922e-08	8.64987689190198e-06	7.95884851134848
crybg1	-1.0776508865638	8.2688301544274	-7.80349135584092	1.03319117325859e-07	8.92882648190062e-06	7.91843836203404
sfrp1	1.75214333811308	7.66336680045944	7.80109723737954	1.03831948105765e-07	8.92882648190062e-06	7.91353115740736
depp1	2.25421739421245	9.34701789950863	7.79399088755294	1.0536967665499e-07	8.99857038633613e-06	7.89896058565087
thy1	-1.96514889495207	7.7902169014732	-7.78710792361924	1.06881464514871e-07	9.06515873347702e-06	7.8848412673413
calml4	-2.04579238467462	5.0469734976144	-7.76693826839019	1.11441709618316e-07	9.38763734832387e-06	7.84342804555167
h3f3b	1.54072981127675	10.807020532956	7.7208509757676	1.22630506958942e-07	1.02603619437336e-05	7.74858509118247
mx2	-1.2135729847537	7.62990875724967	-7.71638627801906	1.23774254388142e-07	1.02865543093179e-05	7.73938135079332
junb	2.16127001574487	9.83033062071471	7.70766752594145	1.26039606342178e-07	1.0404989635568e-05	7.72140003314339
lcp1	-1.59465392290587	8.60366789051957	-7.65135284537215	1.41739105943778e-07	1.16235453569656e-05	7.6050012632717
tfpi	1.67174843535358	7.10255636041148	7.62263101590929	1.50509256134492e-07	1.21645480556232e-05	7.54546392488217
cd6	-1.44578745633704	5.24476967767216	-7.62022628432575	1.51268462306172e-07	1.21645480556232e-05	7.54047392645171
gsap	-1.39764403716367	7.63822470631069	-7.62017959042644	1.51283243201645e-07	1.21645480556232e-05	7.54037702509357
slamf7	-3.12234303230033	5.09665201127705	-7.61367722422621	1.53356165244007e-07	1.22209282959454e-05	7.52688003018439
daam2	1.48931415710298	7.55154828235422	7.61180561499829	1.53958234205563e-07	1.22209282959454e-05	7.52299402417727
actr3	-0.896074524664328	9.92665954157889	-7.58621288595807	1.62439819664093e-07	1.28120527828055e-05	7.46980687691878
smco4	-1.34089253164247	7.92647500211615	-7.57855334130195	1.6507076411241e-07	1.28494386091276e-05	7.45387089388244
itgb2	-1.64632255206109	9.169404545548	-7.57739933712385	1.65470937800114e-07	1.28494386091276e-05	7.45146923174354
itga4	-2.26558953549576	4.1842889551129	-7.5758010551901	1.66026825281467e-07	1.28494386091276e-05	7.44814265095548
sorl1	-1.97638360896551	7.48416011949492	-7.57207537041488	1.67330113887573e-07	1.28698683246572e-05	7.44038681796316
magi2	2.18392799829876	4.67311470234196	7.55912918143781	1.71941389700123e-07	1.31429026460285e-05	7.41342138956783
bzw1	1.31686939144229	9.79207488059422	7.55178331131397	1.74615932701066e-07	1.31862613794664e-05	7.39811036771967
per1	2.53078565533553	8.18067252431239	7.55172219211308	1.74638364389283e-07	1.31862613794664e-05	7.39798294513724
c1qa	-1.32262226140847	10.6227021272725	-7.46465858279316	2.09811233470772e-07	1.57460151761732e-05	7.21594164483184
oas1	-1.65039405368356	6.75810393500295	-7.45618130358697	2.13605062417333e-07	1.59341655898424e-05	7.19816006201214
hla-dra	-2.1963879009177	11.2140415624374	-7.42768887360303	2.26882218043356e-07	1.6823248539107e-05	7.1383222739538
lrrc15	-3.13122771175676	7.49286056131077	-7.42079209566624	2.30221964600749e-07	1.69594097941691e-05	7.12382118264132
septin6	-1.10173385733689	6.55510987241427	-7.418266381949	2.31457664153645e-07	1.69594097941691e-05	7.11850899082367
cklf	-1.19123154462412	6.96287894490298	-7.39240655027873	2.44509514200055e-07	1.7761208899766e-05	7.06406849608526
naga	-1.05459857009936	7.71352638361109	-7.39038497054078	2.45561255985576e-07	1.7761208899766e-05	7.05980872570618
kif20a	-2.85306844103574	3.74689967872172	-7.38819974140058	2.46703378079605e-07	1.7761208899766e-05	7.05520348402321
adam28	-2.3360967477528	4.29310450269429	-7.37599595640809	2.53183096718516e-07	1.80802025984775e-05	7.02947255069369
marcks	-1.55338116001277	8.11929800925342	-7.37437959105094	2.54054369065258e-07	1.80802025984775e-05	7.0260629949132
psmb9	-1.77557388770343	8.69996608879317	-7.35813487170177	2.62984121840152e-07	1.85803104774917e-05	6.99177633628647
c7	3.1638465995129	7.64039334647323	7.35617591752474	2.64082584514135e-07	1.85803104774917e-05	6.98763923122855
smad3	1.4280082817834	6.61157602702489	7.33794192537811	2.74536536793189e-07	1.92067001983619e-05	6.94910547744383
ptgs2	3.28046780138413	5.83405995527398	7.32362150244325	2.83044890585777e-07	1.96907015737285e-05	6.91880999729049
akr1b10	3.07601160809965	5.56680337408097	7.2973808452544	2.99346985825337e-07	2.07084565669003e-05	6.8632232165593
flrt2	-2.21685046145355	6.25511130257281	-7.29179002820232	3.02943446387604e-07	2.08408260923206e-05	6.85136765181659
ltb	-2.80075101821639	5.92568731339448	-7.28330461925081	3.08487127273757e-07	2.11049508123256e-05	6.83336574588014
cxcl10	-2.30954076155601	7.77439998259711	-7.27984252426847	3.10778872988142e-07	2.11449163967701e-05	6.82601801496625
fhl5	1.72030845968593	6.15960498831441	7.27462245880493	3.14267491937263e-07	2.12613409885319e-05	6.81493615609334
lgals2	-3.72344010152564	3.70511533621979	-7.27202913332051	3.16015596003692e-07	2.12613409885319e-05	6.80942929920693
nid2	-1.75015491171244	8.1468071378876	-7.26579620908714	3.2025812322656e-07	2.12613409885319e-05	6.79619006373725
il7r	-2.32406926373563	7.61187591788549	-7.2652725074966	3.20617246984879e-07	2.12613409885319e-05	6.79507743554806
cst7	-2.43756382621426	5.90139595110304	-7.26460596451585	3.21074922462688e-07	2.12613409885319e-05	6.7936612796208
mt1x	1.54150888132606	12.2581620780068	7.24923103596747	3.31820690859918e-07	2.18560405048849e-05	6.76097830247969
fndc4	2.91553238505646	5.86615410956992	7.24395318028143	3.35594220868741e-07	2.19876361746964e-05	6.7497514985048
lap3	-1.55095241568401	9.68706452937909	-7.24119487604376	3.37583878969803e-07	2.20015851225425e-05	6.74388264090056
sdc3	-2.6727483107565	6.9457211275537	-7.22847533419569	3.46917178451016e-07	2.24914943495232e-05	6.71680568121226
selplg	-1.89844125014357	6.48253809164562	-7.2212778757427	3.52315734167419e-07	2.27225298760164e-05	6.70147411381974
arhgdib	-1.23470416273903	10.1717841453034	-7.19450704737407	3.73165991532485e-07	2.38767891240401e-05	6.64438622041756
btn3a1	-1.72990374982012	6.08361583725145	-7.19318917330636	3.74224615778129e-07	2.38767891240401e-05	6.6415733610452
ada2	-2.74944216993308	8.8003251297541	-7.1909910044355	3.75997244543958e-07	2.38767891240401e-05	6.63688107848963
arhgef18	-1.04646425295028	7.98739306435979	-7.17167466713644	3.91950553349507e-07	2.47332468590575e-05	6.59561935298556
samsn1	-1.89153119393197	7.27079985467479	-7.16986672521006	3.93478933314571e-07	2.47332468590575e-05	6.59175478657849
dazl	-2.4703370571781	4.09556842002835	-7.15807350119454	4.03600159686089e-07	2.52413170575396e-05	6.56653521657962
c6	1.68880147474686	7.04841765808436	7.1488750090251	4.11680191007367e-07	2.55317123436151e-05	6.5468512385158
crip1	-2.39288579935194	9.41159206517113	-7.14810153768436	4.12367154059841e-07	2.55317123436151e-05	6.54519555016959
kmo	-1.22492743368267	5.58577623799179	-7.13561600555494	4.23620852299746e-07	2.60979950946654e-05	6.51845779689272
il32	-3.7770251765783	4.93131949022212	-7.12751457028096	4.31091536442221e-07	2.64267648305149e-05	6.50109721008226
ghr	1.69640395416354	7.03128962090514	7.12450763437005	4.33898725312715e-07	2.64678222440756e-05	6.49465136324241
pck1	5.14557287181617	4.61809069807966	7.1176330604256	4.40387475376939e-07	2.67319515078071e-05	6.47990999076435
bmp2k	-1.78375985924093	5.3584618399796	-7.11369717588243	4.44147307177719e-07	2.68286639257644e-05	6.47146724887438
aplnr	-2.7208120132248	5.83116184523689	-7.09869296559919	4.58785814285276e-07	2.75783725159931e-05	6.439262857898
fcgr1b	-2.15182430541121	7.6663210117601	-7.09628305598794	4.61182829103038e-07	2.75885361004006e-05	6.43408747852347
ablim1	1.43116027068669	7.5157059850293	7.09379327852756	4.63672812971023e-07	2.76041367452893e-05	6.42873975079058
plxnc1	-2.73183030081222	5.06987877962228	-7.08729542730969	4.70236531440597e-07	2.78609520039661e-05	6.41477921975707
myo1f	-1.08099293114359	7.80498952480835	-7.07711532071151	4.80712549623545e-07	2.83460166761351e-05	6.39289589531816
egr1	2.14203224716689	9.47431582242679	7.06910379597241	4.89125517497501e-07	2.87054089249837e-05	6.37566430374841
mt1m	2.66020897162006	9.76462407781539	7.06531775724158	4.93153799061273e-07	2.88052994989422e-05	6.36751807279933
mtus1	1.11993095939193	7.31606290721549	7.06278190813169	4.95870960796684e-07	2.88280286739218e-05	6.36206072631953
plcg2	-1.14823077090055	7.52501173021317	-7.0468336620324	5.13316008517115e-07	2.97027669788198e-05	6.32771888728431
myoc	3.09579549231186	6.95287057498015	7.03755016834091	5.23760134805321e-07	3.01661476711363e-05	6.30771261367396
sell	-1.9126991178272	6.72185815891235	-7.03313469378965	5.28804057316198e-07	3.03156511191967e-05	6.29819301381338
lta4h	-1.63645999580053	9.47143629612193	-7.0204957206984	5.43519773715221e-07	3.10156928936202e-05	6.27092929889195
herc1	-0.85728152861575	7.2644999142775	-7.00624809612824	5.60614218834122e-07	3.18444306046924e-05	6.24016969584678
parp12	-1.12865974501901	7.95943535650546	-6.98480966347253	5.87384368184945e-07	3.32126969462748e-05	6.19383412452568
timp4	3.31782060536516	7.39308999683494	6.96786909076772	6.09465308999225e-07	3.43045860060791e-05	6.15717621173699
gzma	-1.75143521395404	6.11947693740553	-6.95850618013054	6.22033527169065e-07	3.48535799408803e-05	6.13689916536771
npas2	1.77252084118233	4.54588052850951	6.94890258563564	6.35201733141412e-07	3.54310948715771e-05	6.11608866600696
bag3	1.80944224280966	9.18423113083053	6.94038629886368	6.47118633402816e-07	3.59339463561752e-05	6.09762397367742
ctsh	-1.42099863317419	9.80226802783171	-6.93120851671488	6.6021862046968e-07	3.6348337768273e-05	6.07771418868188
cd86	-1.64760313511286	6.69488526503413	-6.92961943927331	6.62514331818858e-07	3.6348337768273e-05	6.07426578617697
syk	-2.18236822256728	5.46447788634614	-6.92901669372903	6.63387251524646e-07	3.6348337768273e-05	6.07295770045017
nova1	2.92651743085484	5.16920347107482	6.92261136377494	6.72737037963346e-07	3.66982499607935e-05	6.05905377686972
ccnl1	2.0213979220871	9.19359090345609	6.91493253174914	6.84124432445834e-07	3.71557581007753e-05	6.04237826740285
ddx58	-1.13536801297132	5.85575762337649	-6.91160134507413	6.8912585957853e-07	3.72639542321438e-05	6.03514174708659
mmp1	-6.37924239087243	7.29775971674348	-6.89986870959134	7.07042334509213e-07	3.80665444705547e-05	6.00964251605371
rasgrp1	-3.55541740586818	4.41724433523621	-6.89405232192308	7.16101062427019e-07	3.82683392413714e-05	5.99699461837587
aass	1.77095483615186	5.07881704982299	6.8934975945737	7.16971227004616e-07	3.82683392413714e-05	5.99578811302099
ikzf1	-1.37796534696534	4.494194861588	-6.89092900353428	7.21014589952727e-07	3.83189856969297e-05	5.99020101707573
eif1	1.29870797343127	10.1290884639539	6.88680929669479	7.27548631441227e-07	3.85010030048578e-05	5.98123816377832
plaat4	-1.77619390982848	7.77462560536982	-6.88014894025569	7.38241206225517e-07	3.89005993901727e-05	5.96674308855808
pttg1	-1.03720109461729	8.00881724037088	-6.87516587145256	7.46346524918607e-07	3.91610551613013e-05	5.95589447560249
il10ra	-1.30882636578168	8.55123150359438	-6.87061465179081	7.53829278374678e-07	3.92604170008287e-05	5.94598315833426
lamp3	-3.45393873508773	4.91804675458141	-6.87015986828166	7.54581219914175e-07	3.92604170008287e-05	5.94499261259107
pycard	-1.2344200047883	7.34993613211826	-6.8554588710009	7.79307502791973e-07	4.0168407959772e-05	5.91295818546638
nr4a2	3.04064912617591	6.96358229032203	6.85544305826644	7.79334542330733e-07	4.0168407959772e-05	5.91292371307067
resf1	-1.42972780300294	7.24306612215998	-6.8540244779026	7.81764218550032e-07	4.0168407959772e-05	5.90983101620047
adcy2	1.65093001776828	5.11981437479489	6.85091823649386	7.87111646427769e-07	4.02351430998301e-05	5.90305805963251
leprotl1	-0.854999412440169	7.53521812611694	-6.84950239835226	7.89561477288113e-07	4.02351430998301e-05	5.89997049321125
clec10a	-1.46400590162979	6.53896588267206	-6.84758918617725	7.92884363524437e-07	4.02388814488652e-05	5.89579786482888
tsku	2.41122015936346	7.48093319514377	6.83836380392271	8.09109867137038e-07	4.08947244275834e-05	5.87567093108014
klf2	1.48101749157074	10.5454296597854	6.81765801821558	8.4678036346076e-07	4.2624720490791e-05	5.83045637022638
plek	-1.40171763320507	7.63856369059081	-6.81256412018075	8.56320854044629e-07	4.27947776156877e-05	5.81932432127168
cd48	-1.63299178565911	7.57231513657161	-6.81216630234666	8.57070568415613e-07	4.27947776156877e-05	5.8184547984336
gzmb	-3.07021375727534	5.41558887142789	-6.80855280278894	8.6391139413309e-07	4.2963111620683e-05	5.81055570540639
abca5	1.19739297703137	6.24218572592547	6.79476694613759	8.90528974356214e-07	4.4109681157812e-05	5.78040410613007
trim21	-0.874469434749395	7.66778977597912	-6.78558590381007	9.08721472465161e-07	4.48314661097056e-05	5.76031002419385
tspyl2	1.32275595940048	8.30781499857561	6.78301626168898	9.13881324860253e-07	4.49071128799386e-05	5.75468399681187
clec7a	-1.81485441206111	7.35095157766903	-6.77969447928301	9.20596087135853e-07	4.49173926127728e-05	5.74740993436192
lep	3.47326455569724	3.73911384010064	6.77932543322648	9.21345209048234e-07	4.49173926127728e-05	5.74660170539855
cdh19	2.02312831618697	4.07193613255671	6.76569568698844	9.49454980185499e-07	4.61062785083805e-05	5.71673939146221
dock4	-1.57280325642383	7.09960522613279	-6.76001374908664	9.61431945431079e-07	4.65055147666916e-05	5.70428327459924
pilra	-1.87860233635925	5.92253844435465	-6.74678662637514	9.89917937906039e-07	4.76970965956828e-05	5.67527002750874
kcnk3	2.13181227398678	6.37630725315874	6.7412747635924	1.0020427122023e-06	4.80425227043252e-05	5.66317319989016
prf1	-1.82603729037513	6.29672963090469	-6.74000995227883	1.00484643304694e-06	4.80425227043252e-05	5.66039677272774
apobec3c	-1.13970257797081	6.2956941547906	-6.73618149918842	1.01338218273706e-06	4.82642752647426e-05	5.65199154368709
dnajb1	1.51332285085528	8.78522858295271	6.7241941086489	1.04059325294113e-06	4.93703687784292e-05	5.62566131734082
slamf8	-2.46327749285841	6.92192102570075	-6.71859679080448	1.0535547647405e-06	4.964223605037e-05	5.61336044096582
lax1	-1.10633869196308	6.72380912942164	-6.71825941843259	1.0543412808889e-06	4.964223605037e-05	5.6126188885965
klrb1	-2.28865707285906	5.46619332298537	-6.70916753895568	1.07576567903672e-06	5.04591151648169e-05	5.59262915637881
fyb1	-2.09136333182372	5.84571384442918	-6.70583995321249	1.08371815513051e-06	5.06403091131362e-05	5.5853103245131
snx10	-1.70040035604239	7.41707354574232	-6.69284957005928	1.11534536186563e-06	5.19222617142186e-05	5.55672498854984
slc7a7	-1.31452995643784	9.01007214239128	-6.67977897764926	1.1481246141365e-06	5.31851718712804e-05	5.52794110397693
acp2	-1.06091412974746	8.66786040280499	-6.67746985367911	1.15401754437272e-06	5.31851718712804e-05	5.52285368663339
col3a1	-1.82120555746996	9.44256948643459	-6.67639764882935	1.15676437500861e-06	5.31851718712804e-05	5.52049119149783
ly96	-1.50094790718977	8.57571767204223	-6.67527249233795	1.15965407455752e-06	5.31851718712804e-05	5.51801186315134
hck	-1.59518156764228	7.95812612960941	-6.65324783868513	1.21773539724905e-06	5.56428687237454e-05	5.46944676421366
socs3	1.50200578880105	6.0051570099045	6.61694630317167	1.32006222608189e-06	6.00493172097442e-05	5.38926459028335
socs2	1.37989024097988	6.6883813509509	6.6138146801682	1.32929309101515e-06	6.00493172097442e-05	5.3823396091371
aspm	-3.08176144311962	2.54429882424694	-6.61199447106076	1.33468879357889e-06	6.00493172097442e-05	5.37831399134218
bcl11b	-1.67057980662146	5.50489425948451	-6.61149461282166	1.33617446698255e-06	6.00493172097442e-05	5.37720841888434
mlec	-0.798972358318795	7.57994383032404	-6.61074135309468	1.33841650245412e-06	6.00493172097442e-05	5.37554231982801
gdf15	2.07865061981533	3.56063480036456	6.60478888510966	1.35626997596499e-06	6.04457377451911e-05	5.36237379333287
akr1c1	1.50106584165231	8.76321032659092	6.6045422832238	1.35701486660447e-06	6.04457377451911e-05	5.36182814333859
nfe2l3	-1.12400877532973	5.82429902930706	-6.58500397256478	1.41738662813734e-06	6.28059152563102e-05	5.3185715686857
arpc2	-0.889775276637355	9.98404508370382	-6.58221862385721	1.42621477190225e-06	6.28059152563102e-05	5.31240102769395
ube2l6	-1.00883781578945	8.81068125957535	-6.58108144286162	1.42983525207973e-06	6.28059152563102e-05	5.30988148269489
c1orf54	-1.39177167438971	8.23073551439766	-6.58093914520801	1.43028895278038e-06	6.28059152563102e-05	5.30956619559863
olfml2b	-1.57675874862402	8.73980677662953	-6.57657436961421	1.44427752443516e-06	6.31960727388007e-05	5.29989396871227
golm1	-1.92205680248946	7.98660198572716	-6.57420390323428	1.45193329104918e-06	6.33073589544438e-05	5.2946400646601
lcp2	-1.31027432165792	6.90547632860882	-6.56970607554402	1.46657428334147e-06	6.34994056579783e-05	5.284669115238
ier2	1.97158215407038	10.8851306978995	6.56970013551374	1.46659371866121e-06	6.34994056579783e-05	5.28465594546464
arid5b	1.48718544191036	9.85987340778886	6.56782194305543	1.47275228327097e-06	6.35438729050327e-05	5.28049153886339
arhgap15	-1.59246134807441	6.69028337933698	-6.56059508658829	1.49669743421371e-06	6.43527928050985e-05	5.26446368315695
znf710	-0.859401695973735	5.79504179507485	-6.54021752197512	1.56638861793883e-06	6.7116229259296e-05	5.21923437524807
emp1	1.05811409805496	9.06766588662023	6.53582312562404	1.58184859100289e-06	6.75449348358234e-05	5.20947386192543
irs2	1.83410299326572	8.00273243496671	6.53365287704124	1.58954138890998e-06	6.7640175322585e-05	5.20465256620253
gmfg	-1.37450173975084	7.61333524825078	-6.53091102426587	1.59931520135108e-06	6.78230141723646e-05	5.19856058047958
ephb2	-1.22163957866504	5.20487140518282	-6.51857951658175	1.64404057802899e-06	6.94817558966994e-05	5.17115012941923
map1b	1.70036461591923	5.75344580829689	6.51439114655459	1.65952150922416e-06	6.98974654718462e-05	5.1618358826117
mnda	-1.79669279598595	6.88355755344618	-6.49210665101847	1.74443813765608e-06	7.3225008334221e-05	5.11224186410349
adcy7	-1.71097511796511	7.10798494453053	-6.48876814523544	1.75753812387523e-06	7.35256573917128e-05	5.10480668942488
ppp1r16b	-2.38236314769667	4.19080471927255	-6.48474597703529	1.77345475287683e-06	7.39417178615281e-05	5.09584708496338
fgf2	1.24085454464871	5.01924968050265	6.43969988026761	1.96214019911595e-06	8.15341680726603e-05	4.99536694406703
cd300c	-1.15971320684358	6.47937359629762	-6.43095644665562	2.00108564963858e-06	8.28743933092795e-05	4.97583465300304
cytip	-2.1132228614398	7.08385627130374	-6.4046420312775	2.12314477569263e-06	8.76363391913394e-05	4.91699306801509
tmem176b	-1.80364638448824	9.397280992509	-6.39469261710614	2.17125931420969e-06	8.92163489449829e-05	4.89472306995859
bhmt2	1.62200489149542	6.19056748516463	6.3937586676312	2.17583278538196e-06	8.92163489449829e-05	4.89263196771965
runx3	-1.30627908858053	6.49010228794934	-6.38002704113399	2.24422613623085e-06	9.16541015681807e-05	4.86187471073992
cyba	-1.88797525965074	9.40722101882623	-6.37887002387761	2.25008857923984e-06	9.16541015681807e-05	4.85928207473644
cd180	-1.79294676797595	6.58791992668165	-6.35175729906896	2.39204874702694e-06	9.71171791292938e-05	4.79848146324602
arpc5	-1.06685902286156	9.89780301073509	-6.34511722507497	2.4281933587735e-06	9.82624783061838e-05	4.78357742542663
enc1	-1.49319649113999	5.1698229617024	-6.34107218304766	2.45048583047812e-06	9.8841583188308e-05	4.77449547663411
rps6ka1	-1.06362073227883	6.27718155397709	-6.33754823395355	2.47007731109949e-06	9.93083355303409e-05	4.76658187746329
ddx60	-1.3619820413262	6.51045394298004	-6.33256622808281	2.49804892359941e-06	0.00010010789586062	4.75539141867343
zeb1	1.60717026663416	6.95191642345651	6.31814917077896	2.58083545023302e-06	0.000102799730237509	4.72299133808752
gprasp1	1.50003767970913	7.07554526529802	6.31798003769039	2.58182315302149e-06	0.000102799730237509	4.7226110896135
timp1	-1.12576070975079	11.9761996230182	-6.31473914829603	2.60082422824687e-06	0.000103224379546093	4.71532419224658
tlr7	-2.40726613568146	6.26447360019314	-6.30715215570459	2.64586808809388e-06	0.000104676627906922	4.69826047977207
cfd	1.40064768949663	11.0225879588628	6.2991691864073	2.69412576518308e-06	0.000106246367357523	4.68029874312802
cd14	-1.81634534771119	10.5797996265613	-6.29199339694985	2.73827281248182e-06	0.000107644546784007	4.66414666560519
ctsb	-1.04966760354465	10.9248485033469	-6.28821228082417	2.76183230458889e-06	0.000107941120845717	4.65563323022998
rrad	2.65141553715046	5.10570363280593	6.28798566981339	2.76325085262797e-06	0.000107941120845717	4.6551229462719
sorbs1	1.02089974536967	5.52772512238179	6.27101656811052	2.87162196176398e-06	0.000111821681611709	4.61689446406954
sash1	1.79076038794811	9.67274995842124	6.26243924216985	2.92804568151379e-06	0.000113661409636944	4.59755820762684
ddx24	1.24941721718377	8.21803257104947	6.25967233785376	2.9464880966161e-06	0.000114019881563741	4.59131879040076
rergl	3.11380393488494	4.05482351716484	6.24221620523426	3.06561302165595e-06	0.000118151990504593	4.55193405677193
rhobtb3	1.23485057224247	7.00586909590822	6.24124947750243	3.07235249474917e-06	0.000118151990504593	4.54975186421875
ifrd1	1.78844343232035	6.76312233917553	6.23064389085924	3.14729182254803e-06	0.000120659178447716	4.52580467860763
adh1c	3.35113124291237	4.72877035699299	6.22905794966895	3.15865782371161e-06	0.000120721172317966	4.52222252216833
mapk13	-1.26845424037705	5.89107695181181	-6.22594178660649	3.18111299884298e-06	0.000121205299275916	4.51518320292957
jund	1.96586833655397	8.75013388458279	6.22427891484828	3.19316248118375e-06	0.000121291199400302	4.51142635956281
gbp1	-1.93993057056118	7.87565913588329	-6.21491447169782	3.26189644023449e-06	0.000123523130334629	4.4902636952651
cd8a	-1.71853320928237	6.70161582580369	-6.21232689779614	3.28115457095334e-06	0.000123873588573522	4.48441424042888
pstpip1	-1.16288196039431	6.31419319429545	-6.2001242099621	3.37355367679694e-06	0.000126974818175612	4.45681838778649
tmem135	1.08313391833555	6.99738355368675	6.19032875523727	3.44964876023051e-06	0.000129445456357377	4.43465385140186
cybb	-1.5009704012361	6.48792056559674	-6.18490515501874	3.49253450148828e-06	0.000130658775625164	4.42237688139905
abhd5	1.1970500832227	5.72419093258403	6.17630105091066	3.56169130256584e-06	0.000132571228714128	4.40289347147383
gsn	1.54247137449173	9.9036525969993	6.17588550554211	3.56506655590766e-06	0.000132571228714128	4.40195228049837
nmi	-1.67354793690297	7.76894746199711	-6.16300760087783	3.67130485379766e-06	0.000136113077858013	4.37277454859253
inpp5d	-0.914163788617275	5.51359362971971	-6.16045535488742	3.6927415704589e-06	0.000136499160796993	4.36698960448655
znf395	1.60747834541161	8.14927062094168	6.14559577420447	3.82011729539661e-06	0.000140787239490763	4.33329388689616
bub1	-0.948605170695841	2.63954560249755	-6.1337850375852	3.92455801912882e-06	0.000144207127450659	4.30649372267299
itgb7	-2.31017711495247	4.10784659396773	-6.1314507190185	3.94554325437096e-06	0.000144549296209691	4.3011949524787
arap2	-1.71628886793189	5.78929201632114	-6.12620083297549	3.99315931064065e-06	0.00014586221753293	4.28927574225146
rpgr	1.2417428891149	5.84189325612625	6.12143341251516	4.03690844514564e-06	0.000147026580224231	4.27844919317093
trat1	-3.53148849217252	2.96218753400942	-6.11759469185655	4.07249119553522e-06	0.000147867344607432	4.26972979360038
cmtm6	-0.87164658141781	9.57853026618096	-6.11559452516447	4.09115851435723e-06	0.000147867344607432	4.26518588488773
btk	-1.21404715775535	6.50539721536956	-6.115096855746	4.09581678109901e-06	0.000147867344607432	4.26405522643127
ubd	-4.19939053772829	6.38124088845593	-6.1107413886771	4.13681678596321e-06	0.000148913378664484	4.25415881425641
atox1	-1.11613561947475	7.88686499552104	-6.10474242146541	4.19397584860808e-06	0.000150533341835692	4.24052455602073
nav2	1.73919275500626	6.86395285947041	6.09630859478687	4.27570320103703e-06	0.000153023216007056	4.22134955351952
fcn1	-1.76209603694117	6.27102034553053	-6.09012884172228	4.33661975728906e-06	0.00015475608776516	4.20729428492025
scml1	1.26401456538099	6.76202997826297	6.08860845641499	4.35174239195158e-06	0.00015484950011361	4.20383565263841
casp1	-1.32687550741125	6.9904620630925	-6.08665582896129	4.37124346606068e-06	0.00015509773020123	4.19939335786954
ssr4	-1.30524104961355	10.3713473023575	-6.05467455749047	4.70366730709263e-06	0.000166391328113197	4.12657412332138
mki67	-1.0588191860455	5.44710038370335	-6.05349468461873	4.7164141296723e-06	0.000166391328113197	4.12388544990057
lyz	-1.74483668382512	10.4428157525125	-6.04888013740619	4.76660762939902e-06	0.000167684381462636	4.11336841723481
rtn1	-1.98668065927919	5.87463836576222	-6.03967885577208	4.86832790799194e-06	0.000170777633101032	4.09239069639945
gpr65	-2.65478435461368	5.6632904346918	-6.03384424092267	4.93397632516305e-06	0.000172591606877102	4.07908368651829
akr1a1	-0.928593940006119	9.17938221217574	-6.02807237026779	4.99980901445005e-06	0.00017440178880545	4.06591608306809
pbk	-1.53462017987415	4.77436852611349	-6.02488749791646	5.03651853948448e-06	0.000175188789534934	4.05864873380554
cdc42ep4	1.27333680710039	5.9121202857412	6.01499088616321	5.15235616816429e-06	0.00017824758928693	4.03605920023612
foxo3	1.46814976154234	8.86868711842084	6.01491580246665	5.15324533349922e-06	0.00017824758928693	4.03588777671658
urgcp	0.883642239067125	7.15811872573402	6.01329690866742	5.17245497320806e-06	0.000178413676694249	4.0321915315756
zfpm2	1.5772445891296	5.87919414969417	5.9957753093297	5.38510573757728e-06	0.000185232678745609	3.99216803626592
arhgap8	1.95179066034986	2.22053140477904	5.98788508543146	5.48376172063091e-06	0.00018791614032178	3.97413397270165
lrmp	-2.35287238581237	5.45174178704251	-5.98679163676082	5.49757865328501e-06	0.00018791614032178	3.97163423003564
spock1	1.36049433579421	8.58497420035548	5.98591783703885	5.50864563811727e-06	0.00018791614032178	3.96963653559376
rbm47	-1.57043805582673	8.17538430838278	-5.96746568589766	5.7477384250206e-06	0.000195068589595533	3.92743166210999
larp6	0.991881850848801	7.69968357787374	5.96631636159617	5.76297683644747e-06	0.000195068589595533	3.92480164337346
rfx5	-1.00411335944314	7.32997742764564	-5.96612077997407	5.76557407671527e-06	0.000195068589595533	3.92435407640646
stxbp1	0.895348806286741	7.68769206061905	5.9625257734843	5.813527739069e-06	0.000196155078999704	3.91612656811501
isg20	-1.77989410954478	5.14471327812897	-5.955813214783	5.90415954436013e-06	0.000198671759885357	3.90076053607859
prkacb	-0.981232153928259	7.2669314715814	-5.94034305860854	6.118570114327e-06	0.000205328600882686	3.86532871835298
cd74	-1.3825663479067	11.950154312894	-5.93512383575195	6.19268682061849e-06	0.000207254164593834	3.85336920086421
mast1	-2.71334142851524	2.82933679441065	-5.92095283318984	6.398583185526e-06	0.000213240130352252	3.8208826694045
col5a1	-1.59913629830308	6.91714146710102	-5.91989297989508	6.41426037927246e-06	0.000213240130352252	3.81845213836786
tmsb10	-0.721679862124644	12.0164660360306	-5.91928935005547	6.423206704465e-06	0.000213240130352252	3.81706779842437
stat1	-1.82818132509625	7.04234349876974	-5.917736186828	6.44628455351566e-06	0.00021343406851921	3.8135056607199
ddx54	0.806461178720184	6.52532528370015	5.91008695861333	6.56118262289347e-06	0.000216658998451439	3.79595865347067
btn3a2	-1.98310868262041	6.40412868327347	-5.90172365169655	6.68920149118366e-06	0.000220298888471615	3.77676653873861
dpp3	-1.92044867622297	5.04653748475513	-5.89821676182619	6.74363825979674e-06	0.000221502579764093	3.76871674597047
serpina3	2.24402633685641	8.51397751472588	5.87115344061785	7.17924086033346e-06	0.000235186612628331	3.70655185509072
fam136a	-0.996884097394872	7.00782604440886	-5.86486349482392	7.28453096249208e-06	0.000238006192370816	3.69209286440901
tent5c	-1.17212463899062	6.37913967096182	-5.85219773295611	7.50135586427699e-06	0.000244445499124584	3.6629651180944
itm2c	-1.33598460533571	7.34473893012291	-5.84883034628297	7.56010260277324e-06	0.000245257638350239	3.65521828811981
gbe1	0.833184641286566	8.78948000780581	5.84745859268242	7.5841683049144e-06	0.000245257638350239	3.65206217203055
grb2	-0.82349141057502	7.9066991402542	-5.84737165466646	7.58569615506271e-06	0.000245257638350239	3.65186213947713
ptpre	-0.903340696354396	8.00123819762849	-5.84555797171399	7.61764156273776e-06	0.000245649102790056	3.64768892525674
ets2	1.28990361241238	7.93191643189533	5.84222552390859	7.6766960888853e-06	0.000246910461477056	3.64002021524888
prss23	-1.19157454429304	8.88057907309424	-5.8349006633929	7.8081476503389e-06	0.000250487804026287	3.62316008474114
zfhx3	1.3684717823934	6.44824031422556	5.82181542979556	8.04871852089758e-06	0.000257538194946446	3.59302733291269
adap2	-1.03914801065775	8.18361331198057	-5.81966698314715	8.08893425642206e-06	0.000258157919838336	3.58807821930698
wee1	1.15976297602719	6.42118418324944	5.80802894596919	8.31037120876511e-06	0.000264543256242001	3.56126100217873
rbms3	0.995505235202471	7.26415157315895	5.80254314608025	8.41688422777574e-06	0.000267246865109095	3.54861549531855
pik3cd	-0.737693627343726	6.70634009141407	-5.80061192819254	8.45471151617561e-06	0.000267761362416375	3.54416305989798
nlgn4x	-1.93936192718951	5.90253151227541	-5.79876835210151	8.49098391004502e-06	0.000268224116729815	3.53991233472449
cyth4	-0.998477510514645	6.56714115444223	-5.7953265815179	8.55912612579832e-06	0.000268753985519976	3.53197574975225
cx3cr1	-1.99448603048963	5.97566514165663	-5.79504158111208	8.56479367734959e-06	0.000268753985519976	3.53131849716444
pard3	0.940513309553976	5.03327543059597	5.79463588569418	8.57286798678757e-06	0.000268753985519976	3.53038289024557
mthfd2	1.35723889181592	9.09657605893139	5.79187726092922	8.62797747712856e-06	0.000269586743685223	3.52402056751862
msl3	-0.882312099833495	6.27498855200518	-5.79112972691621	8.6429732086759e-06	0.000269586743685223	3.52229637024556
nfkbia	1.3244023485915	11.3996253294392	5.78815097359284	8.70299226050824e-06	0.000270776766738376	3.51542528248127
vegfd	2.39427126933471	6.09417124967593	5.78265738518826	8.81480006140079e-06	0.000273175224844931	3.50275091100314
btn2a2	-1.62479732932092	5.52807707507479	-5.78219868519238	8.82420172316664e-06	0.000273175224844931	3.50169249910252
traf3	-0.716183603271493	6.21473314765561	-5.7665823612226	9.15045405823016e-06	0.000282554443760267	3.46564670889476
themis2	-1.30181065453716	7.88264171843808	-5.76553322513423	9.17280839793485e-06	0.000282554443760267	3.46322421697538
jun	2.06536875474961	8.94390082422833	5.76385732258852	9.20863306862972e-06	0.000282954102453702	3.45935427461792
il1r1	1.78910417784335	7.84671239907344	5.76030876065369	9.28495992335897e-06	0.00028459321468058	3.451159133593
lama3	2.75114689972858	4.7850284994891	5.74926859077734	9.52657631073217e-06	0.000291278011001966	3.42565478178853
ltbp4	1.74828143445149	6.33260252445603	5.74077010930594	9.71692677659463e-06	0.000296366266686136	3.40601397958569
slc16a7	1.46017062756662	7.23905470814201	5.73780913650563	9.78415420850521e-06	0.000297683492786044	3.39916923792531
gzmh	-2.79294175636847	3.96372283578254	-5.73523209085784	9.8430505967403e-06	0.000298338727716191	3.39321130997185
sox9	1.75326651563681	7.29898466366357	5.73476015371643	9.85387544503935e-06	0.000298338727716191	3.39212015845483
ebf2	1.23825503141552	6.33262479541607	5.72704040552911	1.00326765730395e-05	0.000303011302448654	3.37426850321113
foxo1	1.47761442902066	8.22548847510543	5.70965563752382	1.04475427021251e-05	0.00031435084141038	3.33404579337941
idh2	-1.38231821272167	6.55685179358426	-5.70918970759544	1.04588990277862e-05	0.00031435084141038	3.33296738391859
col1a2	-1.68064067142101	11.3698755436572	-5.76254749174223	1.10776023587593e-05	0.000328167344517981	3.31980473018612
sgpl1	-0.629244793746242	5.36079654294192	-5.7013611195459	1.06516014985829e-05	0.000319367509338866	3.31484477125607
tpd52	-1.62233734175124	5.05339353180241	-5.69888708945842	1.07132497140495e-05	0.00032044002707506	3.30911635698745
entpd1	-1.34451285141973	7.10410324679191	-5.69345407601346	1.08499093961687e-05	0.00032374560976568	3.29653461806492
spock2	-0.905399378671148	6.71783832076352	-5.68727482820968	1.10075004280339e-05	0.000327283088169211	3.28222135433487
cfh	1.16199310200346	9.11031985440315	5.68673712671303	1.10213234084278e-05	0.000327283088169211	3.28097568193937
trpv2	-0.949664480801252	7.03472032977065	-5.67854563211629	1.12341072906911e-05	0.000332009428593383	3.26199539007681
psmb8	-1.49624705148213	7.75940679351931	-5.67039154102754	1.14500778801957e-05	0.000337586462834438	3.24309550110823
ssrp1	0.804641252884972	7.16322391021837	5.66844326169509	1.15023034863264e-05	0.000338320722259336	3.23857877704134
cdk5	-2.3397293392702	4.06901565507539	-5.66449955622703	1.16087625583699e-05	0.000340642907014915	3.22943494245444
cidec	1.56540439840877	7.53019349530694	5.66335950919829	1.16397244008338e-05	0.000340662688033745	3.22679137089241
man2b1	-1.11711160159021	8.59786496022044	-5.66245102087379	1.16644577021972e-05	0.000340662688033745	3.22468465713906
mt2a	0.934790341559399	12.9191983312963	5.65975195986761	1.17382550438658e-05	0.000341979324228587	3.21842529136739
ston1	1.12783072384613	6.47481208021794	5.65878628912525	1.17647736510844e-05	0.000341979324228587	3.21618564927641
tmem104	-1.72316922872308	5.22175654121054	-5.64091531792365	1.22667016204556e-05	0.000355734346993212	3.17472261912293
adgre2	-1.95885990702105	5.3594340383518	-5.62699365628497	1.26727848597522e-05	0.000365942283614261	3.14240214456383
stk10	-1.28286541322106	6.7090423846564	-5.6268244627141	1.26778034135927e-05	0.000365942283614261	3.14200923642422
btg1	0.933557092163182	10.7924165159571	5.62408076522113	1.27594690128222e-05	0.000367443034385528	3.13563734714821
aoah	-2.64976042708781	4.34254966691329	-5.61210740166538	1.31221714189502e-05	0.000377011249839582	3.10782272358821
prkx	-0.99352628496224	6.30687475735334	-5.60822637851836	1.32419764506146e-05	0.000378716102438206	3.09880415976418
vav1	-1.30584554354484	6.56547316008657	-5.60820378189023	1.3242677247496e-05	0.000378716102438206	3.09875164665891
hsd11b1	1.06297166803674	7.27282711763537	5.60564001872627	1.33224338018943e-05	0.00038011911928308	3.09279332780776
bnip3	1.23019697285038	7.23890725240903	5.60238998826943	1.34242430066287e-05	0.00038214345092203	3.08523923785744
vgll4	1.07994553525546	8.3685710469085	5.60039627013702	1.34870891237844e-05	0.000383051891329867	3.08060474204321
tacc3	-2.12888300200515	3.72291813881082	-5.59510325867609	1.36553930569129e-05	0.000386944467331243	3.06829914781389
nol3	1.52713581489374	4.72605015026782	5.58077182331804	1.41219090924847e-05	0.000399133282975494	3.03496779104089
atp2a3	-1.35846112495932	3.34023270522229	-5.57952153197711	1.41633702722438e-05	0.000399133282975494	3.03205905868645
il2rg	-1.94783083317486	7.31956979927749	-5.57895381620644	1.4182237301883e-05	0.000399133282975494	3.03073825424451
gimap6	-1.33314320114322	7.468540929976	-5.57798257010154	1.42145742918289e-05	0.000399136220988022	3.02847856061151
col5a2	-1.34848388806087	9.56046321177426	-5.57655459645592	1.42622540665289e-05	0.000399568986664768	3.02515609675687
pparg	1.40324297168282	6.27093768437298	5.57463083803395	1.43267455093371e-05	0.000400469728311786	3.02067980648485
trhde	3.56655843495261	4.28639787429042	5.57287218555265	1.43859616944784e-05	0.000401219287528661	3.01658740662215
ddr2	1.29536879648677	8.21060325330883	5.57165327064058	1.44271503128317e-05	0.000401463825446731	3.01375082088129
mt1e	1.40891900871785	11.6539659360484	5.56706499127194	1.45832731606297e-05	0.000404898366699724	3.00307207961001
col1a1	-1.96324944776993	7.81370023553704	-5.56129455290668	1.47820646856996e-05	0.000408905912373281	2.98963936308049
sdc4	1.91744124876294	8.8186231380634	5.56096051092502	1.4793656524528e-05	0.000408905912373281	2.98886167407115
ctss	-1.6176589202812	8.77540600961541	-5.55147776245752	1.51266121897276e-05	0.000417095158000935	2.96678065852342
dusp8	1.31808274426732	6.03150388699922	5.5506145297669	1.51572979972883e-05	0.000417095158000935	2.96477019274746
cdo1	2.08899093165788	9.88242598500493	5.5483298254988	1.52388197041146e-05	0.000417954315164077	2.95944881266845
march1	-1.09616996546792	6.4081558373551	-5.54610322419766	1.53186975370111e-05	0.000417954315164077	2.95426232661556
tyrobp	-1.20249902257372	9.61184726975939	-5.54554262553829	1.53388756957049e-05	0.000417954315164077	2.95295644046809
iqgap2	-1.26263300090054	7.33578196429574	-5.54512100568205	1.5354069277319e-05	0.000417954315164077	2.95197428047324
cxcl6	-2.60290572311304	6.17955018112503	-5.54503192894888	1.53572812242312e-05	0.000417954315164077	2.95176677498623
klhl26	1.42532300551694	6.32976118407526	5.54343835019626	1.54148584820135e-05	0.000418601299523626	2.94805439519394
fcgr2b	-1.99950057752694	9.20818817201836	-5.54240747195768	1.5452221891577e-05	0.000418697732348793	2.94565275808449
ppl	1.58592672713655	7.59301516267135	5.53964903089647	1.55526533824529e-05	0.000420498923220337	2.93922596655879
ccl25	1.53868171696072	3.73948761399568	5.53698115610051	1.56504193427521e-05	0.000421897682191799	2.93300955812633
fmo2	1.62034924265936	8.0995975078996	5.53638015487166	1.56725295815414e-05	0.000421897682191799	2.93160908209819
slc35f5	2.49674886702387	1.60504936500444	5.53521350566743	1.57155402228427e-05	0.000422137819044385	2.92889042287425
eif1b	0.802209882234523	9.31020925160453	5.53172627966783	1.58448205507312e-05	0.000424689205367325	2.92076339359863
srgn	-0.989047512460385	10.2219645442079	-5.52964873582899	1.59223542219436e-05	0.00042584559898559	2.91592115272304
lasp1	-0.897129908586486	9.28714129135997	-5.52492644678778	1.61000285483229e-05	0.000429669511883367	2.90491329130546
dock2	-1.67926493907089	6.98822435150463	-5.52274428002305	1.61828118961496e-05	0.000430950020881764	2.89982592239953
hla-dqa1	-3.12790214125012	7.63639098498328	-5.51718264221353	1.63957637953556e-05	0.000435683998021219	2.88685803023456
srsf7	0.766956858992438	8.25011588939496	5.51509535879792	1.64764184955822e-05	0.000436889700708339	2.88199050062363
ncf2	-1.71528798908385	7.99394725800673	-5.50894165699731	1.67165606755876e-05	0.000442104806149631	2.86763796680437
hirip3	-1.28182005525201	5.58063836694432	-5.50823153047983	1.67445008547345e-05	0.000442104806149631	2.86598150343245
opn3	-0.882864213116073	7.08679993540789	-5.50420082789647	1.69039927709895e-05	0.000445366260602473	2.85657855531673
speg	1.63806883003163	6.15792634130603	5.49649002526015	1.72134227699562e-05	0.000452096632785891	2.83858675326347
hla-drb1	-1.49760265814308	12.1327685583039	-5.49602012691781	1.72324647238101e-05	0.000452096632785891	2.83749016714624
adipoq	3.24880476702033	6.10381856655568	5.48956661829806	1.74961621566206e-05	0.000458044346692247	2.82242796471491
tbc1d9	-0.734751117877028	7.16387776182131	-5.48570893743142	1.76557474534301e-05	0.000461247090117774	2.81342265368784
shcbp1	-1.23916472231296	4.50306705133561	-5.48024795585748	1.78841932025514e-05	0.000466231504057251	2.80067251269104
micb	-1.08601755595894	6.88172120498747	-5.47722937722669	1.80117551974739e-05	0.000468570513887226	2.79362376534326
ncf4	-1.14756659755241	7.24627703520564	-5.47276041971191	1.8202309822411e-05	0.000472535015788083	2.78318682906354
nr4a1	1.66560525308106	6.04172760706837	5.46653621719169	1.84711287653395e-05	0.000478510434102928	2.76864790945667
cxcr6	-0.899431921977246	4.8657718500437	-5.46096314286907	1.87152504245131e-05	0.000483495920298124	2.75562725223223
parp4	-0.698815379019855	8.64689944878051	-5.46036455176768	1.87416653269078e-05	0.000483495920298124	2.75422858283796
cx3cl1	1.57595655974147	6.27029822182997	5.45609950447976	1.89309758489903e-05	0.000487364394881594	2.74426202019712
khdrbs3	0.903434038078818	7.47731493209993	5.45337308489213	1.9053009623405e-05	0.00048948841943283	2.73789014970938
cd3e	-1.1640213421274	6.77021424572085	-5.44799107143326	1.92962600370493e-05	0.000494711362399133	2.72531017010439
pxdc1	1.04280151039454	8.46079881465833	5.4439250534271	1.94821233513889e-05	0.000498444490620349	2.71580466515917
arg2	1.17194079578065	5.08832405832137	5.44110509247109	1.96120955762036e-05	0.000500193140769607	2.70921140259458
srpx	1.29072782293879	9.33268449908004	5.43955065486436	1.9684116240356e-05	0.000500193140769607	2.70557674809086
lyn	-0.883188549222664	8.18026553974661	-5.43952950162213	1.96850981706844e-05	0.000500193140769607	2.70552728531362
wbp4	0.617805951484033	6.23611585153702	5.43894941849956	1.97120449564377e-05	0.000500193140769607	2.70417085885499
taf7	0.870576603382913	8.9688919506558	5.43493242543338	1.98996794051349e-05	0.0005039217383922	2.69477706076764
ubap1	0.832457829610395	8.02075119873231	5.42317680952367	2.04592844971764e-05	0.00051703534679293	2.66727900129594
ass1	1.40056603569854	9.47291358214415	5.41930399802956	2.06471246127238e-05	0.000520018655701112	2.65821754858582
bin2	-2.16223761144657	4.85251218581921	-5.41901269228842	2.06613242836911e-05	0.000520018655701112	2.65753591502306
gng7	-1.18628849806302	4.25489940703196	-5.4121045457975	2.10009853960638e-05	0.000527125137719693	2.64136941727974
folr2	-1.13071703054589	9.34083367890848	-5.4115435763448	2.10288151525098e-05	0.000527125137719693	2.64005646800548
ntrk2	1.11044987577576	6.19846370072021	5.40475270125686	2.13686993485579e-05	0.000534562836430691	2.62416047245398
fbl	0.858412628145524	9.52220333827593	5.39661538955076	2.17833352441858e-05	0.000543836774856357	2.60510803298121
tmx4	1.11001231476681	6.78231391691455	5.39563525207506	2.18338266735144e-05	0.000544000554724604	2.60281282486547
foxo3b	3.49565406419953	6.37967836343932	5.39414532487829	2.19108076190883e-05	0.000544822350897933	2.59932368967747
hbegf	1.65721594237154	6.4349565477608	5.39253100155412	2.19945271420301e-05	0.000545808075350219	2.59554304855419
adh5	1.06687492909055	8.5388970332439	5.39113190923489	2.20673475718743e-05	0.000546519929965039	2.59226630231116
slc46a3	-1.41409130824062	6.70805560124133	-5.38313441006447	2.24883318754021e-05	0.000555354173383073	2.57353286457314
pnoc	-2.16143477415041	5.71204464891551	-5.38228395220798	2.25335768870219e-05	0.000555354173383073	2.57154045409891
melk	-1.90810394577332	4.73399724467009	-5.38181433629971	2.25586004370254e-05	0.000555354173383073	2.57044023759977
lbr	-1.22791999364766	7.51926003986154	-5.37155980030583	2.31121099521398e-05	0.000567851701462991	2.54641172238813
txndc5	-1.15077923348634	10.1836208596882	-5.36870391226527	2.32687047313179e-05	0.000570567070669128	2.53971836375624
rgs16	1.56458024572889	7.81685787235646	5.36695259441231	2.33652661295925e-05	0.000571802550361153	2.53561348745876
rhoh	-2.61395252413605	5.54678480853972	-5.36388699793839	2.35352731176992e-05	0.000574826996087711	2.52842754635098
march2	-0.935451876021408	7.1932199877644	-5.36051404064481	2.37237775207172e-05	0.000578290427242208	2.52052031836367
arel1	-0.855020060672403	6.77705664674669	-5.35740319238206	2.38989927556343e-05	0.00057981028127249	2.51322679834518
ifi30	-1.95609042063803	10.9271071575488	-5.35728394419176	2.39057353812117e-05	0.00057981028127249	2.51294720135876
glb1	-0.89624173570121	8.36861588413492	-5.35675497773427	2.39356679237656e-05	0.00057981028127249	2.51170693975092
cebpz	1.01399154084453	7.0968618680867	5.35608877619771	2.39734203352592e-05	0.00057981028127249	2.51014487494055
fcgr3a	-2.20136661849697	8.80168127687422	-5.35453044679161	2.40619643507342e-05	0.000580817357807294	2.50649087924847
acacb	1.88273064061923	6.10162463398641	5.35115200419219	2.42550692847124e-05	0.000584339538818275	2.49856843291197
pvrig	-2.01728039801933	5.62204363612856	-5.3440731926449	2.46647997449202e-05	0.000592300793931077	2.48196588085124
nagk	-1.43181239548021	8.56113903655839	-5.34379246531555	2.46811927374978e-05	0.000592300793931077	2.48130739036102
lpp	0.801849060100076	7.72515876868011	5.33796293288904	2.50241184683772e-05	0.000599368779485329	2.4676319873886
rbpms	1.22433392300512	6.45773663444718	5.33713726700979	2.50730784341352e-05	0.000599382104729529	2.46569486994619
efhd1	1.3589166310885	7.57294846783365	5.33142011474384	2.5414770960656e-05	0.000605782856300754	2.45228033453855
rsrc2	0.736692040539757	8.20179691539234	5.33102311796825	2.54386727995148e-05	0.000605782856300754	2.45134874602552
mt1h	1.35051288028221	11.8231049001225	5.32755076563991	2.56487068000573e-05	0.000609612161814029	2.44320007160933
fap	-2.72750794800826	7.15861749752879	-5.3267011125829	2.57003678141623e-05	0.000609669836480406	2.44120603172797
cr1	-1.45348129032603	4.93453452696196	-5.32554526561221	2.57708158512611e-05	0.000610172108386552	2.43849330526787
kif4a	-1.66268119018837	4.44020529239583	-5.3239990993067	2.5865360248507e-05	0.000611241900681797	2.43486436376758
kynu	-1.39206366061454	6.47229783796022	-5.32259820705391	2.59513255551483e-05	0.000612105265427432	2.43157623960468
ccr7	-1.80590510710981	6.07036462302376	-5.31857105264469	2.62000697289403e-05	0.000616797459037011	2.42212305845788
ssr1	-0.750460925509808	8.35583233177075	-5.31333832400707	2.65268984372472e-05	0.000622299569359899	2.40983821897392
akr1c2	1.08521654338214	10.3544343577554	5.31322066232841	2.6534294809176e-05	0.000622299569359899	2.40956196293642
csta	-0.849936720307708	7.52612844979904	-5.31193615988616	2.66151766855697e-05	0.000623016508312683	2.40654603509796
dlc1	0.826504184648624	6.77495838540126	5.30366629578963	2.71419365903269e-05	0.000634148303392488	2.38712611814375
batf	-1.85404758718649	6.16209304939309	-5.29620474484492	2.76262886547241e-05	0.000643815582390938	2.36960018283177
ccr1	-1.70811503943401	8.15246682046202	-5.29569515761291	2.76596858460776e-05	0.000643815582390938	2.36840310446627
kiaa0930	-0.831022617484151	7.48148533510884	-5.29390176490558	2.77775469737392e-05	0.000645345899016534	2.3641900759234
lmod1	2.77592932955937	4.90574073135383	5.29228276723533	2.78843846997866e-05	0.000645690434740564	2.36038654142979
txndc9	-0.733876121147516	8.01091334894616	-5.29209710213244	2.78966633760964e-05	0.000645690434740564	2.3599503439937
cmklr1	-0.8503503074779	6.85481561237916	-5.29024710246815	2.80193104397111e-05	0.000647319255923399	2.35560386439262
nnmt	1.25052237217549	11.2269791403815	5.28625638514855	2.82857449135744e-05	0.00065225768950613	2.34622706402559
trim22	-1.31608648230578	8.90187712177851	-5.28308936133198	2.84990157212944e-05	0.000655954110923398	2.33878486813648
ido1	-1.3397991170121	6.25232200586504	-5.27803945592879	2.88424631359397e-05	0.000662627497239965	2.32691664611586
nr1h3	-1.04046293096144	8.26025502499602	-5.27531073032129	2.90297906326876e-05	0.000665696106304759	2.32050289750287
kcnab1	1.47881048576647	4.75510412506136	5.26494654193382	2.97526157353339e-05	0.000681002860685707	2.29613767455552
fbp1	-1.61109553408398	8.02233390202773	-5.26417315971041	2.98072801818342e-05	0.000681002860685707	2.2943192321809
hif3a	1.38166484601715	4.63654273296904	5.26070185788342	3.0053897876744e-05	0.000685372776073151	2.28615671004844
fcmr	-2.07837753272464	5.4639260621299	-5.25474715771021	3.04817800812665e-05	0.000693852725636623	2.27215275126665
apol1	-1.63209222706482	7.15763798644906	-5.24981473705095	3.08408823250773e-05	0.000700591937578872	2.26055112866203
adora2a	-0.903629269899573	5.6956332058318	-5.24878694738233	3.09162487270622e-05	0.000700591937578872	2.25813344335279
spen	0.937269206231614	8.09292783676534	5.24836052559816	3.09475724667401e-05	0.000700591937578872	2.25713034414438
cyfip2	-1.20993951343593	5.47856483692982	-5.24670683765223	3.10693525597755e-05	0.000702065315233029	2.25324015339363
chn1	-1.84022852595491	6.6771286244231	-5.24523170896576	3.11783934872462e-05	0.000703245986434553	2.24976985739561
nup210	-1.41364135542347	4.46849624181989	-5.24360939788882	3.12987624171132e-05	0.000703793841388455	2.24595314187442
dennd1b	-2.1557658803363	5.98771655922789	-5.24337283729126	3.13163535980811e-05	0.000703793841388455	2.24539658508873
slc36a1	-1.04440744608546	7.21098529263179	-5.24193872337067	3.14232124727551e-05	0.000704288278540592	2.2420224616056
ggh	-1.16372594699978	5.60856539922594	-5.24155181496483	3.14521051468099e-05	0.000704288278540592	2.24111213623415
cxcl9	-2.4986778906605	8.15150315139607	-5.23162393111058	3.22027667211344e-05	0.000719795776728894	2.21775023923589
ca2	-2.32197943420359	4.62888811826452	-5.22903514259642	3.24014790706494e-05	0.000722932460057391	2.21165734026212
olfm1	1.1674974633089	6.59462949575171	5.22344875489685	3.283453191861e-05	0.000731276994151344	2.19850788507611
cpvl	-1.49412746358528	8.11446682642726	-5.21828984173078	3.32396599745354e-05	0.000738970753078406	2.18636283413579
spcs3	-0.920994754841041	7.88148382927649	-5.20429891594658	3.43640692533036e-05	0.000761460474261967	2.15341694086443
c1orf21	2.29207364096336	4.26732594999435	5.20417430308164	3.43742554399128e-05	0.000761460474261967	2.15312344574791
c2	-1.33844426535989	8.35968907497565	-5.20037127014313	3.46866023929048e-05	0.000767007495413107	2.14416585826948
st6gal1	-1.52152326757231	4.92072611221653	-5.19478025927972	3.51510313810725e-05	0.00077589166059148	2.13099524379092
lgmn	-1.14096387315671	9.39027505806403	-5.18083770325475	3.63368568703353e-05	0.000800639321397441	2.09814256369927
cnn1	2.49044530232169	5.99380921762909	5.17414552259176	3.6920357527493e-05	0.000812051131905766	2.08236958179726
ccr2	-1.11545126901042	5.8505377278942	-5.17299789986256	3.70213703157351e-05	0.000812829128758419	2.07966444266124
mt1f	1.23965956353893	10.741492544025	5.17063637383977	3.72301120798879e-05	0.000815438571352686	2.07409767684206
gng5	-0.581072003723671	10.377644364998	-5.17016496632723	3.72719237168392e-05	0.000815438571352686	2.0729863990589
smpdl3a	-1.38759620504784	7.65184265435991	-5.16729136809534	3.75278298021376e-05	0.000819589270617055	2.06621199764375
gnptab	-0.702734842678686	6.86885763341047	-5.16579900504645	3.7661432922784e-05	0.000821059020920483	2.06269360922037
aga	-1.03410215048376	6.28741113149751	-5.163584879205	3.78605402965749e-05	0.000823949157280293	2.05747334764606
gpr137b	-1.251553495717	7.90728812694166	-5.1596840915569	3.82139215918857e-05	0.00083018068609179	2.0482757108196
sh2b3	-0.78399229992449	8.44364566468584	-5.15733413921956	3.84284208445422e-05	0.000833378520696964	2.0427343349308
stbd1	1.27656076749371	6.31584960769694	5.15571974760351	3.85764861988321e-05	0.000835126973077164	2.03892727842573
mycbp	-0.79011643990832	5.54679727285743	-5.14027750875583	4.00223323171717e-05	0.000864915429465161	2.00250358489122
ppfia2	2.06804394261213	3.99350650658669	5.13503043714098	4.05260127305867e-05	0.000873862486264235	1.9901240960586
pnpla2	1.6012236503228	7.69213530434727	5.13426926254987	4.05996114745772e-05	0.000873862486264235	1.98832811311508
wnt5a	-1.69363943748741	3.88680675961054	-5.13314555773316	4.07085112452271e-05	0.000873862486264235	1.98567668267972
mapk8	1.78723860031175	4.43023643809576	5.13304141702471	4.07186186363937e-05	0.000873862486264235	1.98543095443648
capg	-1.46447007758874	8.30824535354411	-5.12326764552854	4.16786197769921e-05	0.000892917558301892	1.9623661817915
abca8	1.89499950102788	7.52517172901908	5.11056729194885	4.29604238987383e-05	0.000918789169495815	1.93238692533794
adam12	-1.35689033522265	4.62538758487907	-5.10690692175891	4.33372136435287e-05	0.000925249511289338	1.92374491250746
pid1	1.8603959400541	7.23840763680828	5.10585664013804	4.34459438711343e-05	0.00092597439407273	1.92126509406718
tsc22d1	1.15551560974482	9.98287005417446	5.10035118663784	4.40204317258757e-05	0.000936606539624602	1.90826517173242
dcaf1	1.2537649409416	4.46390334728427	5.09263789227383	4.48382709201603e-05	0.000952371027108654	1.89004910079548
racgap1	-0.873863389443804	6.01096222088145	-5.08020032395772	4.61895664992004e-05	0.000978312901555008	1.86066913345159
nap1l1	0.880056092242761	9.34065078907477	5.07994584637843	4.6217640911708e-05	0.000978312901555008	1.8600679205175
abcc10	-0.742964934786644	7.19951683011434	-5.07502659434192	4.67637494760614e-05	0.000988183463757795	1.84844532045362
clk1	1.00613833529288	8.04082162908335	5.07289845732913	4.70020239157793e-05	0.000991526511327249	1.84341682213297
clec4a	-1.95708858091446	5.11444522768635	-5.06951794323498	4.73830491131088e-05	0.000997864450965351	1.8354286337788
dck	-1.3439743494963	6.48215932531044	-5.06634198223406	4.7743867489491e-05	0.00100375604604816	1.82792325731769
map1lc3b	0.679180632340366	9.07946697688	5.06196473911581	4.82457261395244e-05	0.00101258784200971	1.81757816484035
wnt11	2.07595886069481	3.32453209954972	5.06111206417541	4.83441065734083e-05	0.00101293582351694	1.81556285285059
hnrnpa1	0.864922220707117	9.33669801065023	5.0503803485052	4.95998198532586e-05	0.00103701275673398	1.79019504053231
slf2	-1.07324532315375	5.7105726838781	-5.04986698199731	4.96607094196277e-05	0.00103701275673398	1.78898138766749
cd38	-1.90880992941328	6.53969993934277	-5.04162488939145	5.06487142785657e-05	0.00105586368503616	1.7694943720257
zhx2	0.895869666026436	7.66327940934578	5.04023032715464	5.08178419769472e-05	0.00105760897008494	1.76619682885595
cbs	1.50257786696721	6.0253672541722	5.03842099200576	5.10381240449958e-05	0.00106041122491474	1.76191837957353
acadl	1.80453530905249	3.37357006790229	5.03612922990984	5.13185281813356e-05	0.00106445114651504	1.75649892278281
bcl2a1	-1.89664355495459	5.74311771361554	-5.03018457352194	5.20531640699703e-05	0.0010765789459858	1.74244004567914
lef1	-1.23631367906027	3.75772678371899	-5.02999227710914	5.20771047924975e-05	0.0010765789459858	1.74198524303967
aoc3	1.0554174487787	7.64025409641157	5.02838192644951	5.22780297882126e-05	0.00107893140477906	1.73817651106552
atm	-1.19268727422483	6.44565857387891	-5.02439184291028	5.27792627911239e-05	0.00108746357927202	1.72873878826714
hpse	-1.93286127895596	5.84150174003761	-5.02242655255115	5.3027926547756e-05	0.00108981098561524	1.72409001135673
tgif1	1.02970382778742	7.7384411869675	5.02182941040065	5.31037161543156e-05	0.00108981098561524	1.7226774699891
tdo2	-1.33468180184848	5.90313748609415	-5.02080787448953	5.32336242597633e-05	0.00108981098561524	1.72026098382213
ldlr	1.51101877912486	4.31627698071577	5.02071675853215	5.3245227028767e-05	0.00108981098561524	1.72004544272928
ereg	2.20937023561114	5.10674963013731	5.01777036417045	5.36218052962836e-05	0.00109570761548495	1.71307532637802
tcl1a	-1.12030683286019	5.74424717530131	-5.0169219499867	5.37307398660115e-05	0.00109612479697005	1.71106820369846
moxd1	-0.978224618104978	6.04426752966839	-5.01327035497014	5.42021584555864e-05	0.0011039232370979	1.70242910395109
pnrc1	1.41479216735719	9.85851445439592	5.00776184719108	5.49212334183588e-05	0.0011167317461733	1.68939563329251
trim14	-1.01878013068379	5.74440682972729	-4.99555532765703	5.6549240075709e-05	0.00114639245772732	1.66050914593818
kcnn3	-0.656456436049484	2.28571459049599	-4.99515273336966	5.6603758648323e-05	0.00114639245772732	1.65955629599611
slc25a36	0.739717696198497	8.2745769644278	4.99475485586918	5.66576907154261e-05	0.00114639245772732	1.65861460225111
hspb1	0.861775774970091	10.4258844317632	4.99382210300873	5.67843286689035e-05	0.00114708049250739	1.65640694045863
glrx	1.17755511019996	9.7545125147145	4.99082380801775	5.71933436090881e-05	0.00115229358538064	1.64931023226825
ccl18	-4.45261894106231	8.94581942772279	-5.02879827318564	5.9739261070734e-05	0.00117607515077726	1.64922216445391
rgs19	-0.931099890032671	7.56468731182341	-4.99056708279196	5.72285031905915e-05	0.00115229358538064	1.6487025663609
grpel1	0.887099349046276	7.31117924299528	4.98973272550669	5.73429229200071e-05	0.00115272307551696	1.64672763056302
fcgr1a	-1.53197642140038	5.48466450697926	-4.98891118192751	5.74558115109518e-05	0.00115312044398722	1.64478299382155
nr1d1	2.77840485418339	7.74571829414863	4.98608171856926	5.78463320389091e-05	0.00115748219634652	1.63808526962804
hes1	1.09378880582977	5.4274281103933	4.98598239846002	5.78600887941931e-05	0.00115748219634652	1.63785015880561
rgcc	1.23845283582456	10.283060030571	4.98343120654032	5.82145888028389e-05	0.00116146863508717	1.63181081705477
gramd1b	0.782859930355084	7.40866685917529	4.98319907581936	5.82469532737732e-05	0.00116146863508717	1.63126128798707
kcne4	1.09686253669695	6.92024505606973	4.98101261321314	5.8552691795852e-05	0.00116549798261497	1.62608509895632
foxc2	2.20977889025594	3.92114729761682	4.97976049370118	5.87285090988213e-05	0.00116549798261497	1.62312075854798
ptprg	1.32962101759682	6.84637615590367	4.97951903262439	5.87624753929888e-05	0.00116549798261497	1.62254910147143
fstl3	1.7770358608779	6.22033009464764	4.97853275231021	5.89014217232555e-05	0.00116549798261497	1.62021406390964
plac8	-1.58340877037211	6.31550096007937	-4.97789752045412	5.89910885035322e-05	0.00116549798261497	1.61871011721404
mab21l2	1.76889148339784	5.55372973066437	4.97773715059527	5.90137474844209e-05	0.00116549798261497	1.61833042981042
arhgap45	-0.838379196047828	6.61105400743305	-4.97651645776835	5.91865103505669e-05	0.0011670486587119	1.61544031230894
pim1	1.42493260462205	8.30537176341161	4.96947613576268	6.01929455689702e-05	0.00118312578568343	1.59877032292207
grb10	0.873692802031609	6.93174529515955	4.96738314243113	6.04954693285821e-05	0.00118718763343238	1.59381413651645
skap2	-0.903305360360114	5.92147040906065	-4.96244626347308	6.12151559643778e-05	0.00119941024732103	1.58212289961978
gas2l1	-0.83138961668542	5.5517889837256	-4.95969983665844	6.16192646939349e-05	0.00120542078152448	1.57561850897805
map4k1	-1.26216877573266	3.95307299614614	-4.95769583578824	6.19158340853296e-05	0.0012093119455499	1.57087220789057
sema4c	1.23266769339455	7.29551870519816	4.9537624211235	6.25021374760553e-05	0.00121884089506455	1.56155575791547
ccdc59	1.04722514391827	7.37936319226451	4.95171744408655	6.28091701614635e-05	0.00122104526821949	1.55671188733425
twf2	-0.756246937727471	6.82843009748457	-4.95169604646025	6.28123908467914e-05	0.00122104526821949	1.55666120253423
gap43	-1.52510954726987	4.64536391815664	-4.94962283453849	6.31252354642937e-05	0.00122520343378425	1.5517502700304
rpn2	-0.668295267712805	10.4975015855285	-4.94779327826401	6.34026209210281e-05	0.00122866143171376	1.54741634751135
kpna2	-0.786385063720759	8.35370146019237	-4.94677012653903	6.35582814107446e-05	0.0012297534354832	1.54499260538625
tapbpl	-1.3586314671332	6.35053206585348	-4.94551864893608	6.37492043402326e-05	0.00123152324078799	1.54202792284206
rab31	-0.754090641981685	9.34367852061974	-4.94102860121027	6.44389809105852e-05	0.00124290950251679	1.531390705466
lrrc8d	-0.895290408241083	7.55025551159331	-4.9379949478399	6.4909286874963e-05	0.00125003374708035	1.52420330860347
axl	0.922686140485176	7.79088896481382	4.93219395075207	6.58182953625267e-05	0.00126435434320787	1.51045840945539
h2afy2	-1.57684007971696	5.13720464530831	-4.93194807566728	6.58571066275598e-05	0.00126435434320787	1.50987580201329
slc7a1	0.744373387025066	4.90539426352007	4.93123966739496	6.59690579055465e-05	0.00126454310223589	1.50819719637841
trank1	-0.670347312103596	6.84909275446803	-4.9294511783393	6.62525531615807e-05	0.00126801447573393	1.50395919979596
flvcr2	-0.91852680204315	7.17943393733336	-4.92832322878733	6.64319784048129e-05	0.00126801633939148	1.50128634860745
sh3bp5	1.04962993479278	9.34070566458856	4.92816335177074	6.64574500738975e-05	0.00126801633939148	1.50090749110488
dram1	-0.85492799151482	8.74016531681937	-4.92420129993741	6.70918485410723e-05	0.00127543969063375	1.49151836526953
gpr171	-2.08348236982062	3.36837157080216	-4.92416685351582	6.70973908073745e-05	0.00127543969063375	1.49143673264477
ier5	1.20385785510771	9.12366781266784	4.923716610076	6.71698754066537e-05	0.00127543969063375	1.49036972185421
laptm5	-1.13532561509047	10.7127737018646	-4.92316672222686	6.72585090837308e-05	0.00127543969063375	1.48906655750857
myh11	2.21229727915633	5.89217866621994	4.91906347470899	6.79236332355988e-05	0.00128608310452052	1.4793420036146
mid1ip1	1.25851797484803	8.46667140334162	4.91510097659611	6.85722504978194e-05	0.0012963819510145	1.46995039153644
ctsc	-1.27414696136498	9.08177301758719	-4.91375952316198	6.87932467129689e-05	0.00129750483825201	1.46677084142156
phc2	0.921233925049666	9.22276099087175	4.91346897178202	6.88412080054569e-05	0.00129750483825201	1.46608215925986
pttg1ip	-0.560314499067779	10.3238058193807	-4.90978972311635	6.94514720139442e-05	0.00130653848126751	1.45736110225201
adirf	1.57529688019272	7.80538206888113	4.90930952030464	6.95315237951459e-05	0.00130653848126751	1.45622282149126
tk1	-1.71416582180615	5.21695705540048	-4.90851763696898	6.96637376757901e-05	0.00130703949036259	1.45434570864459
sun2	0.767790074492696	8.43837102598935	4.90493998965015	7.02642396200574e-05	0.00131580129733736	1.44586480681758
ckap2	-1.13943237336478	6.31121006193161	-4.90447156857576	7.03432495225174e-05	0.00131580129733736	1.44475436687284
tom1l1	1.33949485030778	5.82178695277001	4.90219359627164	7.07287630275885e-05	0.00132101700236897	1.43935408240908
fem1c	0.733507625146845	6.83470827031059	4.89931461675404	7.12190432949368e-05	0.00132817080289338	1.43252873728709
nlgn1	1.98870433735554	3.4313145255072	4.89115436048923	7.26274452037701e-05	0.00135218538385198	1.41318111466666
dusp1	1.6986209330735	9.82163914586441	4.89059423444848	7.27251446051378e-05	0.00135218538385198	1.4118529891704
scn9a	-2.10630378353779	2.98800896852649	-4.88550912576631	7.36182050917235e-05	0.00136499162784061	1.39979506676349
dlgap5	-1.81096453202091	4.09153987151132	-4.88541765585977	7.36343702977897e-05	0.00136499162784061	1.39957816268401
id4	1.23742705976406	7.04288772910704	4.88104307726287	7.4411677021557e-05	0.00137733900830783	1.38920430091464
egfr	0.825620752303305	5.54184812846016	4.88006096961111	7.45873210743913e-05	0.00137852954755849	1.38687523955156
foxc1	1.67300541902997	8.21691091114517	4.87696238999776	7.51442327445594e-05	0.0013852888565799	1.37952675468937
c7orf25	-1.13398866260364	4.70576401064879	-4.87616857244395	7.52875810929362e-05	0.0013852888565799	1.3776441094892
irf8	-1.0571887184772	8.28802820767796	-4.87616263767783	7.52886538381874e-05	0.0013852888565799	1.37763003430848
rhobtb1	-1.70738442720473	5.19047845890213	-4.87458057896628	7.55751718490809e-05	0.00138849755639046	1.37387790243462
kdm3a	0.783344060992694	7.94503067517671	4.87327293973362	7.58128222874161e-05	0.00139080026427418	1.37077653841697
eaf2	-1.97039920283256	5.95658656377701	-4.87221656570953	7.60053587558071e-05	0.00139226975957568	1.36827106326816
siglec1	-1.40358907047459	7.94277306015211	-4.86902495099891	7.65900725718712e-05	0.00139908778164303	1.3607010541511
ing1	1.3561660438575	6.03729359768529	4.86881823219529	7.66281003641798e-05	0.00139908778164303	1.36021073740196
cd72	-2.27218480895371	4.66624863365586	-4.86833801167168	7.67165148781085e-05	0.00139908778164303	1.35907169566309
mxi1	0.874066706829979	9.28969289958591	4.86701167633616	7.69612450792053e-05	0.00140014710127752	1.3559257010671
arhgef6	-0.866777895423641	7.56936864152769	-4.86679802408079	7.70007410134856e-05	0.00140014710127752	1.35541892397792
slpi	1.27747459793911	7.68861526052993	4.86411724561659	7.74980549734136e-05	0.00140525604442904	1.34906006032717
pde6d	-1.08310572447165	5.86120123000096	-4.86406020698283	7.7508671432208e-05	0.00140525604442904	1.34892476079942
hspd1	0.791689378976615	9.67327388014394	4.85509751889638	7.91952513757902e-05	0.0014319416533066	1.32766328530074
igll1	-1.82562846178116	3.73179150443412	-4.85501040260796	7.92118252858774e-05	0.0014319416533066	1.32745661299742
eif4a3	0.817906316312511	9.38798263516448	4.85243941829068	7.97025359744536e-05	0.00143871210345723	1.32135716664867
il15	-0.98556742829624	4.46720775787673	-4.84883361046822	8.03959332794375e-05	0.00144900048293153	1.3128023204277
mr1	-0.863983786182105	5.50283388895984	-4.84792469819278	8.05716761939996e-05	0.00144900048293153	1.31064584194228
ythdc1	1.12350717221396	7.1216503362774	4.84765683450607	8.06235429814928e-05	0.00144900048293153	1.310010305421
abcc3	-1.20671761535498	5.04359827002889	-4.8468848313328	8.07732155747387e-05	0.00144958656298839	1.30817862859276
has1	2.53879176990192	8.81244293753571	4.84521751580475	8.10974251787704e-05	0.00145329872067831	1.30422264208302
ly9	-1.47435359379221	3.78289693602577	-4.84384196216856	8.13658904049253e-05	0.00145600263133553	1.30095884211205
rgs2	1.56056925839313	9.60166703460816	4.8425152987775	8.16256636268544e-05	0.00145790470564497	1.29781098721484
abcc4	-1.12608429591155	5.55743655346821	-4.84209746384187	8.17076528884446e-05	0.00145790470564497	1.29681955316988
pnrc2	0.908935306433442	9.67099429672316	4.84056564252451	8.20089447383182e-05	0.00146092399468519	1.29318481702238
lpl	1.70996771632511	7.25924203480092	4.84003881820789	8.21128240572472e-05	0.00146092399468519	1.2919347405
klrc1	-2.26737284996316	1.6541917995698	-4.8377797875376	8.25597681135146e-05	0.00146676844842131	1.28657429353127
kif11	-1.75275214408398	4.08303724190741	-4.83528226768504	8.30567554352037e-05	0.00147348395781394	1.28064774885051
pgrmc2	0.789207900050823	7.2486662033581	4.8342200750753	8.3269037825325e-05	0.00147513661715451	1.27812713622488
evi2a	-1.37001400456484	8.08619828790812	-4.83339391906939	8.34345261285421e-05	0.00147595676721391	1.27616662067385
rev3l	1.15546697623817	8.54414796540525	4.83186615709191	8.37414289858631e-05	0.00147927263214257	1.27254109800052
gem	1.25478040182143	9.12239047975692	4.81719179929499	8.67479286203992e-05	0.00153019886055043	1.23771383725177
gtpbp4	0.883855163890632	6.26583522634668	4.81527041955934	8.71495664543696e-05	0.00153509684410307	1.23315326977776
ddx21	1.23895742520675	9.37966759278902	4.81175259766748	8.78897875572845e-05	0.00154593641949127	1.22480312331048
hps5	-0.938253291891333	6.51210297891836	-4.80997862522516	8.82654702436222e-05	0.00154862977168296	1.22059216279131
cks2	-0.997442236957605	6.33469687439136	-4.80984877745418	8.82930322868584e-05	0.00154862977168296	1.22028393355948
papss1	-0.763519914748677	8.77572037498129	-4.80898707422455	8.84761612605863e-05	0.00154964682445522	1.21823843275648
csf2rb	-1.40083077051876	8.39505958234409	-4.80664246692407	8.89763789784172e-05	0.00155620692216065	1.21267272436214
ttc28	0.651176357094164	7.35810851891186	4.80596720150786	8.91209741653385e-05	0.00155653740915287	1.2110697273215
tmod1	1.79222916939218	6.93485970006737	4.80530706406808	8.92625591524493e-05	0.0015568144647673	1.2095026297218
cd37	-2.48883606561855	6.93117352113872	-4.8013426746364	9.01176201420174e-05	0.00156842559193941	1.20009132305196
s100a9	-1.88755612453356	8.78373060800813	-4.80104746718679	9.0181621695943e-05	0.00156842559193941	1.19939049438791
slc3a2	1.33809388377345	7.49668678184041	4.79524516191903	9.14489227355765e-05	0.00158823563847776	1.18561521009345
gadd45g	0.825207491199868	6.48076192631985	4.79395254390518	9.17336860184231e-05	0.00159094990751559	1.18254627277242
jak2	-1.69352767488907	5.23217672163613	-4.78737268363071	9.3197152084725e-05	0.00161407039757364	1.16692365086992
olfm4	2.21058287881184	2.10390125557308	4.78597706762165	9.35105742024551e-05	0.00161723664853213	1.1636098786479
gtse1	-1.06541759214574	4.81924477928671	-4.78535021139092	9.36516969747307e-05	0.00161741835932788	1.16212144479891
kcnn4	-1.54711079761398	5.97327359434917	-4.78467560992902	9.38038085156021e-05	0.00161778908196198	1.16051963111836
ncapg	-1.35561916502179	3.37639218200309	-4.7834619086513	9.40781059489319e-05	0.00162026312373522	1.15763771686125
fastkd1	-0.966793207948633	6.39018186971036	-4.78264434952294	9.42633308149822e-05	0.0016211983687249	1.15569641411179
slc39a14	1.12720605697547	10.9152328969823	4.78112234577865	9.4609133798358e-05	0.00162488890960481	1.15208235393109
itk	-1.21532813832965	6.44489252930669	-4.77825554076734	9.52639573620907e-05	0.00163386922993735	1.14527484569331
apobec3b	-1.57248111064143	5.07167079921989	-4.7732242230223	9.64242602662524e-05	0.00164971222086496	1.1333269842209
enpp4	1.21322463295311	6.93687739492754	4.77309545480301	9.64541426073027e-05	0.00164971222086496	1.13302119017691
rbm7	0.856066832072318	8.14829040449527	4.76728096032528	9.78132482833666e-05	0.0016706502806799	1.11921271274811
arap1	-0.53475172488863	6.88562358033178	-4.76542267268199	9.82516720761495e-05	0.00167582707344209	1.11479940706076
tppp3	-2.15897676237239	6.52740836469175	-4.76440608351176	9.84923528107244e-05	0.00167762146472517	1.11238504204379
prkcq	-0.746482453343757	6.48133015095433	-4.76371182220475	9.86570629369626e-05	0.00167811869553353	1.11073618049676
marco	-1.42793936908432	9.9355816974062	-4.762240665812	9.90070060522558e-05	0.00168176098209202	1.10724216496666
chrdl1	1.59658411755357	6.73295111458338	4.76091979231409	9.93222676666134e-05	0.00168480498700777	1.10410502915887
igfbp6	1.68360902802277	9.34043399144551	4.75435002377487	0.000100905419310029	0.00170745744727633	1.08850091269811
pax5	-1.10892975955367	4.57498122521597	-4.75423466038996	0.000100933445159192	0.00170745744727633	1.08822689958056
ms4a1	-2.4552078522089	6.12567771725933	-4.75025065148634	0.000101906132164596	0.00172156021090614	1.07876382500788
coro7	-1.65788440748503	5.09727997718464	-4.74877752532123	0.000102268181026004	0.00172532273248639	1.07526466940936
fcgr2a	-1.5975466747028	8.5537136651941	-4.74547656491127	0.000103084170300044	0.00173672283105503	1.06742363387151
cd19	-1.86189946204507	5.55392026420611	-4.74416469458458	0.00010341028101486	0.00173984987745518	1.06430737599251
slco4a1	2.00306386473745	7.18254243385071	4.74307841230734	0.000103681100965882	0.00174203944811468	1.06172695833859
lair1	-1.55014552315176	6.95943728598765	-4.74151258454251	0.000104072734429218	0.00174625023094445	1.05800735518417
rgpd5	0.851413295698835	8.50088774303887	4.73726969315823	0.000105141446466596	0.00176179503598899	1.04792815600739
cks1b	0.772671731989968	7.55522435570404	4.73370121716191	0.000106048844490054	0.00177220672240337	1.039450766934
h1fx	1.68903649528166	9.07317500800956	4.7337004772303	0.000106049033457232	0.00177220672240337	1.03944900910032
fads3	1.25887058632022	7.04908635025543	4.7286812648146	0.000107338704012231	0.0017913412018645	1.02752475301911
klf11	0.891945226770895	7.93592451766612	4.72569643617431	0.000108113129057495	0.00180183698131758	1.02043338395476
orai2	-0.96372612796565	5.54176380976859	-4.7220200770192	0.000109074717488885	0.00181541965949579	1.01169882821155
me1	-0.892444809444621	6.14337379079677	-4.71968655633825	0.000109689539874077	0.00182320211041703	1.0061545453814
ptafr	-0.91532679498745	6.25758619171746	-4.71882451591602	0.000109917547525121	0.0018245428833828	1.00410637046666
st14	-1.14183448009837	3.63965347778943	-4.71662282047752	0.00011050206065764	0.00183178984889366	0.998875161665449
msx2	-1.15617446070006	4.03525785521075	-4.71108966942184	0.000111984883101774	0.00185388878001239	0.985728037749337
hist1h2bb	1.21380732806065	1.14165586129687	4.70814146728298	0.00011278313858253	0.00186461095469622	0.978722686720084
akap1	0.758401759976188	6.23632598946977	4.70663061288391	0.000113194436863257	0.00186891561557029	0.975132618581847
gprc5a	2.63750005595118	7.22499301976867	4.70588628323519	0.000113397620205554	0.00186977727164497	0.973363939183837
bmp5	1.6465306335133	4.47364457817607	4.70480549649665	0.00011369330218587	0.00187215978852078	0.970795751275769
capzb	-0.617430462244357	8.37453743512847	-4.70401884999588	0.0001139090014776	0.00187322067104531	0.968926492410014
anp32b	0.703762021726353	9.86568515597283	4.70189843166151	0.000114492477976416	0.00188031877292037	0.963887820438278
galnt6	-1.53075095003844	6.28931067376479	-4.70032048570799	0.00011492863525713	0.00188498184157488	0.960138154436524
ccna2	-1.01242240401797	4.9404420419131	-4.69730230389001	0.000115767553676007	0.001893863718167	0.95296594237155
trib2	-0.807202142679562	7.17198351648672	-4.69727184726848	0.000115776050605865	0.001893863718167	0.952893566430957
dnajc12	-1.27965894001689	5.09466663808093	-4.69549910193569	0.000116271703298198	0.00189946240361687	0.948680855709681
p2ry6	-1.12388056503988	6.73079993796061	-4.69407660729364	0.00011667097255504	0.00190347385131629	0.945300434315305
marcksl1	-1.05627539038879	7.85110596807954	-4.69245341822137	0.000117128260565191	0.00190842006655101	0.941443040773597
uqcr11	-0.619863101359334	9.34977598071431	-4.69175653960292	0.0001173251400875	0.00190911591288241	0.939786944875366
h2afj	1.54800560913719	5.27250934516067	4.69033974434309	0.00011772643606609	0.0019131318343916	0.93641997987356
pls1	1.7796265310762	5.02024160825576	4.68607332245109	0.000118943235350495	0.00193037232417454	0.926280779727108
plppr4	-1.21449355136031	6.08614244169621	-4.68457392344727	0.000119373870949267	0.00193482545021567	0.922717372233204
znf331	1.01507889571885	7.99188781426042	4.68250234278867	0.000119971424885892	0.00194161539195055	0.917794084572556
tigar	-0.833083515957232	6.45426325421915	-4.68203589912467	0.00012010638700106	0.00194161539195055	0.916685532372976
ccnb2	-0.984699645409958	5.56963374259131	-4.68140276073494	0.000120289825699239	0.00194204551712343	0.915180807364359
tmc6	-0.671526107316148	6.48698584238926	-4.68025983610796	0.000120621679047935	0.00194486751517003	0.912464502198985
man2a1	-0.794869057516282	8.02540777752495	-4.6789952545663	0.00012098993056041	0.00194826828365352	0.909459040896508
nbn	-0.710835775926275	6.46827646749802	-4.67765302470146	0.000121382032271856	0.00195204377353557	0.906269010830093
slc15a3	-1.12148560125946	7.83596176452869	-4.67688529891158	0.000121606880803264	0.0019531232230698	0.904444372139657
clcn6	0.620305377152937	6.79853241123492	4.67365428954785	0.000122557772466492	0.00196378744479502	0.896765201187867
cdk1	-1.34284288309892	4.74299768502303	-4.67355186054152	0.000122588039637127	0.00196378744479502	0.896521754702435
dok1	-0.573736332076908	6.42664274171764	-4.6700838347923	0.000123617274668934	0.00197771668246178	0.888279092034445
dnmt1	-0.649520173620819	7.46311923692493	-4.66875488123731	0.000124013981428721	0.00198150339617013	0.885120444233617
cnpy3	-1.13709040358305	5.91642766762915	-4.66745597204467	0.000124402958333558	0.00198515700134593	0.882033181959748
itgam	-0.656506770002709	7.38986139268424	-4.66380509728941	0.000125502856327449	0.00200013110669601	0.873355617514792
sectm1	-1.07533674072752	7.80261828111407	-4.66178749825894	0.000126114892953123	0.00200730169593641	0.868560020127056
plxdc1	-0.95427671303529	7.28607742785282	-4.65860379260578	0.000127086784750741	0.00202017414065266	0.860992615144834
npr2	1.15767359335866	5.2856941126999	4.65106792508675	0.000129417418136406	0.00205458447279887	0.843079972332114
tlr1	-1.07242056385326	6.0487130695553	-4.64830033503813	0.000130284117784622	0.00206307909837865	0.836501280197971
rora	0.882940257335321	5.93597435448486	4.64829529141057	0.000130285702570629	0.00206307909837865	0.836489291175349
atp5f1e	-0.618109639972952	10.543638263621	-4.64635332483556	0.000130897342918002	0.00207011723799951	0.831873091624665
fam49b	-1.04972814189566	6.50550254376029	-4.63621502053949	0.000134137740531721	0.00211865770536263	0.807772906167439
ddit3	0.838419812831376	7.95361587004985	4.628867509632	0.000136536493730721	0.00215379796416244	0.790306166336078
rala	-0.861203783898909	6.86707782247091	-4.62592823589708	0.000137508128701865	0.00216636534060457	0.783318685037367
sel1l	-0.907996672002537	6.65857290504076	-4.62486423001585	0.000137861569460443	0.00216917384323846	0.780789223944288
rmi1	-1.46758099203047	5.59774493468024	-4.61946411530513	0.000139669518071708	0.00219483203335275	0.767951377991752
phgdh	1.0659261667072	6.41136952377149	4.61848657403644	0.000139999338164499	0.00219722662166159	0.765627414821865
serping1	0.799185604536971	10.9624877502843	4.61703189900051	0.000140491593275881	0.00220216126523448	0.762169120485871
cebpb	0.859503260958164	11.7624884386449	4.61487022288578	0.000141226312599064	0.00221024983436873	0.757029994663608
chfr	-0.617568767737941	7.9547625459358	-4.61446461555248	0.000141364602182027	0.00221024983436873	0.756065707740767
sult1a1	-0.688039903192477	8.2082155997558	-4.6126470748897	0.000141985957531578	0.00221626444257681	0.751744688657377
fads1	1.02931180586959	8.34295822641999	4.61229323887195	0.000142107241169829	0.00221626444257681	0.75090347638349
cth	1.23089532351867	4.86725273451171	4.60723044290079	0.000143854063022232	0.00224068536151484	0.738867048254959
dtl	-1.57174166236533	4.43479687919476	-4.60392382448907	0.000145006593688609	0.00225234399775581	0.731005707018402
cxcl12	-0.802240452717978	10.2618039594596	-4.60381943979639	0.000145043128099085	0.00225234399775581	0.730757535766449
acbd3	0.914171263562444	7.63327418507131	4.60351929920286	0.000145148228232991	0.00225234399775581	0.73004396075387
gzmk	-1.44545472944626	6.77780736414577	-4.59865222343959	0.000146863263027569	0.00227610486366756	0.718472558237597
duox2	2.64370235272828	5.02204510492657	4.59711560955349	0.000147408949079158	0.00228170627055902	0.714819250880586
crlf1	2.11634673443628	7.93403403053386	4.59361861142805	0.000148658424958399	0.00229817387797735	0.706505069722047
nxf1	0.684837846621027	8.89789629403502	4.59040340402651	0.000149816613852984	0.00231319093434102	0.698860793309408
prg2	2.05656806687612	4.18640073248198	4.58816551606349	0.000150628102753544	0.00232282415491549	0.693540099795666
psmb10	-1.26589547958304	7.41049786213342	-4.5853726160494	0.000151647050037996	0.00233562863261257	0.68689980343496
ifi27	-1.62575074713669	9.88075667232378	-4.58396514394195	0.000152163168693788	0.00234066648190705	0.683553436282196
slc35g2	0.793787268894794	7.20221279507411	4.58201623344895	0.000152880749836678	0.00234878700400445	0.678919746187582
rlf	0.855077461539976	7.35605267406773	4.58037729289587	0.000153486834613176	0.00235517654648693	0.675023022454739
psme2	-1.30244225225626	9.36249158575437	-4.57828141647845	0.000154265417139325	0.00236419388667854	0.670039879001261
irf9	-0.594086021119505	8.67498081255563	-4.57429060426058	0.000155758932794687	0.00238413209492782	0.660551304578887
yes1	0.778540461649407	6.21408445369064	4.57052267105289	0.0001571823790288	0.00240294987594275	0.65159260255811
peli1	1.12528603695964	8.18964559292971	4.56298578256483	0.000160069022075722	0.00244406251586149	0.633672660464416
hmgb2	1.18482360782839	8.70087104844037	4.56232845445473	0.000160323292684064	0.00244493021343198	0.632109771007295
tbx3	2.37626999479767	3.77788220372268	4.56017200448796	0.000161160314637844	0.00245467180339535	0.626982504779056
xaf1	-1.23898503263448	6.22596564427438	-4.55569481549734	0.000162912180646398	0.00247830655152868	0.616337331433748
mdk	-1.43588747556466	5.40359160886208	-4.55255785973561	0.000164151022469825	0.0024940884800538	0.608878747401254
rnase4	1.44870096249347	8.35351980889598	4.55140552341801	0.000164608475474281	0.00249797396053679	0.606138892961821
xbp1	-0.899108148921499	9.79944580334771	-4.55001937858902	0.000165160443355238	0.00250328246030345	0.602843122592566
nup153	0.664629169549114	8.32552422216728	4.54731709788934	0.000166241854916533	0.00251659277436605	0.596418037707156
cdcp1	-1.43951254734571	4.93173551968847	-4.54667768676202	0.000166498776865766	0.00251740458355163	0.594897740128909
zfp36l2	1.33339458818587	9.33876936041182	4.54225441874195	0.0001682870527438	0.00254133972454449	0.584380748415798
cd300a	-1.14450155286629	4.26706068132718	-4.53744560448205	0.000170253105600736	0.00256789793745909	0.572947077303253
rb1cc1	0.765876123528702	7.04049325869546	4.5328004926246	0.000172174141804989	0.00259371337952699	0.561902660387776
slc2a6	-2.33185021276817	4.16621308529781	-4.5317504164798	0.000172611421563913	0.00259714123113722	0.559405959358011
zap70	-1.80187901252337	4.31603729448061	-4.5299636256898	0.000173358055170308	0.00260238455021704	0.555157622524568
ramp2	3.08381758733674	5.68144361077122	4.52991070261822	0.000173380219165715	0.00260238455021704	0.555031790863608
dnajc15	-0.789390659892026	8.18458211807209	-4.5282794777884	0.000174064768337008	0.00260949639989973	0.551153339333337
sars	0.57032666094976	9.23362156206935	4.52743040792971	0.000174422157297203	0.00261169235043684	0.549134566547094
yap1	1.6375222864699	5.64306708479208	4.52366681087099	0.000176015220709426	0.0026323628961894	0.540186152901716
cideb	-0.85152259527615	6.90298135589622	-4.51706122623606	0.000178846668920896	0.0026688029370284	0.524480669070968
nup62	-0.931021683480118	6.57808415089239	-4.51697747973071	0.000178882858574947	0.0026688029370284	0.524281553767283
gm2a	-0.921299538314009	5.94960854017799	-4.51623096445196	0.000179205777879077	0.00267040330622938	0.52250664365862
nqo1	0.624497540470396	5.24969513733368	4.51551455866437	0.000179516223314791	0.0026718141746479	0.520803323692053
mrs2	-0.743986353003065	5.6141680674335	-4.51398049375688	0.000180182809041896	0.00267447213190457	0.517155951550874
cndp2	-0.921072287834544	8.8849221826158	-4.51393292848777	0.000180203516911365	0.00267447213190457	0.517042861157058
adamts5	1.59144474544987	9.29063155940828	4.51361326530633	0.000180342746518639	0.00267447213190457	0.516282835527553
niban1	-0.855044889165478	8.22913415636211	-4.51214654805298	0.000180982963105043	0.00268075601929396	0.512795599540795
fnbp1	-0.861313169202913	7.4889919936895	-4.50545458294047	0.000183933070465022	0.00272119858012947	0.496885048279434
mknk2	1.19173361307077	9.47778339119276	4.5028864864916	0.000185077978880106	0.00273486946595747	0.490779302965576
impdh2	0.894978609219848	9.26100410746847	4.49872004015704	0.00018695070743837	0.00275747770533086	0.480873498498073
npl	-1.55270770874314	6.85845626563012	-4.49849295846585	0.000187053320881686	0.00275747770533086	0.480333610405718
irf4	-0.67585810066189	4.01274772572491	-4.49684224971229	0.000187800943224711	0.00276520699161903	0.47640904975721
vkorc1	-0.895926527872165	9.77971003302918	-4.49449671137603	0.000188868424379788	0.00277620690576052	0.470832560717287
xpnpep2	0.904987603092633	5.60306382392863	4.49421640903087	0.000188996400028758	0.00277620690576052	0.47016614763689
tnfsf15	-1.49170429283186	5.17733664234975	-4.49371327491895	0.000189226330836824	0.00277629106013317	0.468969957885853
tob1	1.42188474029884	8.82527933983155	4.49121504425294	0.000190372181218684	0.00278979730181179	0.463030497074207
slc31a1	-0.946617759960577	6.22249766801247	-4.49047118738449	0.000190714706241206	0.00279151324749982	0.461262010189619
aoc2	1.30083558903697	6.12178755442583	4.48948002485351	0.000191172070228362	0.00279490406804936	0.458905571020321
rassf4	-1.37771941108299	5.57401766004624	-4.48510542649889	0.000193203885343266	0.00282127796250668	0.448505268085893
tspan13	-1.26667137599937	7.70403818476047	-4.48267009510372	0.000194344372604404	0.00283458935919946	0.442715500086073
p2ry2	1.75314523250756	3.27677548783127	4.48051955705272	0.00019535710651054	0.00284600829402355	0.437602840256547
plekhb2	-1.04126601614261	7.83651565148303	-4.4793963595403	0.000195888148277552	0.00285039123398463	0.434932580851187
ell2	1.45398617271249	5.62935650001338	4.47298800448399	0.000198945821454059	0.0028905405858382	0.419697737899669
wfs1	0.58160251102326	7.32386358401533	4.47263799293632	0.000199114198475328	0.0028905405858382	0.418865651761013
diaph2	1.27403999685223	6.39189439308142	4.47209347957876	0.000199376427181929	0.00289095819413796	0.417571176665682
phf20	0.62506670879436	6.85281620418064	4.47041919107961	0.000200184910551694	0.00289928625422412	0.413590897202367
meis2	0.881853317666961	6.52695003874906	4.46761786089536	0.00020154498693143	0.00291552643674474	0.406931365737449
osr2	1.69454001906794	9.22606232017674	4.46662841408655	0.000202027587234973	0.00291552643674474	0.404579197147125
inhbb	1.671473187795	6.8608335236201	4.46618425423642	0.000202244602121988	0.00291552643674474	0.403523318540826
tnfaip8	-0.88201184456047	8.43031020295092	-4.46617726647932	0.000202248018183294	0.00291552643674474	0.403506706917279
fzd2	-1.66762454360271	5.57327673878652	-4.46563874144533	0.000202511457832086	0.0029159295143427	0.40222650145174
shtn1	-1.05500127552658	6.9356201512998	-4.46491988280956	0.000202863651139649	0.00291760812086211	0.400517603555419
rnf4	-0.599336226934472	7.96642855630749	-4.46367746623699	0.000203473803172947	0.00292298852052274	0.397564096385988
bcl2l13	0.709650147571834	7.84868360201551	4.46309051568884	0.000203762695385087	0.00292374676356145	0.396168786780536
atf4	0.649522854216862	10.6282654266476	4.46117000914855	0.000204710832749664	0.00293395166891098	0.391603348612338
baiap2	0.928603937936712	5.01477557234967	4.45935786064589	0.000205609534007525	0.00294342527123142	0.387295535739002
aox1	1.83308439409187	6.59814883099699	4.45797418886898	0.000206298404910721	0.00294987661432963	0.38400631547315
fpr3	-1.69020807044819	7.66191357790768	-4.45598100540713	0.000207294798492888	0.00295880313982918	0.379268220820587
def6	-1.79841268095415	4.72854626708373	-4.45577000640562	0.000207400559264453	0.00295880313982918	0.37876664730527
srd5a1	-0.96600165568332	4.2629960996378	-4.45510347036414	0.000207735008417225	0.00296016410728481	0.377182203196231
mapk6	0.721117269113867	8.66050559250809	4.4541735477999	0.000208202521925737	0.00296341589540966	0.374971663055602
hps3	2.62347402615478	3.27577621357182	4.45219715988547	0.000209199649344594	0.00297418973344903	0.370273579512336
cyfip1	-0.674729271542127	9.86030774402906	-4.44754618226156	0.000211565107057105	0.00300437009253225	0.359217896128026
sema4a	-1.23688193472476	7.36798427537236	-4.44502159107363	0.00021286031525543	0.00301851400473957	0.353216886113982
plekho1	-1.44788350164062	6.90633269442232	-4.44465580730984	0.000213048634429652	0.00301851400473957	0.352347416547059
gnly	-1.43122763189548	4.59522613089554	-4.44105272794673	0.000214912589881987	0.00304144297200988	0.343782973632114
fig4	-0.690929700521627	7.52026353162297	-4.43647738564049	0.000217303114460638	0.00307128579187712	0.332907730211629
nop53	0.591975740509891	11.5839594374633	4.43582401030613	0.000217646659546157	0.00307128579187712	0.331354729610823
itgax	-2.04672135119496	4.24168330738112	-4.43559842640952	0.000217765398148116	0.00307128579187712	0.330818543117156
asnsd1	0.690057339952575	7.83539300087027	4.43466476969705	0.000218257530161258	0.0030747246825789	0.328599358034682
syngr2	-1.30105478083472	8.82285572471555	-4.43228610668446	0.000219516374710392	0.00308894462277134	0.322945629414984
rab21	0.655399147306501	8.22189456194194	4.43053413346214	0.000220448215133378	0.00309853603631853	0.31878150106975
tspan1	1.65440494771288	4.71903218338798	4.42689801610273	0.00022239487610157	0.00312235345891807	0.310139240987113
apob	1.15981327156433	6.02292653344537	4.42405641892308	0.000223928169754783	0.00314031996157811	0.303385520475492
nipa2	-0.732730336282556	7.61592960079736	-4.4230172939221	0.000224491513239799	0.00314391970228935	0.300915827664907
ostf1	-0.588025823831881	7.33001267662703	-4.42264693907374	0.000224692638013896	0.00314391970228935	0.300035607764467
prmt5	0.915099246248457	7.28751583795774	4.41595231066115	0.000228359534741837	0.00318874993518657	0.284124903629171
crtam	-1.5729645355486	4.45330497419991	-4.41585798244709	0.000228411628241176	0.00318874993518657	0.283900724840546
atp9a	1.17646040445688	4.51515398844245	4.41410209468385	0.000229383509335385	0.0031954929529529	0.279727739434509
dok5	-0.88843991348683	6.8302132656727	-4.41405299873597	0.000229410743371972	0.0031954929529529	0.279611060346743
cfap20	0.863921838083195	7.77769449883359	4.40990852255255	0.000231721454650237	0.00322381947280577	0.269761642450005
cxadr	-1.87294194061629	5.43447669696137	-4.40947403747264	0.00023196504484131	0.00322381947280577	0.268729098262781
stk24	1.03208086774914	7.62484300862713	4.40554894590585	0.000234177280888143	0.0032509162211187	0.259401354040842
tnfsf10	-1.22385612540448	7.87802009226973	-4.40207559971006	0.000236152540670023	0.0032728657580835	0.251147383851841
pmaip1	2.33545287405588	5.56430451038367	4.4015151132807	0.00023647284551256	0.0032728657580835	0.24981547885631
ccnb1ip1	1.0465073514499	7.68983045645825	4.40107497116471	0.000236724681657069	0.0032728657580835	0.248769556613861
scnm1	-1.01064561127956	7.7885893055536	-4.40091616519762	0.000236815611664606	0.0032728657580835	0.248392182345781
pten	1.1459235999822	6.85767061102113	4.39857670130697	0.000238159219223827	0.00328776545334297	0.242832914586437
lpar1	0.862996048014626	8.51632072343949	4.39582554908833	0.000239749048925381	0.00330248535704143	0.23629548298249
nudt1	-1.67062750842508	3.8838518798291	-4.39580857626053	0.000239758890089659	0.00330248535704143	0.236255151707493
atg7	-0.654076484325306	7.02129432292168	-4.39444091591584	0.000240553217529609	0.00330974499185461	0.233005299721988
pde1c	0.794647488250495	5.41672837744085	4.39123510373525	0.000242425483711715	0.00332843009919664	0.225387749522312
fnbp1l	0.948574586598411	5.89147282392967	4.39119527352357	0.000242448837073033	0.00332843009919664	0.225293107486634
brd2	0.754589656900976	8.82024446553916	4.38947001822102	0.000243462560569046	0.00333718541964224	0.221193694766271
atp6v0e2	-1.08860840579912	6.48894158959841	-4.38919323919579	0.000243625585024355	0.00333718541964224	0.220536040230082
znf74	-1.56654706708046	3.90039540114517	-4.38594414878934	0.000245547518069911	0.00335979548757979	0.212815992689338
tgoln2	-0.535803393404789	8.40057357164247	-4.38179415461519	0.00024802447735299	0.0033899416148588	0.202955653174545
ang	1.27296654613694	6.78498558159507	4.37975567268244	0.000249250317340459	0.00340294010984223	0.198112374334088
fkbp5	4.04073698652636	5.43534558003968	4.37899799402708	0.000249707493035098	0.00340542718750398	0.196312209554087
ppcdc	-1.19738659876682	4.94654854483648	-4.37650212218285	0.000251219428239131	0.00342227742561624	0.190382367337265
tmem47	1.02095789828086	7.10105586878725	4.37559517584431	0.000251771102410447	0.00342602369356985	0.188227623004842
crebl2	-0.794049856309675	8.53089128136872	-4.36640385869777	0.000257430909420058	0.00349919533627725	0.166391702437518
pln	2.16878881387371	5.73597564780428	4.3656852996531	0.000257878717516437	0.00350143877083995	0.164684693647722
kdelr3	-0.767808908894878	7.12361592405421	-4.36106791644668	0.000260774961675395	0.00353688537834218	0.153715924783977
ptpro	-0.617473303556414	9.05505310243539	-4.35851785577882	0.000262388425656652	0.00355487513665899	0.147658374512354
pdxk	-0.705603581267177	7.37347627635607	-4.3572413755581	0.000263199826682851	0.00355544609959044	0.144626213757782
p2rx7	-1.41797961626082	5.82075259527163	-4.3571839426214	0.000263236393242232	0.00355544609959044	0.144489788050808
pla2g7	-1.12713124602325	4.65339202413377	-4.35709671639248	0.000263291938409467	0.00355544609959044	0.144282591764772
naip	-2.09987163280066	5.3775852991094	-4.35543090529023	0.000264354973263345	0.00356244961053532	0.140325676677091
sf3b2	1.00066375256212	7.8672536919053	4.35538246775485	0.000264385947838324	0.00356244961053532	0.140210620696547
cirbp	0.777127853681852	9.60992296012898	4.35430314081584	0.000265077093784131	0.00356788005687923	0.137646859009191
pla2g2d	-2.79557622579926	4.67244080951754	-4.35129720340961	0.000267011495599127	0.00359001449511834	0.130506905975312
per3	-1.54877252847891	7.12947439841192	-4.34837659159339	0.000268904528979458	0.00361154531708528	0.123569841645634
arsa	-0.951826854870468	6.29883101081821	-4.34742629244767	0.000269523371621327	0.00361593489792729	0.121312728809764
emp3	-0.97289935113511	10.5969350620004	-4.34608753506854	0.000270397602168447	0.00362373756239381	0.118133004507007
cry2	2.21583869319698	5.12342326038758	4.34505763773395	0.000271072074159551	0.00362884918304618	0.115686894629479
ccnh	0.623251332592915	8.39430166669859	4.34301579691085	0.000272414245503229	0.00364287861994221	0.110837398227136
c1rl	0.912062107698345	8.30314360392294	4.34180985222111	0.000273210077710105	0.00364939843823893	0.107973257148734
hira	-0.875775997812307	6.38888427505626	-4.34138467408421	0.000273491217853971	0.00364939843823893	0.10696346026068
alcam	-0.899301756973537	6.61649401528475	-4.34079135517784	0.000273884021812432	0.0036507059656656	0.105554337473193
klf5	0.832754573618369	5.22501056286291	4.3402599005151	0.000274236348458179	0.00365147172361035	0.104292149155404
insig2	-0.665910147132033	6.41310210984691	-4.33893787526255	0.000275114751947712	0.00365923305410152	0.101152412733965
bdh2	0.863288862854412	8.37949106369562	4.33844724705663	0.000275441460156692	0.00365964764068704	0.099987209882328
ppargc1a	1.79333767121387	4.55472959842565	4.334360236889	0.000278178131268593	0.00369204694480063	0.0902811383425552
rcbtb2	-0.935896875300568	7.54982382454883	-4.32961329052879	0.000281390887857392	0.00373068882691444	0.079008384405669
smad5	0.652054014170403	5.27278637339042	4.32583560259882	0.000283974169230392	0.00376091137709085	0.070037814419603
gphn	1.85076449765729	4.82711265740984	4.32523021696868	0.000284390349191027	0.00376239924576121	0.0686002916858008
uap1	1.18822317738943	10.7078739452817	4.32146307119029	0.000286993876898847	0.0037922304317087	0.059655225228207
coro2b	1.14214719656246	5.84001272148773	4.32108324051394	0.000287257703702073	0.0037922304317087	0.0587533421840583
dpt	-1.57829963784467	8.89375068321861	-4.32048602980628	0.000287673011636085	0.0037936686933862	0.0573353129988154
ptpn7	-1.17841441500093	6.19629523567462	-4.31973426422557	0.000288196653554073	0.00379653102229797	0.0555503204001715
tmem97	0.696733901637669	6.23937956365581	4.31699221365916	0.00029011472685486	0.00381737937956333	0.049039734809873
gramd2b	2.1596171774876	5.5738600743381	4.31659189930591	0.000290395814871086	0.00381737937956333	0.0480892673356159
znf544	-0.737042433802165	6.44047556954332	-4.31421927513455	0.000292067400482337	0.00383528167568694	0.0424560372926388
cbr1	-1.94892549483192	5.63941107196966	-4.31172458547283	0.000293835372027372	0.00385441039387177	0.0365331743484933
lrch4	-0.77332660991017	5.63153014142928	-4.31113514525146	0.000294254666685763	0.00385582596568233	0.0351337598351611
gca	-1.15060136345034	6.89214458148689	-4.31007683747654	0.000295008990629678	0.00386162402850666	0.0326212139800752
nfib	0.888009368240346	6.69901193032241	4.30120452828527	0.000301409451743584	0.00394123890278859	0.0115586841361468
lxn	-1.18094026139687	8.17904150199418	-4.30034119990804	0.000302039625022391	0.00394531295005514	0.00950930720375975
fos	2.05617897472245	10.9676474958434	4.29761271324579	0.000304039921874092	0.00396457110348413	0.00303255729036511
wipf1	-0.790754755064155	7.56334594991787	-4.29723016390442	0.000304321432305826	0.00396457110348413	0.00212449932092085
setbp1	0.815974285955919	7.11329493791665	4.29702237349054	0.0003044744504089	0.00396457110348413	0.00163126887800136
znf200	-0.787542045246679	6.01966639663964	-4.29549726246498	0.000305599909748589	0.00397504588489158	-0.00198883201643518
spcs1	-0.538729441881307	10.0537669109398	-4.29356653562672	0.000307030666012165	0.00398946562143614	-0.00657161951017216
st8sia4	-1.63006849796592	4.97869161196338	-4.28866931309516	0.000310689858644893	0.00403278041886762	-0.0181951504090367
il6st	0.659587505987969	7.59427913842199	4.28784189997627	0.000311312393740705	0.00403662970857711	-0.0201589317843105
wdr43	0.914879686899401	6.20774572168312	4.28025255500403	0.000317081050100898	0.0041071282880747	-0.0381703875718227
bak1	-0.810760702488748	6.02075670031554	-4.27961399469092	0.000317571268561484	0.00410917974775011	-0.039685763907424
tmem51	-1.98519399964599	5.72207308557979	-4.2789785028928	0.000318059883918391	0.00411120620309127	-0.0411938441882329
gtf2ird1	0.780965921958802	7.96220562239711	4.27324557777926	0.000322501928134745	0.00416427672168149	-0.0547979582162226
phka1	1.62709948097573	4.70450568521567	4.26860637004503	0.000326141903368737	0.00420689082230737	-0.0658058437474951
evi2b	-1.34797826085892	8.39608420725973	-4.26734704926093	0.000327137051070175	0.00421409783901192	-0.0687938181634848
aspn	-1.62468134791841	9.51900823403026	-4.26686430779906	0.000327519330343054	0.00421409783901192	-0.0699391973139241
ggt5	2.05103543237197	5.77604208315611	4.26660914601612	0.000327721571426026	0.00421409783901192	-0.0705446048513307
npy1r	2.44822377494867	2.62572181849742	4.26530375264392	0.00032875818068183	0.0042230420657501	-0.0736417984118889
tln2	1.20134385553748	6.29099019830135	4.26462915109323	0.000329295164189494	0.00422555649550104	-0.0752423423375213
fzd4	0.666372053835172	8.45882335240507	4.26305562824854	0.000330551100919735	0.00423728186613777	-0.0789755804702006
papss2	-0.714830988737891	7.76547744039917	-4.26175344687033	0.000331594082422985	0.004246255969642	-0.0820649817882808
nup43	-1.05706077580949	7.01164946278583	-4.26069225380663	0.000332446477294142	0.00425277347968323	-0.0845825958768742
smarcal1	-1.68003708522338	4.52498207535369	-4.25694027968699	0.000335477824186239	0.00428317747679996	-0.0934835792231778
hsp90ab1	0.821500360869493	10.3896420264001	4.25684487049129	0.000335555267732899	0.00428317747679996	-0.0937099159520152
mark1	0.800742787757843	6.46555593976816	4.25646857059	0.000335860884274631	0.00428317747679996	-0.0946025989401367
pde11a	-0.894749153556477	5.11023167653776	-4.25393424557496	0.00033792642776414	0.00430508534465365	-0.100614547688372
gpc5	1.80551739120949	3.63000001831091	4.24623710170222	0.000344277985503436	0.00438149465004013	-0.118872255421819
tdp1	-0.96740037830819	6.39201722129925	-4.24555621697543	0.000344845552826912	0.00438386422822326	-0.120487209218104
acap1	-1.23205004587073	3.36206494380013	-4.24516483474497	0.000345172221797438	0.00438386422822326	-0.121415499309314
tex2	1.26409433172763	7.0041764303417	4.24429458905091	0.000345899685231199	0.00438860225637084	-0.123479547800899
inpp5a	0.827321945233233	7.65909713910308	4.24225100229977	0.000347614008231896	0.00440583855059935	-0.12832640729533
ndufs3	-0.598727544660706	8.55522802628604	-4.23979203691733	0.000349688043760039	0.0044275941164423	-0.134158214866278
vamp8	-1.62625930019941	8.73585909521978	-4.23826595523002	0.000350981445294719	0.00443943129426405	-0.137777424755921
ddit4	1.74968136757454	10.615409197854	4.23550717872763	0.000353331739192903	0.00446459890451604	-0.144319815605436
mad2l1	-1.17436313366016	4.74830223144942	-4.23461521744213	0.000354094990341889	0.00446968222773049	-0.146435019502486
epor	0.62000185008889	5.4290503514124	4.23407758658164	0.000354555836603318	0.00447094187847138	-0.14770994562033
gata3	-1.1597995961377	3.57821881648746	-4.23229565997171	0.000356087557478465	0.00448568893617073	-0.15193548194296
csf2ra	-1.63704153953314	4.81235079890669	-4.2302478696813	0.000357855978716027	0.00450338474028512	-0.156791305499972
dynlt3	0.646638462954044	8.88786999970639	4.22883820099301	0.000359078430961544	0.00451418092446376	-0.160133880826159
slk	0.584543835872974	7.71166415363468	4.22738771678824	0.000360340633713912	0.00452545442928942	-0.163573149586632
lmo3	1.12809110826173	6.40252136438219	4.22433520386311	0.000363011412118793	0.00455437722012869	-0.170810725378916
dimt1	0.844525472370851	6.33973553587203	4.22153589715492	0.000365478030249494	0.00458068264026264	-0.177447593193937
tspan7	0.993102463709774	8.48835270343556	4.218049367834	0.00036857362441155	0.00461481010221256	-0.185713321228721
cdc37l1	0.71373428940308	6.89589803652303	4.21701717092114	0.000369495099032269	0.00462167455688544	-0.188160311835638
usp9x	-0.619850881294052	8.22929259638245	-4.21584962016196	0.000370540182408512	0.00463006970611968	-0.190928124405175
ccr6	-1.83243897021908	3.85231124528154	-4.21409394625662	0.000372117260207121	0.00464481608507756	-0.195090037064285
sik1	1.56344981137351	8.65763193923148	4.21370170742181	0.000372470513807803	0.00464481608507756	-0.196019840178034
rbms1	0.52616481044458	9.62554900464606	4.21229501590103	0.000373740149079203	0.00465596002620501	-0.199354349678897
stac	0.854254489963727	6.92248304760677	4.20991426931588	0.000375898792441765	0.00467814547417726	-0.204997619090673
tia1	-0.646916189515728	6.60433152813372	-4.20824001569635	0.000377424306437647	0.00469241484600139	-0.208966080779329
rnd1	1.41984453253813	5.34191571302544	4.20008660007715	0.000384942214772211	0.00477778232631397	-0.228290194615593
net1	0.976724920241475	8.07633430709373	4.199957631995	0.000385062324288245	0.00477778232631397	-0.228595832631493
znf107	-1.70897630532774	4.13286378707329	-4.19900477174275	0.000385950894893018	0.00478401394540565	-0.230853966791278
gja4	1.18153258054657	6.91190359499671	4.19858120669819	0.000386346539041057	0.0047841291929454	-0.231857738101548
odr4	0.628794439477574	6.91408968776945	4.19555628720623	0.000389183858149274	0.00481444926619627	-0.239025997770018
oxld1	-0.812606459053855	4.56103994519713	-4.19215841847185	0.00039239581628435	0.00484324169065506	-0.247077535261123
cp	1.90621384392113	7.92363677362589	4.19201839811505	0.000392528741911693	0.00484324169065506	-0.247409313613193
bmp1	-0.796437586550862	6.4023342186287	-4.19185417484352	0.000392684701398504	0.00484324169065506	-0.247798439604024
bag1	0.549415423938068	7.82015691626171	4.19089752165763	0.000393594446118647	0.00484963186695244	-0.250065197679118
bbs1	0.666691553831464	7.83190507746097	4.18922202112221	0.000395192863384122	0.004864486309429	-0.254035135476776
trem2	-1.89693680179605	6.40199855684842	-4.18462781127802	0.000399609037180594	0.00491396098054349	-0.264919982161526
card8	-0.851181311504032	6.74995745036855	-4.18247033249028	0.000401699875433668	0.00493477138640388	-0.270031242405618
tpx2	-1.41329567728961	5.200327687747	-4.17856912498684	0.000405508347006813	0.00497662027847906	-0.279272972229903
olr1	-1.30583152026251	6.0324067118129	-4.17392662739377	0.00041008747943904	0.00502783490880557	-0.290269791005189
cfp	-2.00230319086777	3.05107155911638	-4.17338475094286	0.000410625312309733	0.00502944930003108	-0.291553279190084
tenm1	1.3566399433817	4.22137183972442	4.17249046765639	0.000411514462379089	0.00503346506743778	-0.293671445630988
fuca1	-0.859149820236169	9.38344809416189	-4.17223768709241	0.000411766140136839	0.00503346506743778	-0.294270165049586
ehbp1	1.00128366726289	6.41254015328855	4.17110674937032	0.000412894026373454	0.00504227488025885	-0.296948790209459
cemip	-1.94087068157063	7.69521383451092	-4.17066703140154	0.000413333389902191	0.00504266735680673	-0.297990244408709
tnfsf11	-1.59066339047634	4.07990172389443	-4.16909932173817	0.000414903636565564	0.00505684225550332	-0.301703221327523
lsm12	-0.981334800853175	6.00522359708512	-4.16763803570986	0.000416372647659291	0.00506740357769033	-0.305164030810406
dmxl2	-0.825364796324334	7.15875904035678	-4.16742363617443	0.00041658861682054	0.00506740357769033	-0.305671790763003
epb41l3	-0.934101655267027	8.14232792818215	-4.16479019116663	0.000419250478410399	0.0050947778941668	-0.311908355739344
nid1	1.16557283144708	7.37663098634972	4.16315375294851	0.000420913118274239	0.00510996778783324	-0.31578361373162
was	-0.88561188129037	6.89422802522173	-4.16153866108619	0.000422560521109104	0.00511664793165975	-0.319608185120016
st8sia1	-2.00046197819734	2.79987995761188	-4.16129131857881	0.000422813379329518	0.00511664793165975	-0.320193885376055
dio3	1.62382814835971	4.79732063963823	4.16118314266953	0.000422924015000222	0.00511664793165975	-0.320450041951966
cstb	-0.762644390674279	10.4499078645834	-4.16071928871836	0.000423398743893375	0.00511664793165975	-0.321548424131132
csf1	0.819131447814867	6.06655821987577	4.16059175062685	0.000423529365254885	0.00511664793165975	-0.321850425769994
ptx3	2.7684766901316	6.64292570206951	4.15870367708519	0.000425467793800643	0.00513505622868748	-0.326321157570157
cxcl11	-2.19258183453066	4.23203301963759	-4.15783780010434	0.000426359721971979	0.00514081055226779	-0.328371387877462
hs3st3a1	-1.95682112440006	2.74663606535246	-4.15735725213018	0.000426855532679137	0.00514178216066708	-0.329509216107174
abcg1	-0.941407896625745	6.89486124577945	-4.15414836961559	0.000430181111063189	0.00517680534333865	-0.337106806533876
ciita	-0.862221375193301	4.82502920625016	-4.15276631755915	0.000431621375730682	0.00518909465599324	-0.340378887856108
ppme1	0.562107841918618	7.45310001462156	4.14878187469549	0.000435800627524526	0.00523425719751329	-0.349811694286601
fbxw4	0.596310859116715	7.57715220306968	4.14786486655422	0.000436768170613322	0.00524079482238834	-0.351982506630516
prpf3	0.73730298572319	6.2665093147182	4.14726711792755	0.000437400013603794	0.00524329561321954	-0.353397518723959
plscr4	0.850205908602971	8.76184324479186	4.14553738867901	0.000439233544428732	0.0052601827665967	-0.357492086776682
noc4l	1.06360901540091	5.34864207634132	4.14357789341447	0.000441319893053449	0.00528006206345977	-0.362130353524477
rnf130	-0.57392398734812	7.46661812911036	-4.14160860494518	0.000443426627857122	0.00530014665323816	-0.366791589357569
zc3h12a	2.05875644272937	6.956210169824	4.14058063980203	0.000444530321372627	0.00530821501403783	-0.369224661457065
paox	-0.683429548227103	5.52858464714246	-4.13930633145766	0.000445902309966255	0.00531523570688768	-0.372240717691794
wasl	1.18117824239517	4.07801255431053	4.13923731781447	0.000445976734188509	0.00531523570688768	-0.372404057872089
dcp2	-0.882945183395448	7.2375008946566	-4.13851866462839	0.000446752465429879	0.00531936132636365	-0.374104936869665
mrc2	-0.558372295750664	8.1655784280948	-4.13633917413775	0.000449113297771612	0.00534233426158105	-0.379263090045137
tlr8	-2.63824850688331	3.20720732764918	-4.1358259282113	0.000449671055225343	0.00534383558239483	-0.38047773951893
tra2b	0.841944967122865	8.12910467948669	4.13307520155663	0.000452672133485828	0.00537434230964047	-0.386987366130493
lrrc17	-1.08688783667524	6.63231195721694	-4.13137972617646	0.000454531860138596	0.0053912528966439	-0.390999515781482
naca	0.621228233806189	10.1029832889215	4.13084046868604	0.000455124954365451	0.00539312182766257	-0.392275573167586
zfyve9	0.599276212495203	6.14249833941172	4.12969471858263	0.000456387653264859	0.00540291425466419	-0.394986733106995
mmp9	-1.64732160355656	7.48336672563677	-4.12828104612874	0.000457950436893397	0.00541623711561694	-0.398331767953768
mrpl48	-0.685180445307682	6.87496702276784	-4.12648970397615	0.000459938392929831	0.00543455832027681	-0.402570281461137
zfyve26	-0.737055890228781	6.74527571909892	-4.12480570293339	0.000461815072147069	0.00545153101849109	-0.406554645919447
c1qb	-0.958485327630873	10.7556058855129	-4.12257443310944	0.000464313401638494	0.00547333092307994	-0.411833601925809
sparc	-0.779480434606054	10.5142161318154	-4.12228240593543	0.000464641377067332	0.00547333092307994	-0.41252448697164
basp1	-0.88002594805393	10.2839785739932	-4.12197416168888	0.000464987816448365	0.00547333092307994	-0.413253733389267
rgl1	-0.744181384172453	9.26093021641462	-4.11749141395199	0.000470055232373387	0.00552464254105991	-0.423858422874047
ahr	-0.990770218517856	8.01327799256126	-4.11732949282796	0.000470239298899875	0.00552464254105991	-0.424241452328024
pmp22	0.743697606123673	11.6589057132359	4.11680467453648	0.000470836388819463	0.00552641422061745	-0.425482915703423
spsb1	1.18134476136234	7.09749812363973	4.11612304733438	0.000471613009876138	0.00553028778531839	-0.427095288018015
otulinl	-0.960989735531911	5.77894996643138	-4.1150894858321	0.000472793048828634	0.00553888015482023	-0.42954009986297
sema3g	1.02528237836171	7.19137355029728	4.1139437529876	0.000474104596228389	0.00554580748114233	-0.432250170623433
gins1	-0.752736504020845	4.96468071604699	-4.11379070235529	0.00047428007126946	0.00554580748114233	-0.432612184584509
brwd1	-1.10826083612516	3.72279008145762	-4.11221076049847	0.000476095288245267	0.00556178108900108	-0.436349173677788
ppt1	-0.756042795136652	10.075628893644	-4.10939603498301	0.000479346340055212	0.00558614785494974	-0.443006390093637
znf185	-0.750497479870606	6.96153960535272	-4.10929140337117	0.000479467616826027	0.00558614785494974	-0.443253849215973
mrps11	-0.978290783383762	4.79366510511583	-4.10895548954582	0.000479857175723908	0.00558614785494974	-0.444048298172433
pkia	-1.64742357191483	4.96848344113264	-4.10884483533801	0.000479985570351815	0.00558614785494974	-0.444309998090609
fbxo21	0.64694923879634	6.2039601512706	4.10804925513644	0.000480909709059097	0.00559164781904113	-0.44619154308845
amph	1.01474551857558	6.29690368959609	4.10601924094859	0.000483275798468994	0.00561388762893204	-0.450992347914855
camlg	0.67742670938663	8.63872580081346	4.10403067949383	0.000485604821239618	0.00563565557770402	-0.455694878425851
nedd9	0.996867762892983	6.9982126835639	4.10169247072801	0.000488357667342776	0.0056622968115221	-0.461223943084577
lypla1	-0.782944939054711	7.72057333237604	-4.09469497274399	0.000496689295941008	0.00575351127374884	-0.47776862401421
plxna1	-0.734494562408652	4.75846717410508	-4.0941040669322	0.000497399314492385	0.00575635113211141	-0.479165605388823
lyve1	1.56412594072375	8.535878926322	4.09107824151932	0.000501050954017323	0.005793196978148	-0.486318723835121
fmnl1	-1.61310766160444	6.24416781613687	-4.08858653340115	0.000504078052636419	0.0058189425413898	-0.492208744462044
il2ra	-1.03599611356629	4.59539573420818	-4.08847210606438	0.00050421750358647	0.0058189425413898	-0.492479223927
yme1l1	-0.586618823663128	5.88410751245611	-4.08800594244835	0.000504786007823268	0.00582007926897163	-0.493581117121919
neurog3	1.89958910208669	3.26831824892544	4.08744931195611	0.000505465676419351	0.0058224943917217	-0.494896833126756
fam214b	-0.723607990235173	7.26201559313197	-4.08128793518932	0.000513050139527196	0.00590208230098011	-0.509459252400597
wsb2	-0.911442246100068	8.16706086639678	-4.08106380569104	0.000513328162654896	0.00590208230098011	-0.509988936718997
myd88	-0.543116483047003	9.40201034182208	-4.07684902869225	0.00051858444992283	0.00595698631112653	-0.519949095993593
mtss1	0.883269797614207	6.52578087054408	4.07494647289649	0.000520974672975668	0.00597889654815357	-0.524444745973925
vrk2	-0.598593644896498	7.33720653492672	-4.07412815721745	0.000522006112824465	0.00598518675472718	-0.526378314608428
cblb	1.2566594310568	5.60995680251284	4.07264433545858	0.00052388157496031	0.00600113371205691	-0.529884271391246
metap2	0.764744045652037	5.70937080322327	4.0699179680907	0.000527345050438143	0.00603522528611416	-0.536325721962115
rasgrp3	-1.70577903151965	4.24356411929702	-4.06747772664619	0.000530464376222912	0.0060653189019098	-0.542090739278491
oas2	-1.27794755768071	5.71052094992611	-4.06515265094015	0.000533453579090598	0.00609387054416871	-0.547583310521355
ndufa9	-0.543034637204005	8.27112538338845	-4.06346719810817	0.000535630940052393	0.0061131040835657	-0.551564661697808
dysf	-0.960175982161553	7.24304425727489	-4.06107136341337	0.000538741249632191	0.00614048332750288	-0.557223736706619
jmjd4	-1.2411388414972	5.15263159488354	-4.06085603383761	0.000539021673019109	0.00614048332750288	-0.557732336353225
ppp1ca	-0.992913141564983	7.93068672136574	-4.06021869020761	0.000539852536655744	0.00614298892807398	-0.559237697507359
cd53	-1.11153486802294	10.1330656101303	-4.05992656791675	0.000540233783628569	0.00614298892807398	-0.559927660750956
dhrs1	-0.724946377499224	7.24825204941417	-4.05831949517933	0.000542335963075687	0.00615703177595815	-0.563723299925497
mmp3	-2.51920332811553	10.770104352814	-4.05822243283401	0.000542463188853294	0.00615703177595815	-0.563952539450009
prdm1	-1.50917832899558	5.49510543049389	-4.05613518950078	0.00054520627247069	0.0061824993333375	-0.568881985125289
cybc1	-0.667323169597362	7.26206357307665	-4.05356953233439	0.000548597020904824	0.00621525792302327	-0.574940892306068
egfl6	-0.975481271972145	5.87611833754109	-4.04080982900061	0.000565774465051985	0.00640170821635667	-0.605066674348664
six3	1.71816255108617	6.38515547471045	4.04058036526238	0.000566088225543935	0.00640170821635667	-0.605608335646004
lilra6	-1.2344310420369	7.03704991813961	-4.03980986283788	0.000567143050472636	0.00640778503102432	-0.607427120019954
creld2	-0.672146098298345	9.16640232365708	-4.03439796979981	0.00057460730506683	0.00648620078271883	-0.620200793129393
isg15	-1.12446262187322	7.55547548539998	-4.03336601948767	0.000576041661755993	0.00649646985202592	-0.622636263308681
ror2	-1.32254361254868	4.53816886993333	-4.03225256302081	0.000577593303932567	0.00650674281601354	-0.62526400710022
ndnf	1.43785971508031	7.25949582946081	4.03195871829715	0.000578003480385601	0.00650674281601354	-0.625957462136961
cdh11	-0.926114646589293	7.39735816917818	-4.02679750375997	0.000585255431294016	0.0065823960088227	-0.638136580007313
c11orf80	-1.62863070326925	2.28138287775243	-4.02590806555262	0.000586514281361775	0.00659056837214416	-0.640235225271658
per2	1.17710990501631	6.36504944171694	4.02550385460911	0.000587087263870553	0.00659102591886587	-0.641188948992549
zbtb10	0.961191110413225	5.12357580921931	4.02404046829807	0.000589166324396296	0.00660837553894867	-0.644641665060101
tp53i3	-0.931871256258651	7.25525680024382	-4.0218815717351	0.000592246890337345	0.0066369169620338	-0.649735080770177
snta1	0.738751613246528	6.96163566138794	4.01448951294439	0.000602916604161877	0.00675037640988836	-0.667172304172759
hspa9	0.584586524794129	8.03867591804069	4.01378841395717	0.000603938445218083	0.00675510772445379	-0.668825923130875
ttc9	-1.57389745804502	3.48168718546444	-4.01333061401666	0.000604606611047972	0.00675510772445379	-0.66990567457036
plgrkt	-1.50800365275598	6.1084216876298	-4.01307792441231	0.000604975730147723	0.00675510772445379	-0.670501652941727
gimap4	-1.05765652736908	7.7547904890394	-4.01254887455939	0.000605749271530336	0.0067573479377305	-0.671749422211356
aste1	-1.51227539055442	5.13832299088533	-4.0121946458531	0.000606267750853475	0.0067573479377305	-0.672584862265614
dapp1	-1.1044474243158	6.82715711540874	-4.00876053542416	0.000611317144114795	0.00680750017587545	-0.680683637523187
s100a11	-0.868930466897307	10.3913741167114	-4.00572225879714	0.000615819375017313	0.00684554670179023	-0.687848155686734
hla-dqb2	-1.88211578444021	6.18104378615232	-4.00570880893665	0.000615839378647688	0.00684554670179023	-0.687879870045847
pitx1	2.00105484972818	3.31913068712928	4.00486189105347	0.000617100279976758	0.00685341055332035	-0.689876848506417
stard7	-0.809410004261574	9.31198001903842	-4.00330989529918	0.000619417575931422	0.00687298193795591	-0.693536212543332
blvra	-0.717673688876731	6.35107226744992	-3.99769600702348	0.000627872200294741	0.00696055636190669	-0.706771330128167
cnot8	0.907395186801585	7.53184814526654	3.99388013853101	0.000633684373127116	0.00701870625441241	-0.715766093172894
tcf7l1	0.767454786404768	7.59725996602247	3.99153425638207	0.000637284040873031	0.00705226834506769	-0.721295237141375
nsd2	-0.644635061217051	4.03481099672395	-3.9909560101839	0.000638174456268015	0.00705581633211325	-0.7226580719477
slc37a4	-0.741624268189943	5.56386655380159	-3.98943871872257	0.000640516749809082	0.007075395997222	-0.726233961927973
cep72	1.22690356496885	4.29513303432681	3.98568494087018	0.000646348370494598	0.00713345086616275	-0.73507992386866
grn	-0.87172718923715	9.91327928825637	-3.98321845657671	0.000650208836807223	0.00716823760605457	-0.740891701769644
ppic	-0.669333449568787	8.81246865354379	-3.98293237398029	0.00065065808521403	0.00716823760605457	-0.741565766670537
arsb	-0.606671643416416	5.98025832432994	-3.98152339965313	0.000652875166449488	0.00718394757361719	-0.744885481419924
iqsec1	-0.658833076525429	7.53213796055345	-3.9812892329495	0.000653244364684887	0.00718394757361719	-0.745437191110808
jpt1	-0.831644404736611	7.974250184694	-3.98023700714864	0.000654905916062178	0.0071958295994658	-0.747916238525907
sybu	0.865695266397631	7.49618799013977	3.97811588423638	0.000658268122249367	0.00722636006898396	-0.752913338343313
zfand5	1.47829457352962	8.26322251643738	3.97764577466292	0.000659015615260422	0.00722815798385279	-0.754020808124958
abhd3	-1.40381128313368	6.76977105345907	-3.97702483574656	0.000660004226009268	0.00723259498289626	-0.755483569494015
cd84	-0.70839202680484	5.45704457196257	-3.97422306695635	0.000664483344148733	0.00727493029111742	-0.762083375105536
cited2	1.07056140117776	7.95649097521479	3.97387463281469	0.000665042484821523	0.00727493029111742	-0.762904096566457
rai2	0.903535911762568	6.22542985725419	3.97016902850777	0.000671017959777246	0.00732236893478787	-0.771631868744254
slc6a3	2.24855551862839	6.06504789619818	3.96988571180282	0.000671477011588191	0.00732236893478787	-0.772299115107131
fam53c	0.53733148170181	8.02397588424015	3.96983714737336	0.000671555730784371	0.00732236893478787	-0.772413489761256
tmem260	-0.711505250317075	7.46088038521639	-3.96972076402933	0.000671744416532263	0.00732236893478787	-0.772687584738037
ackr3	1.11092726392745	10.5380711927814	3.96750899880523	0.000675340255746984	0.00735509092956456	-0.777896310429373
hfe	-0.477816947448518	6.3120641060877	-3.96640619757863	0.000677140304206162	0.00736821475130484	-0.780493264826265
cryab	1.24599813884406	9.16215768287357	3.96293107615048	0.000682843809738357	0.00742375320104484	-0.788676063238398
kansl1l	1.46145149515158	5.0673047683809	3.96103159686904	0.000685981455885847	0.00745092690194237	-0.793148301172049
sash3	-0.615753304361158	7.37762460067192	-3.96069033437833	0.00068654668457694	0.00745092690194237	-0.793951756093196
nat1	-0.621077020580623	6.43552581599139	-3.95962376266529	0.000688316217886073	0.00745729121683292	-0.796462787099436
ubn1	-0.605591783317376	6.93008773125146	-3.95961092254254	0.000688337548319473	0.00745729121683292	-0.796493016030476
mx1	-0.916392204047723	7.21707171646521	-3.95791571315661	0.000691159459425665	0.00747541724826104	-0.800483849865387
birc3	-1.3948921202627	6.00788572072147	-3.95788060650186	0.000691218020613655	0.00747541724826104	-0.800566494799718
cldn7	-1.41017525824749	4.44699338230686	-3.95668151701509	0.000693221175974818	0.00749053911177676	-0.803389220860742
armcx1	1.13209822897564	7.91698427255186	3.95603159245653	0.000694309324951741	0.00749249557603767	-0.804919129881236
paqr4	-0.925296062984172	6.1603052341145	-3.95585077395187	0.000694612365443854	0.00749249557603767	-0.805344766530856
gramd4	-0.476919258245938	7.21015745639919	-3.95486887351676	0.000696260264268472	0.00750373442335638	-0.807656056666455
rab29	-0.546217735271421	7.23970554641679	-3.95411514056686	0.00069752786926045	0.00751085878700188	-0.809430208845602
pik3cg	-1.22218783794638	3.30021563792808	-3.95242607020682	0.000700376825825811	0.00753498369609124	-0.81340580131512
gucy1b1	-0.758321546101445	6.6551866838712	-3.95128601236184	0.000702306292241387	0.00754918300071623	-0.816089035992099
derl2	-0.739789593286655	7.2845756669347	-3.94990921353452	0.000704643464385261	0.00756773635688004	-0.81932931435288
pla2g4c	-0.821730110867586	7.1207479181362	-3.94737269137699	0.000708969556550883	0.00760759966964435	-0.825298559136574
grk3	-0.559998592931633	5.87421099475737	-3.94613847596709	0.000711084066091428	0.00762368310858022	-0.828202860089487
aurka	-0.894833872251365	4.31327062293211	-3.94506229198242	0.000712932940022913	0.00763689324939769	-0.830735180702259
sod2	1.45670319359898	8.08842851111851	3.94328821436536	0.000715991215059032	0.00766302438727398	-0.834909463925248
fat1	-0.725772097946852	8.22339699893698	-3.94109566711915	0.000719788880313906	0.00769124796457099	-0.840067998223525
sgsm3	-0.585656718336121	6.22084582844833	-3.94104867142075	0.000719870499147039	0.00769124796457099	-0.840178563152637
spry1	1.13241134279482	8.24885189283927	3.93380864606244	0.000732554847310158	0.00782002299503593	-0.857209564364426
serpina5	1.94897454216945	5.11495280345266	3.93282801186261	0.000734289870394552	0.00782736908514262	-0.859515992804603
mllt11	-0.808955241669561	6.89962689697041	-3.93242751525053	0.000734999636432632	0.00782736908514262	-0.860457926757022
cemip2	-0.861186877285372	7.67089565885365	-3.93234873970847	0.000735139323751988	0.00782736908514262	-0.860643198447748
uba7	-0.930318144238136	6.85887549575077	-3.93142280291812	0.000736783201327011	0.00783813263061201	-0.862820861771089
me2	-1.57399510056126	7.60633963598559	-3.93013075062176	0.000739083168539502	0.00785585139572931	-0.865859445505412
bcl11a	-1.14875253195918	5.11734106286958	-3.92899626457836	0.000741108529307152	0.0078706234291685	-0.868527349708625
arhgap6	0.897021123205446	4.86928846766722	3.92769380191941	0.000743440567340527	0.0078790149132707	-0.871590132350724
gpd1	1.3192188309046	3.74462035876165	3.92761085180115	0.000743589334643586	0.0078790149132707	-0.87178518704897
bclaf1	1.08593168195812	6.70151213137059	3.92744423903501	0.000743888236428057	0.0078790149132707	-0.872176970068254
ifit1	-1.8171268389647	7.11081133451206	-3.92713474094135	0.000744443789754237	0.0078790149132707	-0.872904735391562
prrg1	0.59986214017084	6.80381883635395	3.92639113502325	0.000745780256527424	0.00788641922850478	-0.874653242751256
smad7	1.0616711253315	7.81001699372734	3.92541483163187	0.00074753856197117	0.00789826792908617	-0.876948836910319
arid3b	-0.72724790099407	3.53444231775976	-3.9228330604794	0.000752208138874006	0.00794082982410641	-0.883018972080388
uqcrq	-0.581333186593534	9.66627013370403	-3.92242814651978	0.000752943116996346	0.00794181824341205	-0.883970931371742
hmgxb4	0.562456361682889	7.14549198632981	3.92064727263549	0.000756184133825715	0.0079692154290756	-0.888157617920467
rplp0	0.392050852114563	12.2420474785583	3.91819378686472	0.000760671926499701	0.0080096942736784	-0.893925085728665
c12orf29	0.888636089510874	6.18025451861554	3.91585008999081	0.000764983578982538	0.00803495314248309	-0.899433955682512
dnttip2	0.699489068304121	8.60153215717165	3.91583217317741	0.000765016633419925	0.00803495314248309	-0.899476067290293
lipe	1.30914825997947	4.29734395652802	3.91583178871335	0.000765017342726929	0.00803495314248309	-0.89947697093277
scaf4	1.02117787221304	5.61710381639688	3.91527069903391	0.000766053206371733	0.00803901428347557	-0.900795738951513
camta1	-1.69685508691105	3.24987024837233	-3.9148187223407	0.000766888641571827	0.00804096701827598	-0.901858030077498
s100a10	-0.703179774834325	11.78559843839	-3.91368062705498	0.000768996307170342	0.00805624473070249	-0.904532837996422
mpdz	0.668674864582377	7.15966483703072	3.91173455970877	0.000772613600529369	0.00808729857595535	-0.909106304731269
tyms	-0.824156388548542	4.84973577595507	-3.91118421676655	0.000773639620863522	0.00809119883881164	-0.910399606016274
dyrk3	1.55678426680621	5.88404688169735	3.91046944047594	0.000774974217466898	0.00809831707585873	-0.912079282352097
phtf1	-0.493793088215842	5.83732696924159	-3.9100136642639	0.00077582641376212	0.00810038657809134	-0.913150301109499
pcolce2	1.11083568429493	9.32615945275085	3.91987134548136	0.000814848157695971	0.00839456300894276	-0.921161006099905
prdx6	0.798028503010228	9.36884429765851	3.90496672324649	0.0007853254036185	0.00819265751727707	-0.925008705415535
slc6a8	1.35060550509612	5.9602257394941	3.90152937847924	0.000791860887981365	0.00824930347616223	-0.933083800051128
spint2	-1.32590351375653	6.59549616483619	-3.90141059895093	0.000792087687406677	0.00824930347616223	-0.933362819931834
cldn5	1.8440658961151	6.55037230885239	3.89871725618508	0.000797247727600968	0.00829606605956537	-0.939689277353033
theg	1.2393259008496	4.79090707631192	3.89728933552664	0.00079999691954266	0.00831768417690744	-0.943043075381809
sertad3	0.537605939547457	7.2845326753699	3.89644564530869	0.000801625703059158	0.00832184974538408	-0.945024583532687
cd33	-1.42326458448268	5.00879835362609	-3.89638565545083	0.000801741641463556	0.00832184974538408	-0.945165474361095
pan2	0.645065184970289	5.90450794549619	3.89434708002384	0.000805691361087538	0.00835047862774126	-0.94995302253266
gtf2e1	-0.598241959851484	7.02402658444088	-3.89426618144797	0.000805848498760463	0.00835047862774126	-0.950143002811204
bcl2l11	0.963058368850056	2.51815679409417	3.89349164133719	0.000807354507606082	0.00835908935425261	-0.951961882547158
alpl	-1.4979354549714	5.26953105755963	-3.89219930855737	0.000809873524487562	0.00837232388124028	-0.954996584964923
mydgf	-0.726973168272519	8.61281911307598	-3.89198335722675	0.000810295216542983	0.00837232388124028	-0.955503674030829
tpd52l1	1.06375136932568	8.05082106947118	3.89179607893855	0.0008106610945334	0.00837232388124028	-0.955943430472421
parp1	-0.576389533478021	7.87977279412726	-3.89097952284409	0.00081225828251919	0.00838182859369595	-0.957860782585252
hnrnpm	0.895955054332163	6.80738771354512	3.89026430922229	0.00081365980766246	0.00838930008183534	-0.959540120111778
oas3	-0.678791637113436	6.90482893538596	-3.88703456938211	0.000820018697643854	0.00844080759179039	-0.967123006221859
lipa	-0.95225929920692	9.96452129939269	-3.87948195895274	0.000835081690993913	0.00858476167091173	-0.984851307237324
pask	-0.869210512855027	5.1512963020716	-3.87932864876029	0.000835390278078708	0.00858476167091173	-0.985211115635306
bcl2l2	0.406246880712563	7.65326219982158	3.87776957489221	0.000838534853720082	0.00860993125507113	-0.98887002260959
slc38a6	-0.776208254520963	7.22233085447655	-3.87618362923322	0.00084174566828898	0.00863573869960434	-0.992591747652447
tgfbi	-0.748395488566402	11.0708177231711	-3.87248198757074	0.000849287298557932	0.00870589786261827	-1.00127738943124
faf1	0.690782638046016	6.76696321466585	3.8715220813188	0.000851253899200192	0.00871883956476095	-1.00352951960043
psmb2	-0.620324108168829	8.1163656963659	-3.87043753241338	0.000853481292097911	0.00873442879342845	-1.00607397557239
sh2d1a	-1.1969683973497	4.17294085394775	-3.86973128604372	0.000854934850755265	0.00874207948546858	-1.00773083427716
exoc2	-1.14419223898906	5.14719615978362	-3.86824455729358	0.000858002780980177	0.00876229828672193	-1.0112185467332
jag1	0.69516621935924	7.00171327796075	3.86808756879038	0.000858327369926003	0.00876229828672193	-1.01158681265653
znf652	-1.09107739606071	6.10600797063368	-3.86492169016353	0.000864899166969036	0.00882211399059109	-1.01901284838357
vav3	-1.01358912411591	5.68582433766187	-3.86356819708555	0.000867723970779585	0.00884364274087539	-1.02218735802027
cmc2	-0.569916011103609	7.21573696612816	-3.86220287930323	0.000870582716500817	0.00886548172568225	-1.02538941387166
tm9sf2	-0.637514622566426	9.63961748283787	-3.86086782908373	0.00087338711193354	0.00888673180531883	-1.0285203010274
qpct	-2.27986664757478	4.78514665021543	-3.86009916121521	0.000875005828328357	0.00889589258800496	-1.03032285698047
tpp1	-0.757394324444924	7.99492542284273	-3.85936693215741	0.000876550573985606	0.00890428692179144	-1.03203990660509
mapk7	0.833751862760667	6.17553989535138	3.85780323848757	0.00087985847065111	0.00893056347710876	-1.03570652654805
abcf2	0.798803747337188	5.58507766069427	3.85701855368154	0.000881523080565788	0.00894013129127449	-1.03754639704839
rsad2	-0.985911710129947	5.67194577339633	-3.85628208843751	0.000883088237381534	0.00894867564934168	-1.03927314861569
mfge8	0.986277997982677	7.87883763513653	3.85578410160284	0.000884148133245923	0.00895209021584977	-1.04044072084326
mt1g	0.792829615165925	8.10489382541036	3.85450609755639	0.000886873959023801	0.00897235313283638	-1.04343699296828
s100a8	-1.71510219574354	7.64585915019915	-3.85330136726093	0.00088945112426689	0.00898503880615966	-1.04626132162135
bcas2	0.743999785092015	7.90056469216128	3.85324164925672	0.000889579066167467	0.00898503880615966	-1.04640131859097
ppp4r4	0.942003439393938	2.46244217518854	3.85108954830531	0.000894201989764272	0.00902437101813446	-1.05144624537753
uggt2	0.784055383414049	6.70284265973222	3.85018403588045	0.000896154225986306	0.00903670829021859	-1.05356879273854
tbc1d31	-1.14322838933388	5.05355178293789	-3.84870088082894	0.000899360954713659	0.00906166533947863	-1.05704516772759
zfp36l1	0.867264606448024	6.24344679280757	3.84718860380217	0.000902642352434766	0.00908733353674773	-1.06058956680384
sccpdh	-0.634928339610477	6.4560228332994	-3.84544352047141	0.000906443643944375	0.00911818979932022	-1.06467930984511
mpp1	-0.734087157772287	8.66925503540336	-3.84476034034727	0.000907936121457232	0.00912578976623774	-1.06628031085768
gabra2	1.0976983652995	3.98466110207381	3.84414272130039	0.000909287468895643	0.0091319600383899	-1.06772763054686
olfml1	-1.0881730460926	7.76522859073289	-3.84303876918755	0.000911707875636468	0.00914884815559674	-1.07031451679791
mapkapk3	-0.423591078793573	7.44821033388638	-3.8422020250397	0.000913546681561056	0.009159877374713	-1.0722751706927
fbln2	1.83151974794403	6.91397900001017	3.84155348026772	0.000914974432283833	0.00916677054609281	-1.07379478638967
ak4	0.978751427475913	5.86107066454723	3.84090904060477	0.000916395334893658	0.00917358401939221	-1.07530473956557
cbr3	-0.817931662559963	7.65508128864894	-3.84000717314641	0.000918387501232185	0.00918610050707443	-1.07741778511345
grk5	0.643284193682705	8.10407089672752	3.83766214600469	0.000923587612153698	0.00922736108431768	-1.08291170455115
csrp2	0.923376962784781	7.15302079042973	3.83747543923754	0.000924002886582728	0.00922736108431768	-1.08334909538927
ncr3	-0.86038511527192	3.64242579232952	-3.83688544337458	0.000925316375140342	0.00923303196886612	-1.08473123199652
pex5	1.04889987987037	6.31225967076195	3.83301350679239	0.000933982345776761	0.00931199950704801	-1.09380079475592
plcb1	0.785970137265941	5.37608963040867	3.83179499000867	0.000936726158189228	0.00933184233053678	-1.09665469896772
wdr60	1.29902766757284	3.51956431179728	3.82902761320178	0.000942987321787577	0.00938666559943373	-1.10313561891735
tap1	-0.743932605575568	7.82566006334626	-3.82805584414807	0.000945195755998139	0.0094010916036345	-1.10541121012757
klhl21	1.84663678803053	5.67295045092214	3.82748419552311	0.000946497271360623	0.00940648130919631	-1.10674979206963
gpr25	-1.50811048465279	2.25804098104429	-3.82604410866928	0.000949783896141632	0.00943157496866225	-1.11012176747219
dnase1l1	-0.658971950242293	7.55668499522885	-3.82279003017567	0.000957252156976313	0.00949811975948533	-1.11774039469278
ier3	1.81766419836827	9.75874265887403	3.82209874071197	0.000958846169830526	0.00950631875181058	-1.11935873182965
h1f0	1.41836441330994	8.60956270971143	3.8216994902181	0.000959767980122206	0.00950784551828262	-1.1202933700598
tent5a	0.872938130226423	10.0864243878531	3.82113381985143	0.000961075531516737	0.00951318809494145	-1.12161756456106
tefm	-1.09094506660685	6.0214230663112	-3.82037521369485	0.000962831824096873	0.00952193852225852	-1.12339335352027
sema3c	-0.77758914515851	8.53136934932545	-3.81977068861227	0.000964233669183766	0.00952193852225852	-1.12480841576236
fut4	-0.65819596506505	5.75972847556192	-3.81961885562646	0.000964586075017107	0.00952193852225852	-1.12516381762768
edem1	-0.685061850571744	7.38953899868544	-3.81942536276989	0.000965035358591168	0.00952193852225852	-1.12561673086397
ift20	-0.533366721924833	7.26092156322684	-3.8188785950397	0.000966306053995547	0.00952214961667006	-1.12689654074541
rragc	0.534933550188647	9.1586247749443	3.8187544962462	0.000966594691767283	0.00952214961667006	-1.12718701212655
fah	1.20775308970033	7.13782587327373	3.81677114913974	0.000971219299445739	0.00956010221386056	-1.13182909771573
med13l	0.492588811306939	6.76745462078309	3.81439002482542	0.000976800349892724	0.00960521361082609	-1.13740162376983
tnfsf9	1.09953030429266	6.59653601232026	3.81415473421954	0.000977353561305086	0.00960521361082609	-1.13795223865979
rad17	-0.727281711788088	6.60904551017425	-3.80964309922311	0.000988021424869212	0.00970235472177276	-1.14850895201887
gmip	-1.27268721597036	5.71201894518773	-3.808455311123	0.00099084908805914	0.00972241224836476	-1.15128786663475
fgr	-1.29599750222423	7.54613428156598	-3.80790752817911	0.000992155843941745	0.00972752637809235	-1.15256939094545
clic1	-0.564649813333856	10.30307753365	-3.80498686421987	0.000999152033780644	0.00978836996384946	-1.15940164630546
evl	-0.959410345834547	7.21228949121177	-3.80235838619955	0.00100549004189828	0.00984267445757029	-1.16554958178902
ifnar2	-0.629377159422472	6.7057204879877	-3.79943580793542	0.00101258392364142	0.00990428651378488	-1.17238449901539
uba2	0.653997059488926	8.4454818974017	3.7979639847497	0.00101617515883999	0.0099315682651268	-1.17582622886359
lif	3.06294043353574	5.52368579633358	3.79621374186319	0.00102046214063346	0.00996560148853635	-1.17991870010384
sh3gl1	0.973108334356121	7.42607232870193	3.79557248053627	0.00102203729758096	0.00997311887781326	-1.18141803001517
scd	1.86587788188545	5.93053932760971	3.79516507345819	0.00102303927785096	0.00997503573041606	-1.18237056223835
siglec15	1.23312090532417	5.59979674796408	3.79184176274648	0.00103124903209465	0.0100471729067097	-1.19013987579042
camsap2	0.60511145938281	6.70270115588951	3.79086941070425	0.0010336633858302	0.0100627780713328	-1.19241282504661
slc29a3	-1.08032669960793	7.04055025198771	-3.79001110813064	0.00103579919977458	0.0100756492465111	-1.19441908489497
spata6l	1.10272483743878	3.19671025336541	3.78722208717533	0.00104276962757	0.0101336854415515	-1.20093776558607
gpr20	1.47528552679133	3.0477665291267	3.78696991064193	0.00104340215924882	0.0101336854415515	-1.20152712489597
ctnnal1	0.73251803273518	7.84793684962574	3.78194098953684	0.0010560956846102	0.010247689526912	-1.2132786354372
acsm5	1.19183250814853	6.52921901031827	3.78166545111566	0.00105679556859135	0.010247689526912	-1.21392242510776
pcdh1	1.138604918625	4.77468985606043	3.7812179586315	0.00105793320361969	0.01024889528914	-1.21496796302062
vegfc	-1.22133492034556	7.35160988358456	-3.7808316738532	0.00105891620760966	0.01024889528914	-1.21587047429616
tacc2	0.702309991099218	6.88381673698654	3.7806405571515	0.00105940288864566	0.01024889528914	-1.21631699073059
znf423	-0.983236376390278	7.54491609004697	-3.77857307121339	0.00106468192708587	0.0102919252951634	-1.22114709988761
vdr	-0.575600529860647	5.98793446053111	-3.77751141791536	0.00106740281110741	0.0103066687493372	-1.22362716562629
mrps34	-0.902121701105208	5.57585230096852	-3.77685593068532	0.00106908617448022	0.0103066687493372	-1.22515834500785
timeless	-0.664335724417916	5.38732091241548	-3.77674519865461	0.00106937080559338	0.0103066687493372	-1.22541700351965
angptl2	-0.880264071250092	8.94112233519947	-3.77647276717074	0.00107007139600451	0.0103066687493372	-1.22605336903843
echdc3	0.95969314225503	6.0376861725481	3.7763571983412	0.00107036873226582	0.0103066687493372	-1.22632332059642
cep68	0.717243875213158	7.13560244095498	3.77489277552278	0.00107414349263068	0.0103291749885423	-1.22974385850769
brca1	-1.14716327932113	4.10353253295902	-3.77480338528548	0.00107437433459117	0.0103291749885423	-1.22995264436534
ccng2	0.861511482524274	7.4110769595215	3.77187211635342	0.00108197130019857	0.0103941432198285	-1.23679859327468
traf5	-0.752952971957588	7.46183777179608	-3.77043596956381	0.0010857127204273	0.0104194673565035	-1.24015233019273
pcdh9	1.39647260017485	5.03589583704578	3.77021471452874	0.00108629026546443	0.0104194673565035	-1.24066899053389
kctd9	0.751707119914627	7.01504138006918	3.76956552078065	0.00108798661836131	0.0104212471364921	-1.24218491207456
itpkc	0.856611611635531	7.44520821718386	3.76949961718998	0.00108815897177456	0.0104212471364921	-1.24233879966792
acot7	-1.0777535996857	5.51685384716099	-3.76777204407092	0.0010926866224903	0.0104565212104307	-1.24637257046496
lyl1	-1.52598239463416	5.28491647836221	-3.76575799893981	0.0010979885792047	0.0104957227335474	-1.25107478767789
xcl1	-1.36920840113866	3.30801812141004	-3.76557245866363	0.00109847828980678	0.0104957227335474	-1.25150794669728
herc6	-0.848001948669177	5.86287017962845	-3.76237879307013	0.00110694149565581	0.0105684321825026	-1.2589631780048
lgalsl	1.3650110960301	3.43393358949352	3.76098984975989	0.00111064227177959	0.0105887969761783	-1.2622051200232
rrs1	0.899438141299115	6.79339871961704	3.76093647624391	0.00111078472680736	0.0105887969761783	-1.2623296948972
tsc22d2	0.707263209324274	4.45026965116749	3.75942767450825	0.00111481922960907	0.0106190819386532	-1.26585112745847
hs3st2	1.4870901523721	7.17636753404687	3.7565407564262	0.00112257919352512	0.0106847795183871	-1.27258821920121
wdr11	-0.644500656841127	7.33050402482345	-3.75580765716617	0.00112455823007055	0.010689982636667	-1.27429886522165
dlg5	0.74180047058639	6.21958285280345	3.75569879277	0.00112485240859057	0.010689982636667	-1.27455288864784
nampt	1.36133499618123	9.36330017032233	3.75469212196203	0.00112757628758932	0.0107076512033885	-1.27690177940061
ap1s2	-0.527394968513827	7.97006378785048	-3.7530229001415	0.00113210728825823	0.0107424402685837	-1.28079634683364
fzd10	1.26071924770189	7.89509688609982	3.74937774015245	0.00114206448859608	0.0108286252391158	-1.28929992386915
wnt5b	-1.06791671962433	3.59350688904565	-3.74742404769618	0.00114743680574088	0.0108712394533201	-1.29385690962124
mat2a	0.904154599316191	8.38853609852697	3.74606959155046	0.00115117597437624	0.0108983272864686	-1.29701590295874
cspg4	1.03245500150259	5.52866350944472	3.74361979847075	0.00115796957872592	0.0109463770432438	-1.30272897457407
cryba4	-1.07808837894037	2.1086631984752	-3.74360189408814	0.0011580193754865	0.0109463770432438	-1.30277072600279
znf230	1.26783816470228	3.99792241584994	3.74225952545492	0.00116175888433214	0.0109733487907589	-1.30590089777494
fcer1a	-1.28348248645311	5.24045109602786	-3.7381826920487	0.00117318922187253	0.0110728674805241	-1.31540600338273
zbed2	-1.58201210790496	5.08063113598826	-3.73783050154947	0.00117418186582091	0.0110737959211427	-1.31622703610608
ralgps2	-1.12486281286284	4.15558046901338	-3.73492050904078	0.00118241544651155	0.0111429607870263	-1.32301027138986
acsl5	-0.556730958454247	7.07461989956627	-3.73294328422034	0.00118804234833414	0.0111874740680012	-1.32761860855003
phlda1	1.18425300496539	6.28004826794342	3.7322562829342	0.00119000364094053	0.0111974278767223	-1.32921969461414
ccpg1	-0.605583988122885	7.24212011433727	-3.73115419110917	0.00119315664042826	0.0112185715098125	-1.33178804342888
pex2	-0.530661116563889	7.17917633407387	-3.72906593263743	0.00119915362978501	0.0112664031848466	-1.33665416694303
tagln	1.48270143854698	9.59469029780652	3.7262557041472	0.00120727095165591	0.0113340683808606	-1.34320177963481
ormdl2	-0.666815091467914	8.03126824766488	-3.7250302479444	0.00121082763835501	0.0113588474589016	-1.34605668421283
adgrg2	1.76310967148546	8.17561601779862	3.7234182765741	0.00121552188206312	0.0113942524342072	-1.34981175042153
rab5if	-0.525055118992581	9.42356485911531	-3.72122646908261	0.0012219335127112	0.0114392492353783	-1.35491700750859
atf7ip	-0.766412500725541	5.52528870862774	-3.7211459638569	0.00122216964696806	0.0114392492353783	-1.35510451227241
dcxr	1.88415632807009	6.53362851066283	3.71997895669328	0.00122559772347523	0.0114626711554333	-1.35782249642285
adcy3	0.53059390373374	7.45589276304573	3.71697115042935	0.00123447696039169	0.0115370024154946	-1.36482693769184
usp19	1.46604512830119	4.73541848122701	3.71419749284826	0.00124272124089269	0.0116020108238789	-1.37128507575293
dynll1	-0.675580668952028	10.4941353636501	-3.71400117518043	0.00124330682090667	0.0116020108238789	-1.37174214102939
hexb	-0.515112730152413	10.3016357523484	-3.71242465951172	0.00124801916769755	0.0116372148746978	-1.37541239241909
stimate	-0.539103968842576	5.90876900938032	-3.7102025579412	0.00125469117856685	0.01169062517998	-1.3805850728074
dusp5	1.08489758355667	7.49063626408586	3.70914922769854	0.0012578661615726	0.0117113959990628	-1.38303682581486
gpr17	-0.77225256804349	2.11107580226211	-3.7078675202375	0.00126174022306893	0.0117386395058321	-1.38601996005059
zwint	-0.752061952992551	6.7778858161483	-3.70741463532335	0.00126311191693468	0.0117425787292809	-1.38707398453782
cxcl2	1.84105620001037	9.03277178308065	3.70571842258083	0.00126826248201625	0.0117816161401405	-1.39102143834921
fdft1	0.541604255474825	8.31618525652736	3.70408247396001	0.00127324968767288	0.0118190786225287	-1.39482828894053
mboat7	-0.743901454941086	5.10789893670705	-3.70264302716337	0.0012776538579262	0.0118510769458428	-1.3981775905679
capza1	-0.5883154516183	9.48338939153939	-3.70035360173138	0.00128468963304381	0.011907418956573	-1.4035040609559
ptp4a1	0.605833211604088	7.44188757577444	3.69977895292753	0.00128646161569808	0.0119149245977482	-1.40484090392684
dhcr7	0.931173327171208	5.48650357946181	3.699458840261	0.00128744975832528	0.0119151646915859	-1.40558558404333
phf1	0.814223058054805	7.48301691015411	3.69832049645191	0.00129096973553482	0.011938818696884	-1.40823361108191
dennd2d	-1.69938120943846	6.67412048729748	-3.69788945694623	0.00129230506934492	0.0119422490102225	-1.4092362550027
stxbp6	0.835377902952543	4.7750889809214	3.69757812252891	0.00129327041172587	0.0119422576498147	-1.40996043685359
c1orf174	-0.675898540999205	7.35486953739533	-3.6969306509919	0.00129528028018988	0.0119519044035703	-1.41146645208269
slc16a3	-1.25619570282991	7.18019618022668	-3.69621275470913	0.00129751236267141	0.011963585693939	-1.41313621010611
loxl1	-2.02874790171051	7.76776134837147	-3.69104744390239	0.00131368460451693	0.0121031545296772	-1.42514821384583
svil	0.67588817604611	6.57581751813885	3.69075564370332	0.00131460412197495	0.0121031545296772	-1.42582669346879
arl4a	0.83565757117402	7.5089089010245	3.68990521628565	0.0013172876022118	0.0121048783791565	-1.42780400112233
serinc5	-0.761580941606112	7.01749793555371	-3.68985115847494	0.0013174583614041	0.0121048783791565	-1.42792968633125
ptprz1	0.922916589000358	3.86472273645227	3.68976708416483	0.00131772398086917	0.0121048783791565	-1.42812515956949
id2	0.857880094047847	8.28063610597971	3.68911260688144	0.00131979350515835	0.0121149021307456	-1.42964679060204
grk6	-0.720013095184016	5.71663592630845	-3.68875220053721	0.0013209345155095	0.0121163941522623	-1.43048469512844
cep170	-0.593553010758199	8.29228056520338	-3.68706060578272	0.00132630294924715	0.0121538250656009	-1.43441723183811
arrb2	-1.68042873589685	7.4531369674898	-3.68684830132183	0.00132697823537853	0.0121538250656009	-1.43491075977949
lhcgr	1.43537306533989	2.66327441528835	3.68452834696976	0.00133437955220259	0.0122125809275127	-1.44030338581583
dkc1	0.659055431457226	7.68958038639887	3.68407754636517	0.00133582245211077	0.0122167573297546	-1.44135116688729
apol2	-0.870157372003312	5.48385093277634	-3.68365696731766	0.00133717000785519	0.0122200562415283	-1.44232868030661
gna15	-0.799313890710507	6.56754610386813	-3.68186954873226	0.001342911956102	0.0122634799059078	-1.44648274778007
vash1	-1.01923388892705	6.25270032896978	-3.68048383265992	0.00134738019213146	0.0122906778930951	-1.44970293766171
hnrnpa0	0.553371450484164	8.3320696023581	3.68021507572399	0.00134824849379823	0.0122906778930951	-1.45032745714192
srsf3	0.678465833581335	8.92392453508823	3.68002345998673	0.00134886790411986	0.0122906778930951	-1.45077271506568
b3galnt1	-0.820243587106777	4.61695867296138	-3.67871344410419	0.00135311013955736	0.012320266807455	-1.45381666863159
sit1	-1.23654155113687	4.49652354814746	-3.67819941505996	0.00135477831584738	0.0123263922741647	-1.45501100317428
atn1	0.710376252641115	5.94167239544157	3.67588402697308	0.00136231761061075	0.0123858876447819	-1.46039030830981
ugp2	0.712674781541546	10.2944281006098	3.67482976919919	0.00136576414454841	0.0124081125472802	-1.46283940708241
fam13a	0.71053994891229	8.09348571164152	3.67301078621661	0.0013717309097376	0.012453184644634	-1.46706464776278
slc25a37	1.0476698935769	6.00716349441993	3.6709269343389	0.00137859810997605	0.0125063592643468	-1.4719045849495
eps8	0.721404964842801	9.48735557113057	3.66792228380261	0.00138855944889855	0.0125875048724091	-1.47888211178701
ccdc170	-1.42343775946242	4.37307775627675	-3.66725934556905	0.00139076682939944	0.0125982923543915	-1.48042144766104
mrpl35	-2.17699488134213	4.58131654596391	-3.66676468934125	0.00139241613571303	0.0126040124331393	-1.48156999491881
rsl1d1	0.758092391193944	7.00516689824627	3.66613034878777	0.001394534006053	0.0126057526576482	-1.48304282716767
spidr	0.812413542449178	5.36451266453041	3.66609732106469	0.00139464436251135	0.0126057526576482	-1.4831195104721
tnfrsf25	-0.777062210012758	4.42190171760298	-3.66137134388316	0.00141052446995421	0.0127399887027301	-1.49409066035523
lmcd1	0.93028423112488	8.14577789621845	3.66093774884588	0.0014119903196795	0.0127439330383318	-1.49509707699624
dock1	0.495891701823999	7.67363682672047	3.66017834123429	0.00141456125864519	0.0127578383581962	-1.49685967352426
trim34	-0.785890535830303	6.48554447334558	-3.65902761132216	0.00141846579569813	0.0127815317311295	-1.49953038180955
iffo1	-0.667526976500563	8.07573122093186	-3.65879607725256	0.00141925269565558	0.0127815317311295	-1.50006772272297
rhof	-0.960669614726663	6.08211272403489	-3.65800299679949	0.00142195134931029	0.0127965287489167	-1.50190823558974
ccl24	-1.55702733516619	3.84628156618595	-3.65576337680513	0.00142959954823652	0.0128502062503109	-1.50710527781904
agpat3	-0.919699493126421	5.11324616125231	-3.65564893250641	0.00142999145707247	0.0128502062503109	-1.50737082714644
sertad2	0.789926626290164	8.72919883824588	3.65455075953382	0.00143375748239891	0.0128747055145364	-1.50991886495559
vegfa	1.40397987210004	7.43871253012668	3.65398408773399	0.00143570462251928	0.0128828480729393	-1.5112336199596
taf15	0.866806987083997	6.69946221907028	3.65284517453739	0.00143962592517175	0.0129086805440998	-1.51387591558188
tmem158	-1.95510991432611	4.68627766596636	-3.65007665981381	0.0014492020413149	0.0129830215727385	-1.52029814874705
pcdh12	-1.47340685071594	5.49301035501759	-3.64984285239808	0.00145001363442601	0.0129830215727385	-1.52084047149787
trak1	-0.658065502115512	6.24705511569392	-3.64786899963707	0.00145688315148853	0.0130351040931231	-1.52541856903049
ppp2r5c	-0.930264233292568	6.30827524410595	-3.64429351754135	0.0014694084923743	0.0131283163704184	-1.53371003169593
lrrc1	0.714488433700492	4.704555131897	3.64428981875552	0.00146942150443349	0.0131283163704184	-1.53371860815528
snapc1	0.849564057318758	6.39581992473583	3.64348090331208	0.00147226993870254	0.0131442816517329	-1.53559421203799
fxyd1	1.02131333607444	7.91746338055365	3.642066827453	0.00147726239563484	0.0131793517616327	-1.53887275581494
arc	2.41067871927296	4.3188056471735	3.64109401060611	0.001480706647121	0.0132005690506115	-1.54112807182826
gmeb2	0.531043209520733	7.44514824698377	3.64041176409359	0.00148312685405502	0.0132126329739305	-1.54270966744269
ybx3	0.696331418548866	8.22081702558105	3.63702024375272	0.00149521591040998	0.0133107538595304	-1.55057095703834
p2ry13	-2.40981468298591	4.3154092182438	-3.63411714347343	0.00150564105137252	0.0133939318528347	-1.55729881025154
secisbp2l	0.558261197910806	7.27227528125981	3.63356435003528	0.00150763425090301	0.0134020351248614	-1.55857975554527
nxpe3	-1.48469416892269	4.32912240586349	-3.63293471892711	0.00150990766853637	0.0134126159680674	-1.56003869694333
mef2c	-0.662847973100045	7.00731561267493	-3.63076527416064	0.00151776679871783	0.0134727643501957	-1.5650651572146
mlf1	0.899576966452367	5.02301455567256	3.62721251033294	0.00153072428933165	0.0135780507699096	-1.5732951990685
eml4	-0.769704404286058	6.15676047367638	-3.62516415719363	0.00153824439568177	0.013630331173403	-1.5780394095463
cnn3	0.790533635510816	7.99392697581092	3.62500788993299	0.00153881958979386	0.013630331173403	-1.57840131646551
pelo	0.794882828979287	4.20848539484748	3.62335270345157	0.00154492507447458	0.0136746298764966	-1.58223442339023
mocs1	0.838889347232102	5.66323143369684	3.623052911943	0.00154603346332526	0.0136746659831119	-1.58292864231401
itga7	1.48858619597952	6.21344260285013	3.62205328813899	0.00154973493169668	0.0136976214555317	-1.58524334820218
nckipsd	0.792582875933623	6.09907087204405	3.62128190286319	0.00155259722699405	0.0137131322837855	-1.58702944980402
emx2	1.66999879501094	5.3580786804054	3.62067857246574	0.00155483956592391	0.0137231492122849	-1.58842636824693
sp110	-0.524140231452218	7.32256802456717	-3.61812472387124	0.00156436656541843	0.0137974011250544	-1.59433881633913
rcbtb1	-1.13952325514966	6.29185678986704	-3.61753902937786	0.00156655955562534	0.0137991893811804	-1.59569462951681
atp1a2	1.60572300829308	5.12747132935775	3.61699229986793	0.00156860938162314	0.0137991893811804	-1.59696019759888
rab11fip1	-0.775209444549711	6.53666806943103	-3.61677659980908	0.00156941882129877	0.0137991893811804	-1.59745948737792
lins1	-1.58454399294891	3.4548838966769	-3.61648395100395	0.00157051767747886	0.0137991893811804	-1.59813688256399
prkg1	1.06126782698657	2.48092434511003	3.61639877516245	0.00157083764335858	0.0137991893811804	-1.59833403699121
sigirr	-0.720057179053184	6.51269412919193	-3.61628756255341	0.00157125551380637	0.0137991893811804	-1.59859145646662
sac3d1	-1.70557153174335	3.83465716465512	-3.61544529823665	0.00157442379341052	0.0138172146235312	-1.60054095321651
cenpu	-0.672026420479525	5.94623118264554	-3.61461602646586	0.00157754934308167	0.0138326235495676	-1.60246027473878
syngr1	-0.693045496093755	4.99364119609422	-3.61438697558266	0.0015784137184478	0.0138326235495676	-1.60299038728211
apobec3g	-0.954903073030312	4.99004924951925	-3.61270359826875	0.00158478064174382	0.0138785987883407	-1.60688613573205
cdc16	-0.530297597802026	7.72223560355032	-3.6121652844634	0.00158682199832212	0.0138866549860232	-1.60813183706984
esf1	0.688633399518684	6.77075880110064	3.60864101054031	0.00160025058370687	0.0139942817641541	-1.61628622158668
psmd11	1.02925262279884	6.83104814533775	3.60604871036068	0.00161019937929967	0.0140676327274015	-1.62228304009347
taf1c	1.01204977596908	5.12025604223301	3.60535728108769	0.00161286322995092	0.0140676327274015	-1.62388236648629
psd4	-0.991131565285365	5.30598289604326	-3.60534347487447	0.0016129164649053	0.0140676327274015	-1.62391430053362
mybl1	-1.60427933884627	3.5618014371068	-3.60527449564236	0.00161318246571187	0.0140676327274015	-1.6240738504479
bhlhe40	1.35031363888177	8.98923501422978	3.60408120531094	0.00161779092359653	0.0140978923341984	-1.62683383409754
asic3	1.12539434631731	4.48134332849231	3.60215105082893	0.00162527256906909	0.0141531295518865	-1.631297670455
lat	-0.688653066541621	5.08016169221277	-3.60146872687106	0.00162792552219474	0.0141620859973658	-1.63287553525101
zkscan4	-1.08497680770249	5.84974301827205	-3.60129840313744	0.00162858842447298	0.0141620859973658	-1.63326939557462
nupr1	0.901114782763083	9.69293857561126	3.59892078860429	0.00163786990886398	0.0142328021624299	-1.63876698490661
rufy1	-0.431795137078295	8.79844842930071	-3.59829781715196	0.00164031039152446	0.0142440137294863	-1.64020729591122
tmem100	2.15809834891738	8.37367660882661	3.59583055635307	0.0016500110429676	0.0143182107533762	-1.64591102760944
il2rb	-0.51290768430939	7.38757745156984	-3.59506076517367	0.00165304920354037	0.0143345296130535	-1.64769041568753
endod1	0.480960195646188	7.28654479369476	3.58947585531028	0.00167525674104452	0.0145169378756853	-1.66059733754124
pde4d	0.997989766853801	5.10199171806228	3.58721520447731	0.00168432906651472	0.0145853474340222	-1.66582042025204
moap1	0.683197744552148	7.31601258468474	3.58330912004729	0.00170011876102087	0.0147017499289897	-1.67484331013795
mtmr2	0.723639344848308	6.33300689079336	3.58326788406526	0.00170028622459224	0.0147017499289897	-1.67493855092839
scml2	0.587884120901541	7.05331322267586	3.58301019606095	0.00170133308957782	0.0147017499289897	-1.67553371471429
efnb2	1.00957282679468	7.28761505742109	3.58224164448672	0.00170445911809266	0.0147184918126509	-1.6773087228891
oxsr1	0.56695629498533	7.53782382914668	3.57651914477716	0.00172791322456564	0.0149106268012518	-1.69052223408478
ahctf1	0.6092589457817	6.1239285786237	3.57386628635189	0.00173889353325555	0.0149849644539479	-1.69664607046449
nod2	-1.73641007172534	5.40489951566552	-3.57385315193122	0.00173894806753801	0.0149849644539479	-1.69667638710941
fadd	-1.07333772703243	6.44761296203895	-3.57168183939058	0.00174798653539321	0.0150523764031809	-1.70168780122319
tmem74b	-0.646581611463886	6.63903101131223	-3.57027506585713	0.00175386711110235	0.015092520108951	-1.70493425484996
tenm4	-1.66904522771188	3.72321424987575	-3.56979062369648	0.00175589666746552	0.0150992927475606	-1.70605214444724
zbtb20	0.788413193061238	8.22975619000307	3.56935824191667	0.0017577100679265	0.0150992927475606	-1.70704986923756
pcsk7	-1.15447399309512	5.80534621475358	-3.56921476504738	0.00175831221367862	0.0150992927475606	-1.70738093686852
dok3	-1.50432946282042	4.15065316671971	-3.56858722853059	0.00176094825136705	0.0151114498937479	-1.7088289162572
m6pr	-0.756837771956931	7.9605543736307	-3.56774898862946	0.00176447543259038	0.0151312321895891	-1.71076297614953
rftn1	-0.53072771095812	9.04637777588812	-3.56673659469246	0.00176874468505768	0.0151573463218472	-1.71309871123394
arih1	0.53098575237484	7.07634324423269	3.56571046058881	0.00177308223917602	0.0151840092446173	-1.71546598122962
dnase2	-0.667416941362085	7.62377450362328	-3.56139177094044	0.0017914525670893	0.0153307236615527	-1.72542727599843
acvr1b	0.68483711220729	5.19525819954674	3.55974692095975	0.00179849830729219	0.0153803898751376	-1.7292204317751
gne	0.621794627409747	7.22598659538641	3.55889415461311	0.00180216185557629	0.0154010836836447	-1.73118680917595
zbtb43	0.719669044761456	6.63580897097521	3.55779206208462	0.00180690739142081	0.0154309891227337	-1.73372793067572
ect2	-1.42836548129605	4.71418754296807	-3.55741793727579	0.00180852113731658	0.0154341262876576	-1.7345905151131
sema3e	2.20995120759827	5.66033374946402	3.55614551842749	0.00181402018000773	0.0154666187802362	-1.73752404382044
fbxl7	0.557528799557769	7.43071100073372	3.5559592533422	0.00181482654346146	0.0154666187802362	-1.7379534513553
gnpda1	-0.767486383353518	7.29171406298223	-3.55556408084093	0.0018165384579799	0.015470561021434	-1.73886444663552
ttc31	-0.574750483720564	6.6267647433156	-3.55518850450942	0.00181816695097542	0.0154737878721159	-1.73973024341139
ffar2	-1.36091632345769	2.97847958783341	-3.55313707721358	0.00182708725191187	0.0155258621509018	-1.74445889273267
pkd2	0.63572007335784	7.6476408861524	3.5530101502907	0.0018276405833899	0.0155258621509018	-1.74475144379991
actr2	-0.7183045491063	8.77956177842459	-3.55291692894481	0.00182804708196841	0.0155258621509018	-1.74496630597177
lgr4	1.17147669710338	5.78656340486335	3.55206933525338	0.00183174715447208	0.0155466244097517	-1.74691982666433
cerk	-0.709178027724744	7.36862316969483	-3.55062138284118	0.00183808505022056	0.0155785832436791	-1.75025677650312
sdr39u1	0.442703671942247	7.99928290219264	3.55040555048021	0.00183903162246812	0.0155785832436791	-1.75075415455748
nlk	-0.673380854088399	5.44865033980715	-3.55031741458513	0.00183941829621542	0.0155785832436791	-1.75095725844934
stc1	1.09601882631486	6.27560567371586	3.55006073146582	0.00184054488294457	0.0155785832436791	-1.75154876216733
rbm39	0.718064013221918	9.55144729439161	3.54953939646254	0.0018428351181553	0.0155873137077303	-1.7527501001071
agl	-0.64479349027945	6.85683915174041	-3.54899885315645	0.00184521269174903	0.0155967704859578	-1.75399565422169
aqp7	1.40269036254569	4.26799970239224	3.54658905266737	0.00185584888163672	0.0156759731932521	-1.75954789271792
idh3b	0.417208698689227	7.72112274870818	3.54629386129138	0.00185715590734852	0.0156763201095411	-1.76022795594985
ddost	-0.5620657716289	9.38419367760209	-3.54514229074154	0.001862263391666	0.0157087245088556	-1.7628808139306
slc5a4	-0.955067438731859	4.4321713064287	-3.54415893500422	0.00186663572223431	0.0157348877797328	-1.76514598675706
arpc3	-0.746863141944019	9.0543357711224	-3.54244623473187	0.0018742750482798	0.0157885360019379	-1.76909083777775
tspan8	0.87891640977766	5.24865586284486	3.54210128968716	0.0018758173512745	0.0157907860372754	-1.76988528943155
pnmt	1.30567780925474	5.16323711170705	3.54165251516052	0.00187782575773059	0.0157930131175072	-1.77091884427773
akap8	0.486695730412037	7.57591370547217	3.54147234544891	0.00187863266753518	0.0157930131175072	-1.77133377674266
lpgat1	-0.565201635902156	7.11422761207118	-3.53929571564524	0.00188840788850169	0.0158644198665647	-1.77634615479373
atp6v0b	-0.655088850625161	9.17343118350225	-3.53892331632386	0.00189008532630147	0.0158677468444685	-1.77720364412916
klk15	-0.719444043083978	2.46723740581301	-3.53839751298958	0.00189245624972399	0.0158768873579487	-1.77841432388159
lamp2	-0.636700533296176	8.48869748731155	-3.53714257110662	0.00189812677369414	0.015912746605951	-1.78130368595
cln6	-1.23398509016353	4.18961730501804	-3.53688324916991	0.0018993006124199	0.015912746605951	-1.7819007131619
cdk17	0.600919138664673	7.01687341410459	3.53602489444338	0.00190319110116847	0.0159345607882144	-1.78387679224621
gse1	0.688036991527523	7.73338616053156	3.5353419943538	0.00190629193070221	0.0159455716021541	-1.78544885812468
fzd1	-0.637484660716312	6.8893526262483	-3.53516825700965	0.00190708160726724	0.0159455716021541	-1.78584879682426
rela	0.779765407093023	7.94522202283202	3.53452039097323	0.00191002914174477	0.0159594405278175	-1.78734012313915
aldh6a1	0.752034153926193	6.27584006719391	3.53250179320214	0.00191924167217746	0.0160256032546011	-1.79198629976433
stxbp2	-1.4656551362739	5.28896672464479	-3.53144034297189	0.00192410343346327	0.0160553725179081	-1.79442915367383
bin1	0.795352642180894	7.64888735324951	3.52752438317652	0.00194214451118431	0.0161950003245759	-1.80343984611294
npm1	0.648378235109339	9.96808437782199	3.52680940023442	0.00194545636341051	0.0162116999650823	-1.80508475914207
atp5mf	-0.610868833316255	9.53765579875628	-3.52555356126115	0.0019512869244494	0.016249351705082	-1.80797377685193
lrrk1	-0.553637117966059	5.9375047968836	-3.52514680350356	0.00195317907855686	0.0162525309334565	-1.80890945373851
fchsd2	-0.433566185377395	7.27262090047021	-3.52474671503579	0.00195504196532583	0.0162525309334565	-1.80982976210197
paf1	0.590685760367663	6.7311191080435	3.52443328801049	0.00195650255832699	0.0162525309334565	-1.81055070774334
gcom1	0.507796373260851	7.5605300559498	3.52434404175913	0.00195691864829069	0.0162525309334565	-1.81075598919425
hla-dqb1	-1.66700332442712	7.05817339233418	-3.52303718258508	0.00196302153316099	0.0162851075350338	-1.81376183340622
colgalt1	-0.773464916803356	8.49747533336853	-3.52294102064302	0.00196347133568646	0.0162851075350338	-1.81398299959311
plin2	1.04066894449188	7.38414152182712	3.52227160130965	0.00196660538405944	0.0163001837154003	-1.81552257741362
sfswap	0.687795239643488	6.46559029063254	3.51913641645189	0.00198134897208346	0.0164114008838191	-1.82273209596405
nolc1	0.68189669672838	7.40783158885075	3.51751958084988	0.00198899467698035	0.0164637173028394	-1.82644944631728
osbpl8	0.572437337364294	9.00010392618727	3.5158187473744	0.00199706883819188	0.0165195079648163	-1.83035944470296
pdcd1lg2	-1.82877231241009	3.55502404865582	-3.51436084814375	0.0020040153393451	0.0165646371457092	-1.83371057926584
lgals1	-0.698217393786896	11.0014076260602	-3.51411272088579	0.00200519995812147	0.0165646371457092	-1.83428089002108
atxn1	-1.47250949451763	6.74143047528643	-3.51254397201739	0.0020127054594569	0.0166155544696366	-1.83788635617194
epha1	-0.885249588329159	3.91548347738821	-3.51220240073087	0.00201434331906986	0.0166179968821066	-1.83867133643669
rnf170	-0.824490641108707	5.73224753053228	-3.51191492074842	0.00201572282025659	0.0166183060474283	-1.83933199170367
nras	-0.624878804232035	6.550969527346	-3.51090116653206	0.00202059482158398	0.0166368525828664	-1.84166157947049
fam53b	-0.65870674421938	7.8001062540043	-3.51088772963978	0.0020206594754608	0.0166368525828664	-1.84169245601848
klhl29	1.81148375582686	3.78400175192982	3.51007799921779	0.00202455937881705	0.0166578862378017	-1.84355307363314
mcm10	-1.27642574537366	2.98358174754307	-3.50962896242745	0.00202672525593538	0.016664634026725	-1.84458483283385
pkig	0.635489954369422	8.56406496814719	3.50554735527691	0.0020465169373646	0.016816203872187	-1.85396163136342
apol3	-0.612921620603723	8.13733656753914	-3.50384894630553	0.00205480825589083	0.0168731370243344	-1.85786259779422
napg	0.627344260433484	6.15725535054747	3.50132312347226	0.00206719982513652	0.0169636417724755	-1.86366308243665
fcrl2	-0.905390465750632	5.45782469080076	-3.49856390418417	0.0020808201942109	0.0170552855993264	-1.8699983008994
slc39a8	-0.794675846002318	5.41715251831801	-3.49825029722531	0.00208237381516401	0.0170552855993264	-1.87071826515099
c1qtnf1	0.881104058836549	8.54057374426151	3.49822492864576	0.00208249954180583	0.0170552855993264	-1.87077650441184
rad51ap1	-1.59582221187102	4.14846742154203	-3.49695478979042	0.00208880387375214	0.0170956102899358	-1.87369225065601
ngdn	0.692027182438584	6.21454559962534	3.49624763874933	0.00209232192335331	0.0171130927192101	-1.87531547426928
enpp1	1.27894743135854	4.86512617743201	3.49410851852449	0.00210299937444223	0.0171890701344674	-1.88022517138581
fmo1	-1.86976616037924	5.09025169570265	-3.49295000669131	0.00210880438889504	0.0172184958584279	-1.88288384990439
dexi	0.754982549065049	7.29469133489367	3.49283521058128	0.00210938045847009	0.0172184958584279	-1.88314728375656
bcr	0.83173126964832	6.74249149646427	3.48995254379701	0.00212389694101295	0.0173255703692776	-1.88976166871987
mast4	0.942969787054627	5.39629027744094	3.48869781366923	0.00213024604123941	0.0173659227970162	-1.89264024042681
fgf9	-1.31511893558065	3.9290143837483	-3.48664851744948	0.00214065578525605	0.0174393030189643	-1.89734109459111
amotl2	0.691806840993134	7.97402299138346	3.48612836223782	0.00214330592603965	0.0174480656261629	-1.89853415488795
syne1	0.949405422466868	5.69555234720654	3.48588450672203	0.00214454945352661	0.0174480656261629	-1.89909346071005
srsf5	0.833890774760599	8.7418672502219	3.48450220869938	0.00215161178317095	0.0174940306703913	-1.90226369548101
rogdi	-0.665828163372812	6.13174854048931	-3.48259583747229	0.00216138908035059	0.0175619953950009	-1.90663531631804
pgpep1	-0.59276672145291	6.67585636332074	-3.4816472293583	0.00216627046536796	0.0175901161787878	-1.90881039139124
coq10b	0.811671696985101	8.56580871997289	3.47943531955596	0.00217769460845771	0.0176708205844484	-1.91388148963063
znf814	-0.596561687131392	3.55170166554114	-3.47917104656252	0.00217906347673848	0.0176708205844484	-1.9144873129144
lhfpl2	-0.672934521872902	9.32761624688755	-3.47842640334936	0.00218292508042665	0.0176905505699759	-1.91619427748363
tox3	3.45371400812244	3.0865207618771	3.47767379869752	0.00218683478533944	0.0177106443079518	-1.91791939252646
rcan2	0.687642910921502	7.45897466789853	3.4767096271999	0.00219185358715889	0.0177396882155481	-1.92012931293977
sox13	0.915796894005955	6.27631694413446	3.47565687274002	0.00219734638097488	0.0177725279135284	-1.92254208078373
rgs10	-0.610216072187728	6.42001896210261	-3.4752766697658	0.00219933342073732	0.0177769880868082	-1.92341340512662
magea3	1.14909696882776	4.08670595371332	3.47367819501144	0.00220770674674701	0.0178330284702989	-1.92707640400537
serp1	-0.480051824038112	8.8861943453246	-3.47243508018948	0.0022142401683825	0.017874143419218	-1.92992476028763
ccn2	0.7997893230909	10.8323257899802	3.4717316311845	0.00221794566539386	0.0178923916446724	-1.93153645506178
avpi1	0.528564805326864	8.47591618787066	3.46985307125707	0.00222787099552126	0.0179521371174834	-1.93584005146096
apobec3a	-1.70880683688023	4.71597347394392	-3.46955855869179	0.00222943098715024	0.0179521371174834	-1.93651469363669
rnf44	-0.504798281100082	7.71667433242367	-3.46950761224966	0.00222970095184442	0.0179521371174834	-1.93663139546509
pdia6	-0.615224555593496	9.55775783815994	-3.46803830279527	0.00223750060459637	0.0180032293610896	-1.93999690843479
casc3	0.786990991064738	7.92809049937665	3.46733049878981	0.00224126743072676	0.0180218276588893	-1.94161802417033
etf1	0.415369147445462	8.45425511281454	3.46583995826052	0.00224922019053981	0.0180740386888089	-1.94503158294879
slc24a3	-0.931253916276944	5.40381644103964	-3.46181722246724	0.00227082167812134	0.0182357878340963	-1.95424224898957
apbb2	0.549208029980082	5.53887047272367	3.46140447419101	0.00227304953566039	0.018241848606664	-1.95518713391144
cd58	-0.950147663611137	6.15100161361991	-3.4602482243449	0.00227930193568287	0.0182801786719955	-1.95783391751008
rnft2	-0.497717088628045	2.59769125973235	-3.45923171449242	0.00228481260607551	0.0183125142401509	-1.96016062100023
dnajc10	-0.701517811999626	5.93650994033383	-3.45890129152486	0.00228660669300463	0.0183150392493378	-1.96091689040252
kcnab3	-1.26794381863733	5.11821356215808	-3.45787171055337	0.00229220582771628	0.0183480185938013	-1.96327326002416
polr1e	0.461993265197996	7.08903712979659	3.45733028449614	0.00229515563133107	0.018359762391972	-1.96451232766286
uchl3	-0.795999265678256	6.91720019946244	-3.45532783438396	0.00230609773858838	0.0184353830193285	-1.96909452411291
lgr5	1.05526645965399	2.88674271885332	3.45048482119797	0.00233277331742338	0.0186366012836476	-1.9801737457112
skp1	0.417988188098402	9.3501438253239	3.44712335931571	0.00235146581704445	0.0187690721423509	-1.9878611417882
mogs	-0.593452950315695	6.76055325708704	-3.44695850001662	0.00235238633327373	0.0187690721423509	-1.98823810853064
nrgn	-1.57453649659897	5.86423488621191	-3.44329465246555	0.00237293524656134	0.0189126925668418	-1.9966145591022
spast	-0.839211372948877	5.07775726309134	-3.4432048070623	0.00237344135095471	0.0189126925668418	-1.99681993654626
hspb2	1.45380441070533	6.23859699665383	3.44173271551113	0.00238174879270728	0.0189663236569547	-2.00018477549742
pde4b	0.944001657291537	6.3673439722316	3.4414518856547	0.00238333682707591	0.0189663236569547	-2.00082663790875
p3h1	-0.45089710953012	7.65829054570161	-3.44098670903582	0.00238596958448085	0.0189663236569547	-2.00188980964901
sp140l	-0.634720235408694	6.8984056131122	-3.44091428336708	0.002386379747643	0.0189663236569547	-2.00205533655726
gpsm3	-0.780125232366022	6.78501158399625	-3.44057402342133	0.00238830764164629	0.0189663236569547	-2.00283297846188
il7	-1.18061408741495	5.09497000113873	-3.44036437573265	0.00238949625275708	0.0189663236569547	-2.00331210389601
lime1	-1.19121852297463	4.61813335768525	-3.43999111361982	0.00239161391969193	0.0189663236569547	-2.00416513092467
lonrf1	0.779174046295455	6.44885862263845	3.43966060111114	0.00239349058415326	0.0189663236569547	-2.00492043944681
sned1	1.18011968655061	8.33385785958402	3.43932048517471	0.00239542328202776	0.0189663236569547	-2.00569767318946
il16	-0.830276903495483	6.21019514767606	-3.43930906815367	0.00239548818537327	0.0189663236569547	-2.00572376302067
arrb1	-0.68369668514625	5.95217242125079	-3.43732592201075	0.00240678810450642	0.0190436147591712	-2.01025522134953
zmym4	-0.406301140660775	6.72528767281406	-3.43451211587982	0.00242291067080403	0.0191589417858022	-2.01668346931524
tmem30a	-0.569281268095217	8.45885529587594	-3.43036532418208	0.00244686380288128	0.0193360015769489	-2.02615427934425
azi2	0.645714000958552	6.65555330649506	3.42947857493489	0.00245201592811295	0.0193643579322849	-2.02817909781638
ifit3	-0.621818397728053	7.7274084326424	-3.42809560566426	0.00246007234695928	0.0194084478655836	-2.03133669893943
pde9a	0.992111667341768	2.60948423270954	3.42798230556767	0.00246073351764243	0.0194084478655836	-2.0315953702558
cd244	-1.08870508120673	4.28021290218855	-3.4253728207001	0.0024760095522649	0.0195165030462738	-2.03755232122884
dffb	-1.70644911093001	4.28226665413694	-3.42245771191914	0.00249318444011561	0.0196393784490786	-2.04420543359046
vezf1	0.51651066704682	7.57142121470564	3.42205279342531	0.00249557928943693	0.0196443709994592	-2.04512944635557
trim29	0.736218232449893	4.74482008109846	3.42181427552447	0.00249699103231437	0.0196443709994592	-2.04567372305556
amy1a	0.777683546062095	5.2395174683317	3.42053997438831	0.00250454662807112	0.0196913021558125	-2.04858138260156
cubn	0.816003657563782	4.58012982582987	3.41937496280559	0.00251147378806075	0.0197257782191916	-2.05123939920557
lhfpl6	0.685446978877172	9.3270671572105	3.41926684587301	0.00251211760087743	0.0197257782191916	-2.05148605887964
rab17	0.998621953209399	4.66329109760924	3.41863456206789	0.00251588594705209	0.0197428489748708	-2.05292851663953
adnp2	0.705388609753822	7.01820040716383	3.4181817299978	0.00251858817655148	0.0197515372959069	-2.05396153629862
bicd2	-0.635536688752149	6.63656437679298	-3.41556024145705	0.00253428751580826	0.0198620774102872	-2.05994101957934
cnnm4	-0.935748892244808	4.90126898224677	-3.41504983340875	0.00253735531417528	0.0198735426030566	-2.06110508223892
ran	0.648736595436279	8.77664283951165	3.41420171544035	0.00254246094467539	0.0199009442970388	-2.06303923338453
slamf1	-1.29673413924013	6.18161081929418	-3.41275572875813	0.00255118889206128	0.0199566469048609	-2.06633651985129
tnfrsf10d	1.59692820339887	3.14694599803867	3.41191818435534	0.0025562576865381	0.0199800101539044	-2.06824619109156
srbd1	-0.572131121515864	6.69008051073706	-3.41172923295818	0.00255740257562291	0.0199800101539044	-2.0686769974913
pcna	-0.855274222008337	7.56044436375554	-3.41106578938796	0.00256142646690319	0.0199988297223595	-2.07018958484636
recql	-0.499139329592069	7.24379517143148	-3.40978462842567	0.00256921444056206	0.0200469958522243	-2.07311026929127
btf3	0.440951138284671	10.5994125823441	3.40909067395738	0.00257344254130927	0.0200673419326402	-2.07469215748391
ndrg2	0.887925331738152	6.35169920724789	3.40114987197642	0.00262231089415045	0.0204355417257804	-2.09278682332826
chst7	2.08351482542083	5.26866133295855	3.39851725476807	0.00263871157276399	0.0205504184940481	-2.09878306011307
p3h2	-0.994020105457186	3.93574418343273	-3.39672443267729	0.00264993783531406	0.0206248775705179	-2.10286574782832
pex11b	-0.603942390041981	7.7108196133884	-3.39502495539504	0.0026606226813547	0.0206902297653483	-2.10673528822984
ubc	0.410138940190711	12.3917103435876	3.39485775419136	0.00266167617024953	0.0206902297653483	-2.10711595823213
peg3	0.98447670552188	4.3958369238304	3.39322437679797	0.00267198909825786	0.0207456136132833	-2.11083441051068
kat6b	0.578063276437319	7.14564698326801	3.39319868310442	0.00267215163637138	0.0207456136132833	-2.11089289911308
cxcr4	-1.18948085293937	9.22527105756264	-3.38928702627995	0.00269700977631817	0.0209254837469599	-2.11979580516689
rexo2	0.709103623095992	9.78144285418858	3.38754431361701	0.00270815714031872	0.0209988164486955	-2.12376123982159
hmmr	-0.67343539979683	4.97283938557016	-3.38703850336093	0.00271140100544153	0.0210108126723294	-2.12491206768967
ifnar1	-0.556214890600712	5.79725662124149	-3.38665534051453	0.00271386083419868	0.0210167221450171	-2.12578381255781
chd1	0.821129498439179	7.42921911467431	3.38610934567822	0.00271736977891858	0.021030743732718	-2.12702597114788
gnal	0.563579847862321	4.71153712624374	3.38184415470776	0.00274493384791612	0.0212226347262375	-2.13672741116284
akr1b1	0.826238085041764	9.93759872076562	3.38149052813918	0.00274723140435136	0.0212226347262375	-2.1375315948502
igflr1	-0.759086297062827	6.86646758049162	-3.381423830252	0.00274766495945065	0.0212226347262375	-2.13768327001838
rbm4b	-0.540571266875123	6.73704885167461	-3.38121554405769	0.00274901930880117	0.0212226347262375	-2.13815692017117
rrn3	0.867140228704057	6.77391979075554	3.37999963179819	0.00275693861724562	0.0212705114625249	-2.14092177559225
crtap	0.689257423074827	7.99083886948531	3.37928319824683	0.00276161521948518	0.0212933258174875	-2.14255073187269
arhgef38	0.752977657336072	6.20478887361327	3.37804889949094	0.00276969042580628	0.0213423002755191	-2.14535691966039
kcnj6	-1.40748586450573	4.19934611875548	-3.3771360696412	0.00277567730185211	0.0213751318587281	-2.1474320501836
tex13a	-1.11839192385172	2.52440174979298	-3.37563185133208	0.00278557043567546	0.0214379855220443	-2.15085121785205
tmem127	-1.14433034254517	7.49770896363994	-3.37246104693961	0.00280653751350855	0.0215859341799853	-2.15805714209783
serpinb10	-1.43002482245785	5.40648096652788	-3.36986309224337	0.00282383138823373	0.0216954032653439	-2.16395971433246
pf4v1	-1.46450181533309	2.73675737040201	-3.36979674348363	0.00282427441361014	0.0216954032653439	-2.16411044144794
dclre1a	-1.3898013525245	4.48362511492041	-3.36784088870749	0.00283736461796514	0.0217824464130579	-2.16855323653783
ift122	0.701284358646488	5.58091093575456	3.36743373990265	0.00284009703531817	0.0217899142430885	-2.16947799292592
ccne1	-1.22515774551018	4.48015376429562	-3.36670220341436	0.00284501290753384	0.021814114448292	-2.17113944651756
dab2	-0.531309684715733	10.2165916183603	-3.36636578240572	0.00284727641991468	0.0218179603389873	-2.17190348411018
pcdhb6	1.148733901798	4.59963073083907	3.36526856057793	0.00285467098680654	0.0218610951327306	-2.17439519916449
mical2	-0.729710267577691	6.03796458755343	-3.3631311267685	0.00286912978134931	0.0219456079126197	-2.17924846483185
phf11	-0.582707793431288	8.57502191543669	-3.36286527841621	0.00287093311892045	0.0219456079126197	-2.17985203647206
mob1a	-0.750645620347043	7.5441895819166	-3.36285194897653	0.00287102356605378	0.0219456079126197	-2.17988229873044
tcof1	0.566717408338709	5.90260822021091	3.36126268423473	0.00288182750750131	0.0220126440882259	-2.18349019966079
snx11	-0.534496820016381	6.86027731766388	-3.36103936247987	0.00288334884204978	0.0220126440882259	-2.18399713690637
cd82	-0.658104369190758	7.30503058608362	-3.35963161406397	0.00289295690597759	0.0220723877798648	-2.18719247276361
phlpp1	0.816709089222101	3.16506359061896	3.35640147229366	0.00291512130019105	0.022216407581302	-2.19452278925019
zmat3	-0.749643799578824	6.97018818419155	-3.35623552972241	0.00291626441956251	0.022216407581302	-2.19489931327022
irak4	-0.60891677320949	6.19727210423079	-3.35595953412943	0.0029181666239699	0.022216407581302	-2.19552553535941
pdia3	-0.6239388733417	10.1134089239309	-3.35583728945679	0.00291900954007739	0.022216407581302	-2.1958028982744
tuft1	0.650779691069777	7.20581208982853	3.35506301732501	0.00292435391508229	0.0222434118737494	-2.19755958592033
ackr1	1.65364040963758	9.18703173870218	3.35474960088682	0.00292651997035448	0.0222462227089623	-2.1982706379963
ttk	-0.917359652202951	3.98849569981351	-3.35383191171802	0.00293287122777852	0.0222808247936082	-2.20035249615795
parva	0.641815584031528	6.93389466293856	3.35305647827207	0.00293824842686655	0.0223011149964068	-2.20211150037402
tcaf1	0.418813395612165	6.67844577139691	3.35292746983486	0.00293914396140966	0.0223011149964068	-2.20240413298899
nfyb	0.529429088700319	6.02557493179203	3.34791559405634	0.00297414167006284	0.0225447260816292	-2.21377003364585
il5ra	-0.778972496415417	3.75578423277557	-3.34768750445388	0.00297574404524047	0.0225447260816292	-2.21428717088401
asmt	0.694852094944654	2.15137035966106	3.3475497511596	0.00297671219764707	0.0225447260816292	-2.21459948750266
hoxd9	0.527930237621955	3.77960397802975	3.34543745492233	0.0029915962957031	0.0226425653017471	-2.21938803124945
tfec	-1.02511038163088	6.83550650050209	-3.34503643562521	0.00299443022935316	0.0226425653017471	-2.22029703187441
traf3ip2	0.935846788707305	6.13278987046836	3.34493137822954	0.00299517308449527	0.0226425653017471	-2.22053516264555
ano1	-1.02248593258424	5.74733959577691	-3.34468095148535	0.00299694456347925	0.0226425653017471	-2.22110278900184
ar	0.787741077184101	5.61963236159977	3.34291570704013	0.00300946064772331	0.0227232629272913	-2.22510358800955
spag4	-1.68521267567556	5.27583449425906	-3.34118376105347	0.00302179018247766	0.0228024544970267	-2.22902829084988
ryk	0.409666195061954	7.17441307078699	3.34023900783759	0.00302853653124136	0.0228388475015117	-2.23116890093979
saa4	1.71040211970047	4.63474539569974	3.33999214824933	0.00303030173988401	0.0228388475015117	-2.23172820176171
eif3a	0.461996151615413	7.81098149644309	3.33767995443668	0.00304688423864998	0.022949858593189	-2.23696623989493
ece1	0.764438163610763	6.16513378098785	3.33729823756366	0.0030496303179241	0.0229565788613095	-2.23783087325555
cd3g	-1.22122623632613	3.63324337717479	-3.33703286299345	0.00305154085033155	0.0229570050726948	-2.23843195978948
zmynd11	0.465693145799471	7.92162511848876	3.33665390832093	0.00305427111272212	0.0229635939215774	-2.23929028540819
zfand6	0.579494728387014	6.56586485080987	3.33309138742004	0.0030800548140713	0.0231399585868263	-2.24735786528925
cdc20	-1.70716339530504	3.5853927164381	-3.33289726453099	0.00308146585719749	0.0231399585868263	-2.24779739396879
adra2a	1.26756334524168	6.89881173236402	3.33214294174527	0.00308695487472577	0.0231671286143813	-2.24950523968055
hspb8	1.01087551807608	8.21488733787531	3.33162160009612	0.00309075411723618	0.0231815919041403	-2.2506855281664
krr1	0.621075707752228	6.42613196191114	3.32997129984026	0.00310281065175767	0.0232579323854209	-2.2544213399399
abl1	0.769220905836089	8.9279751481486	3.32581982123883	0.0031333430571864	0.0234640372677882	-2.26381657611906
gfra1	0.886163633739128	4.06812595954728	3.32558071221833	0.00313511049721765	0.0234640372677882	-2.26435759448454
spi1	-1.28523085562572	5.60428199893971	-3.32546158602312	0.00313599141388915	0.0234640372677882	-2.26462713003603
btg3	0.514964739881419	7.14002881394611	3.32150439800947	0.00316539162183994	0.0236697128340846	-2.27357897794937
lamb2	0.718609338001695	7.90717162779701	3.31881347278992	0.00318553731313346	0.0238059798120287	-2.27966442197933
nlrp3	-1.04553537813083	3.05418335505694	-3.31802329632349	0.00319147668850931	0.0238359805994033	-2.2814510890955
tm6sf1	-0.694468325172581	7.19185806659947	-3.31752190807399	0.00319525097702102	0.0238497847187772	-2.28258470854246
vnn2	-1.81882610763643	4.23905308131331	-3.31672669770486	0.00320124598516953	0.0238801379725026	-2.28438253856379
chmp1b	0.544973210561404	7.69088899395299	3.31642956951674	0.00320348881535859	0.0238810452436527	-2.28505425824566
fer	1.09953019941406	5.14363701224024	3.31619974299722	0.00320522467858764	0.0238810452436527	-2.2855738156754
ank2	0.653071024651868	6.27799000568453	3.31162525193357	0.00323996677180597	0.0241223992467072	-2.29591279216509
rpl13a	0.343567550848217	12.8567028636549	3.31142259433029	0.0032415143621514	0.0241223992467072	-2.29637072245232
tmem262	0.814700233013928	2.47033804341501	3.31060240450331	0.00324778508274888	0.0241435736676567	-2.2982239542881
znf223	-0.521885064192711	5.66278054282653	-3.31054045366292	0.00324825920458015	0.0241435736676567	-2.29836392732234
odc1	0.673268281371419	8.77070967968574	3.30757980111404	0.00327099643653542	0.0242979897262256	-2.30505232624486
tpk1	-0.582846753627687	7.17625019538041	-3.30699613771447	0.00327549711718706	0.0243168350132658	-2.30637065537787
gask1b	-2.07498291979167	5.57735724838499	-3.30642225721647	0.00327992824231811	0.024335141656456	-2.30766681612831
snx5	-0.472987393992843	8.12570365099503	-3.30503829683342	0.00329063830170618	0.0243956868677339	-2.310792322891
arhgap4	-1.40541653050017	4.6757835556211	-3.3048589363794	0.0032920288101416	0.0243956868677339	-2.31119735646168
rita1	-0.721045276365248	4.22966724738242	-3.30228740327864	0.00331202789241868	0.0245292113587443	-2.31700365334567
atp6v1a	-0.67703272346739	7.97239550396645	-3.30096890982819	0.00332232779365744	0.0245907860543097	-2.31998014088313
znf574	1.03182653715426	3.59446257788534	3.29887380473986	0.0033387586842784	0.0246856802525731	-2.32470904636576
nox4	0.921789839196016	7.17301444665088	3.29882587964577	0.00333913546176693	0.0246856802525731	-2.32481720793817
sec23ip	-0.653848075340501	5.9328897719396	-3.29825282589512	0.00334364390436452	0.0247042616156002	-2.32611048740105
ulk1	0.851472727526305	5.94207514142232	3.29798894919763	0.00334572192038177	0.0247048745021392	-2.32670598571991
casp3	-0.693240179150533	6.94723729837496	-3.29681629701044	0.00335497172081002	0.0247484372693899	-2.32935216106635
nrp1	-0.733019307814176	5.75617430880357	-3.29673439536471	0.00335561868491526	0.0247484372693899	-2.3295369669219
heatr3	-1.12114397708736	5.58874074600392	-3.29492343461817	0.00336995505208711	0.0248393770297587	-2.33362291087557
ttll1	-1.1849030416214	4.89805076950109	-3.29391850195041	0.00337793625511168	0.0248833936032409	-2.33588996119243
celsr1	-0.725147216416176	2.17024379767187	-3.29188148891169	0.00339417076937919	0.0249881192849123	-2.34048462733535
atp5f1c	-0.385620853854801	8.79320723513451	-3.28928353744433	0.0034149860795	0.0251264246122689	-2.34634322112967
klf6	0.924673345934177	8.1380612104501	3.28902778537926	0.00341704192269539	0.0251266212165896	-2.34691988291629
skap1	-0.516268761167703	6.91718791197126	-3.28716992065469	0.00343201243058081	0.0252217269601674	-2.35110850664576
sf3a1	0.374573244338523	8.03144933083637	3.28678290074293	0.00343513902771309	0.0252297310677172	-2.35198096152906
memo1	-0.538334916338183	7.46103665847026	-3.28644603310046	0.00343786271911878	0.025234768257764	-2.35274033182283
tpst2	-0.813633251022154	7.52832944370434	-3.28475210164882	0.0034515906326726	0.0253205253580478	-2.35655842921657
macrod1	1.05112738682214	5.60573750605854	3.28397649118837	0.00345789410774447	0.0253446086978128	-2.35830643278501
dhcr24	0.90132589117855	7.23192634994311	3.28384461096802	0.00345896702732	0.0253446086978128	-2.35860363976489
vasp	-0.56031221104221	7.52216315455603	-3.28215457297156	0.00347274514751983	0.025430516358213	-2.36241199094898
dhrs3	0.762971772966607	7.76870338736327	3.2817900602159	0.0034757238509907	0.0254372863160862	-2.36323330534813
erp29	-0.529393864717575	9.30234208108527	-3.28116982875097	0.00348079793697915	0.0254560347359474	-2.36463073347146
cenpm	-1.18562805433184	3.07248041152425	-3.28097454162482	0.00348239706393401	0.0254560347359474	-2.36507071240391
gnai2	-0.780802346291274	8.43734929903735	-3.2790007985674	0.00349859942378743	0.0255593844629851	-2.36951705076172
tulp3	0.780031196698117	6.66756003744741	3.27405278537168	0.00353954053215748	0.0258432372698739	-2.38065985106125
tox	-0.635580281105082	4.26441119751693	-3.27237609402497	0.00355351934853476	0.025930011840251	-2.3844344786819
sptbn1	0.521082455644448	5.58315327796107	3.27173421827296	0.00355888496219486	0.0259538707225318	-2.38587932596297
calcoco2	0.687775100762181	9.09864683477005	3.27128468956892	0.00356264738646973	0.0259660168255766	-2.38689114963368
cadm3	-0.757721733988156	5.71906710991999	-3.27033922008698	0.00357057332225887	0.0260084761467833	-2.38901911607221
pik3r1	0.961129210936011	7.8288282621005	3.27006032802844	0.00357291456787469	0.0260102299200425	-2.38964677965186
pvr	0.512165818010272	4.81829182539963	3.26756794056139	0.00359390409622424	0.0261476582982049	-2.39525527449701
armt1	-0.897572312500682	6.51532099395752	-3.26719092543015	0.00359708953744391	0.0261554666718543	-2.39610353125658
cox7a1	0.653528361234034	8.21590357620143	3.26655520920065	0.00360246699215281	0.0261791952839368	-2.39753377434864
acss3	0.499622322999295	6.57849832426287	3.2659013096682	0.00360800641472501	0.026204072395038	-2.39900483157752
ttc3	-0.763920758293308	7.66171965072544	-3.26563325383143	0.00361027960727245	0.0262052124131622	-2.39960784054031
gsto1	-0.436582760877732	10.1609236359176	-3.26449325869022	0.00361996267046425	0.0262601041290913	-2.40217215254553
trim13	0.430175479599532	7.31393837530195	3.26412654000269	0.00362308292701601	0.026267351220866	-2.40299698948782
npy4r	1.11157629227249	3.08468263116095	3.26302970394269	0.00363243106705309	0.0263197155665994	-2.40546385166853
esyt1	-0.781408273081851	7.37332337117988	-3.26185128252414	0.00364250068226627	0.0263772432447387	-2.40811390222379
atp5if1	-0.733794995589061	7.73069334421523	-3.25927636902311	0.00366459787381498	0.0265217507138813	-2.41390331005549
c16orf70	0.700010909328356	1.81365082977281	3.25889832943556	0.00366785305817584	0.0265298039832894	-2.41475316369239
sqor	-0.640396360861908	8.96191499637674	-3.25730384960591	0.0036816136040289	0.0266137894096263	-2.41833728443326
ifih1	-0.903948551987587	4.05844001672114	-3.25658341942854	0.00368784745053113	0.0266358774673019	-2.41995650004279
bid	-0.583040334832835	6.79497676232287	-3.25645368123934	0.00368897115855793	0.0266358774673019	-2.42024808286661
trib1	0.982345475752695	9.2909168280846	3.2554843497405	0.0036973774204864	0.026681016665433	-2.42242650612615
spag9	0.458512426791002	6.92328340309761	3.25486796116051	0.00370273256485683	0.026704098631696	-2.42381163325272
focad	-0.581373709152836	6.59457588768967	-3.25326331328359	0.00371670903252009	0.0267892944992411	-2.42741713632683
coq8a	0.534439445992051	7.51994710662687	3.25098399220744	0.00373665009269813	0.0269016969499349	-2.43253756032271
spp1	-1.87054504980414	8.44182638091471	-3.25087488962228	0.0037376072003263	0.0269016969499349	-2.43278262610279
c11orf24	-0.637156664602034	7.23442622692636	-3.25013243468534	0.00374412675295337	0.0269016969499349	-2.43445025298881
septin10	0.526969896565045	7.57362981108922	3.24997486955989	0.00374551176531611	0.0269016969499349	-2.43480414353893
cald1	0.493432364687493	6.9097620126281	3.24983322363734	0.00374675727142607	0.0269016969499349	-2.4351222747786
hnrnpa3	0.448619213926285	8.12729981761455	3.24958469918009	0.00374894354355028	0.0269016969499349	-2.43568043994854
ube2d3	0.390514258029649	9.59878966977856	3.24939430033077	0.00375061932293345	0.0269016969499349	-2.43610805028438
rpl23	0.896441777031118	7.5600552705656	3.24929037572621	0.00375153431369062	0.0269016969499349	-2.43634144753377
sox17	0.974360767915433	6.49220086351582	3.24925386478109	0.0037518558210884	0.0269016969499349	-2.43642344441152
pdlim2	-0.567967507973438	6.89621163819169	-3.24826406720537	0.00376058197303103	0.0269486612106732	-2.43864623153548
rpl24	0.474060146946295	11.6141873584224	3.24695347577414	0.0037721666310606	0.0270160436046405	-2.4415890790779
rab15	-0.807289504361091	4.8631692245055	-3.2458679118996	0.00378178846726648	0.0270692986070294	-2.44402634311567
hoxc10	1.05694998884557	7.6882723989507	3.24537135765746	0.0037861975949453	0.0270798825334801	-2.445141096249
cep152	-0.881903115989537	3.37461341675119	-3.24520894179367	0.00378764084212126	0.0270798825334801	-2.44550570390488
map3k12	0.846595063956064	5.29312640143887	3.24384438653184	0.00379978757974625	0.0271447776277763	-2.44856875648079
hist2h2be	0.478655503869869	6.9469179411104	3.24369699483537	0.0038011018659908	0.0271447776277763	-2.44889958476956
zcchc8	0.596666054562426	7.96423801619739	3.24093632534197	0.00382580042974427	0.0273011743960346	-2.4550951240047
morc4	0.609880176283151	7.17304902813914	3.24075683160898	0.00382741167338417	0.0273011743960346	-2.4554978857953
dis3	0.488263574874222	6.01894640535515	3.23998363607096	0.00383435988168928	0.0273349904519047	-2.45723275599463
acp5	-1.12621666698008	8.73059984601584	-3.23888394029861	0.00384426325112908	0.0273898226920204	-2.459699978098
igsf6	-0.728079216323078	6.90760512467629	-3.23843454547192	0.00384831744923625	0.0273900360534132	-2.46070813708732
rnasel	-1.00575875656543	5.30788172872512	-3.2383902803652	0.00384871700984729	0.0273900360534132	-2.46080743757891
cd7	-1.25950281558097	3.15865555514165	-3.23688907296816	0.00386229160043223	0.0274708540425918	-2.464174846666
slc25a1	0.918057142026561	7.02725257811944	3.2363057253002	0.0038675790308289	0.0274866721337149	-2.46548323242535
slc2a4	0.87872376475327	2.75625410419583	3.23615404754325	0.00386895498094687	0.0274866721337149	-2.46582341628923
heg1	-0.669731645102549	8.19620429027977	-3.23557927786442	0.00387417334092619	0.0274956687198781	-2.46711246496177
sgce	0.85867591002874	7.27278836104787	3.23552547257742	0.00387466219140654	0.0274956687198781	-2.46723313133817
faxdc2	0.925985633443857	7.9420678560783	3.23281960834608	0.00389932387696351	0.0276548267860476	-2.47330056630783
matk	-1.17611792283482	4.29067904540165	-3.23161440810859	0.00391035728319518	0.0277060984105894	-2.47600247123789
lat2	-0.841834133531748	6.56297939902643	-3.23154124833138	0.00391102802404186	0.0277060984105894	-2.47616647519736
cldn11	1.36713164536497	5.02081923456587	3.23129363665922	0.00391329899773477	0.027706335899914	-2.47672154271969
mcf2l	1.00184172599191	4.93374104310551	3.2305317293765	0.00392029487688407	0.0277400065488317	-2.47842940948429
prg4	0.994061695411082	11.4593531647934	3.22929259789212	0.00393169860739954	0.0278048108825977	-2.48120671680951
cda	1.50466764440761	3.90348502875298	3.22806000005276	0.00394307416797934	0.0278693421358951	-2.48396902357714
mzf1	0.692483520473512	5.99569922217485	3.22715196124123	0.00395147483570446	0.0279127854481052	-2.48600375137914
mgat2	-0.403459015032461	6.02061853443754	-3.22586972201596	0.00396336700243096	0.0279808287292489	-2.48887665579688
man1a1	1.04018312924826	8.76480162062077	3.22491557893833	0.00397223877673228	0.0280274830611258	-2.49101419813228
map3k8	0.960902714910485	6.78965348829164	3.22424007780394	0.00397853134930555	0.0280558961836279	-2.49252737667441
abcb9	0.643416639773774	2.93131445789877	3.22288954806794	0.00399114112582082	0.0281287994086734	-2.49555235334564
usp47	0.582002731035321	8.19683786257421	3.22251047868342	0.00399468743197241	0.0281377784244109	-2.49640133264557
bet1	-0.710064517632695	7.37333864917062	-3.22186264899084	0.00400075515351982	0.02816449747927	-2.49785216013354
gramd1c	-1.36346015849892	2.29342614338653	-3.22092290058206	0.00400957296047809	0.0281960821649646	-2.49995656947279
cnr1	0.674314443660965	4.45779978898782	3.22089918370808	0.00400979574355993	0.0281960821649646	-2.50000967674825
kat8	0.379367467584371	6.72286841280608	3.21688564175385	0.00404767031447319	0.0284462551101711	-2.50899496125875
atp2c1	-0.644327435216582	6.11993384800239	-3.21654542669625	0.00405089673924883	0.0284527818049451	-2.50975643964504
ncl	0.658330822493241	10.5360303829496	3.21594408079234	0.00405660570173493	0.0284767281205122	-2.5111023209045
smim27	-0.641825168085304	5.67541610445476	-3.21563525062758	0.00405954065914425	0.0284811852590273	-2.51179348497404
bank1	-1.58491112506277	5.51792017518333	-3.2133744115602	0.00408108933097774	0.0286161546916746	-2.51685256880048
ptprh	0.878132411753189	4.92414226879773	3.21291442888846	0.00408548712238001	0.0286307793075448	-2.51788172413028
pla2g2e	1.27428137902092	4.11092493031771	3.21177380104467	0.00409641226291379	0.0286911046672294	-2.52043352302837
znf671	-1.56447072932285	4.33346338703116	-3.2114661641491	0.00409936371647427	0.0286955460153199	-2.52112171153087
cttn	0.562251699938862	5.85003546251197	3.21109710755553	0.00410290715065158	0.0287041238680895	-2.5219472670886
tfb1m	-0.494846685797103	6.18458077650266	-3.20984649054897	0.00411493685386267	0.0287720288319488	-2.52474457431628
ifng	-0.589490980646196	5.38634130601141	-3.20762085000896	0.00413643003283725	0.0288990901547696	-2.52972183354852
gcdh	0.765882542867191	6.17596913957338	3.20748179203287	0.00413777653592882	0.0288990901547696	-2.53003277329365
jade1	0.928531758702771	7.37965045333274	3.20683845684889	0.00414401150966298	0.0289130947250073	-2.53147123879958
agap2	-0.743649674590585	3.95165031892771	-3.20661376536076	0.00414619128614612	0.0289130947250073	-2.53197361445433
tacstd2	0.674765994361526	4.0183556290127	3.20655243890716	0.00414678641941475	0.0289130947250073	-2.53211072888434
sec23b	-0.524195727330812	7.08930055106178	-3.20577603140172	0.00415432811921927	0.0289493782218865	-2.53384655230143
il1b	0.872055348022582	6.85793448583043	3.20518231177377	0.00416010424268535	0.028963197238278	-2.53517384078064
shox2	0.992958019938864	4.72627415314884	3.20509143033525	0.00416098908882311	0.028963197238278	-2.53537700310031
vps8	-0.522622472979573	6.77338168612145	-3.20465521854108	0.00416523870646848	0.0289764892708985	-2.53635211193261
eif1ay	2.72594305490929	3.35045172996259	3.20433762288308	0.00416833540290005	0.0289817503055089	-2.53706203725915
akap13	0.506365659998748	7.42062578319865	3.20311764448166	0.004180251508111	0.0290482909230856	-2.53978884416394
ube2l3	-0.50150349710978	7.8163740428745	-3.20025868496024	0.00420830592790958	0.0292221194817586	-2.54617758005526
slc25a4	0.643592730886688	5.33027575890796	3.20008802303398	0.00420998636481123	0.0292221194817586	-2.54655888519697
hp	1.8136872867681	3.88343823950517	3.1965211117318	0.00424525758946843	0.0294351906066118	-2.55452672579392
retreg1	1.16074460787849	6.13880151712486	3.19650300890995	0.00424543732725581	0.0294351906066118	-2.55456715641098
bckdha	0.438382747241144	7.21351968769405	3.19277628627883	0.00428259647732888	0.0296762127469298	-2.5628886817113
srek1	0.55231359343084	8.37952828461022	3.19068419881995	0.00430359471003891	0.0297889184730691	-2.56755869710408
psmc1	0.419345936995475	9.58799963526232	3.1906100658353	0.00430434060962537	0.0297889184730691	-2.56772415926847
pimreg	-0.793730341160903	5.70141210098468	-3.19043743794786	0.00430607801556922	0.0297889184730691	-2.56810945334048
rps23	0.327548724580337	12.7353235461292	3.18985875450855	0.00431190711198128	0.0298125883683217	-2.56940098371975
efs	0.563526967814004	6.47238227153822	3.18861331584789	0.00432447841918848	0.029867601576376	-2.57218033005614
bgn	-1.08497838123629	8.69851082691463	-3.18853377004544	0.00432528255111721	0.029867601576376	-2.57235783324362
adpgk	-0.49419719711498	9.06906513914381	-3.18809398898989	0.00432973093380418	0.029867601576376	-2.57333915872722
bmp4	1.27031871242322	3.4972506909006	3.1878986393444	0.00433170831675667	0.029867601576376	-2.57377504591564
pcyox1l	-0.610789705868265	6.42177478646122	-3.1877061265684	0.00433365784071207	0.029867601576376	-2.57420459403311
hectd3	-0.645158823168031	7.2728491332782	-3.18763920013334	0.00433433578557277	0.029867601576376	-2.57435392290762
sorbs3	0.758488108301234	6.83689099070894	3.1868642875572	0.00434219291086544	0.0299051027893475	-2.57608285844186
cpe	0.813233329598555	7.10784885047496	3.18637466913624	0.00434716445015792	0.0299227000479741	-2.57717518821234
naalad2	1.8893987943507	2.60116376941801	3.18013228514214	0.00441103470323053	0.0303247985483959	-2.59109668653592
fn3k	-0.853807164514201	3.80967670732731	-3.18001313007484	0.00441226266672095	0.0303247985483959	-2.59136232803615
samhd1	-0.74711281909578	7.72227769895901	-3.17994858653043	0.00441292796448433	0.0303247985483959	-2.59150621843514
tcf7	-0.745048223866049	5.83321910341076	-3.17901788052986	0.00442253225168297	0.0303739416930617	-2.59358097745095
copb1	-0.440045655649307	9.50209224100079	-3.17785728990219	0.00443453718585398	0.0304395088538968	-2.59616790359591
slc31a2	-1.02786338706219	7.8716072860543	-3.17723200495113	0.00444101810248962	0.0304671064615673	-2.59756150975272
desi1	-0.583470499332386	6.79114753336558	-3.1765633223801	0.00444795898096869	0.0304978272764869	-2.59905173177939
pc	1.44896082980222	5.4097456238993	3.17606163007317	0.00445317341347088	0.0305166831095794	-2.60016972781444
antxr1	-1.15460076501134	3.87530870844376	-3.17553070365853	0.00445869814781345	0.0305376433431272	-2.60135280287625
pitrm1	0.632344054925137	7.8278814813069	3.17503087991214	0.00446390530223348	0.0305544338669672	-2.60246650751489
rap2b	-0.643943852570304	5.6705019924701	-3.1748218637611	0.00446608457556413	0.0305544338669672	-2.60293221788661
fastkd3	-0.602590789581769	5.85318858928934	-3.1730432433555	0.0044846708351359	0.0306646487860231	-2.60689473727611
ankrd11	0.761413313871836	6.25000752036707	3.17144665056051	0.00450141875771163	0.0307497745659922	-2.61045105691768
c3ar1	-1.2008284611199	9.47002656681676	-3.17138308158066	0.00450208683583493	0.0307497745659922	-2.61059264011751
trak2	0.432854077273256	7.86746732483478	3.16950608062729	0.00452185652765613	0.0308530869561103	-2.614772714334
ap5m1	-0.548334330938054	7.4956336685427	-3.1694739213209	0.00452219598040379	0.0308530869561103	-2.61484432536331
psen2	-0.57928262984048	5.23314197430588	-3.16855687173678	0.00453188615607187	0.0308880244401775	-2.61688626565803
magea8	0.637927278687672	4.32471629951169	3.1685172184651	0.00453230561316341	0.0308880244401775	-2.61697455454351
dmtf1	-0.480633837027122	7.68061626003513	-3.16813330482456	0.00453636864328225	0.0308987089712674	-2.61782932650933
wasf1	0.714545257514759	6.09523723801749	3.16722301342629	0.00454601653493492	0.0309474011831221	-2.6198559157588
timm8b	-0.555489272281427	9.22769094745421	-3.16662907533433	0.00455232221008717	0.03097329996017	-2.62117809373
ddx3y	2.77985817233045	5.37417778015263	3.16605002267406	0.00455847800709595	0.0309981511048156	-2.6224670502549
mnat1	1.30544083014465	3.98441210221055	3.16349692203883	0.00458571581020762	0.0311662562446767	-2.62814918931769
col4a5	1.16698967733073	4.85487021722196	3.16293412941836	0.00459174114395002	0.0311900880886084	-2.62940151222646
mpst	0.668193173330452	7.48844108655804	3.15752359618844	0.00465005958952188	0.0315689078382947	-2.64143694933687
pcdhb12	1.08620396467623	4.54299615393971	3.15687646912756	0.00465708260888153	0.0315992624360438	-2.64287595595372
rheb	0.72512510458504	5.99689460130101	3.15648523816631	0.00466133346742015	0.0316025337789842	-2.64374587916862
slc15a2	-1.05276132259232	4.70185430593469	-3.15636240026004	0.00466266891821078	0.0316025337789842	-2.64401900794981
ddx1	0.581974185563258	8.5225929143682	3.15357877958665	0.00469303097427684	0.031788411810817	-2.65020733916591
rraga	0.414202830276034	9.3772668513472	3.15335568297339	0.00469547264611016	0.031788411810817	-2.65070322574327
hmgn1	-0.618817517442961	9.37479666024016	-3.15314360648251	0.00469779484888921	0.031788411810817	-2.65117460575616
fbxw12	0.71435570311566	7.44322567318462	3.15244434141395	0.00470545956639664	0.0318080912149727	-2.65272877377322
kcnh6	-0.857255820233447	2.16769117599411	-3.15235901405135	0.00470639567691763	0.0318080912149727	-2.65291841164659
sobp	0.714100171457308	7.95546704464693	3.15217553463592	0.00470840920593111	0.0318080912149727	-2.65332618370197
manf	-0.570760029173659	8.70955539489809	-3.15088685119214	0.00472257491702497	0.0318695634617591	-2.65618996577537
cacnb3	0.850149925462196	5.20268700319499	3.15087948785488	0.00472265597612275	0.0318695634617591	-2.65620632777395
mepe	-0.775400453376648	3.22647059948244	-3.14924354679065	0.00474069861845993	0.031973894876029	-2.65984119557143
clec5a	-0.844924941002965	5.96854852556932	-3.14596497364989	0.00477705876283385	0.0322015888188196	-2.66712375318965
unc5c	1.20887189238187	4.0557079049512	3.14572953432956	0.00477968020215679	0.0322017301106135	-2.66764661955848
pdk4	3.03368118643877	6.57562957915324	3.1454130339018	0.0047832063896908	0.032207963416825	-2.66834948514081
thoc5	0.733986273665419	5.03570900691775	3.14515301188197	0.00478610522500996	0.0322099679354882	-2.66892690770437
mxra7	0.520655513425904	10.7160174790248	3.14436908253604	0.00479485509440366	0.0322513257110269	-2.67066765024247
gulp1	0.867255970694553	5.92295354427571	3.14405154098677	0.00479840375511093	0.0322542650500498	-2.67137271779629
msr1	-1.14798511498454	5.83462624823385	-3.14386393429096	0.00480050153333133	0.0322542650500498	-2.67178926661778
sh2d2a	-0.614632448728902	6.51550000400136	-3.14341169398411	0.00480556203745903	0.0322707563502468	-2.67279335255382
cap1	-0.592864472146807	10.1277038930383	-3.14126430384596	0.00482966156292845	0.0324150130806195	-2.67756038017337
brinp3	1.11739764646971	1.08855641808207	3.1402527084921	0.00484105488182922	0.0324738800659215	-2.67980562945321
rc3h1	0.594365278295603	5.95096767216579	3.13825835367738	0.0048635929734864	0.0326074021606292	-2.68423135906841
hla-g	-0.726705844847494	10.7231956452185	-3.13754031783513	0.00487173228521965	0.0326152748491183	-2.68582452329502
ms4a6a	-1.25282954485281	10.2774224116773	-3.13752841383572	0.00487186733426734	0.0326152748491183	-2.6858509345473
tcirg1	-0.84047236282303	7.39008167295798	-3.1372333885283	0.00487521550862605	0.0326152748491183	-2.68650549183127
mc3r	-1.33076886785623	4.76572907911174	-3.13712203260786	0.00487647983997885	0.0326152748491183	-2.68675254560539
ly6e	-1.07089747512912	7.089086712469	-3.13686018292767	0.00487945412251931	0.0326152748491183	-2.68733347165571
sppl2b	0.797626104488446	4.39755428497875	3.13676194068454	0.00488057048335752	0.0326152748491183	-2.6875514222338
spata6	1.23847107213623	4.10468410790135	3.13500132717775	0.00490061889170987	0.0327313445865985	-2.69145692579296
nlgn4y	1.85768144471424	3.82606823723279	3.13472464274246	0.00490377678016949	0.0327313445865985	-2.69207061214081
kcna1	-1.01013262234849	4.72385110119943	-3.13449753005961	0.00490637036127165	0.0327313445865985	-2.69257433357442
ndufa1	-0.673984561626545	9.22321468100147	-3.13431006044472	0.00490851222622251	0.0327313445865985	-2.69299011921339
fry	0.679774340994095	5.45087043601062	3.13269273691671	0.00492702795913335	0.0328288514074817	-2.69657677746206
mrm2	-0.578088517883334	6.61763047287889	-3.13256990424936	0.00492843695118375	0.0328288514074817	-2.69684914984379
minpp1	-0.799016554470231	6.38536512306916	-3.13089345185763	0.00494770624637962	0.0329394873381284	-2.70056617034364
hnrnpr	0.558995096300878	8.98043701331856	3.12997699090525	0.00495827091684016	0.0329920842360192	-2.7025978354802
spc25	-0.910556179781671	4.19263264746733	-3.12876592217838	0.00497226520256999	0.033067432869723	-2.70528227162427
nutf2	-0.583037852340114	7.44876321344703	-3.12760564136342	0.00498570844316587	0.0331390379236301	-2.70785377606724
znf267	-0.661079600286066	6.53854565098639	-3.12675168265683	0.00499562502373357	0.0331871376979039	-2.70974616287554
cxcr3	-0.989717417298266	4.2405633454756	-3.12622854411521	0.00500170937961036	0.0332097411515899	-2.71090535326571
sync	-0.727153474813139	5.50695316065585	-3.12530373934247	0.00501248284487825	0.0332634378714509	-2.71295439734181
fasn	0.718348664094945	4.31890393473722	3.12376257061685	0.00503048648468506	0.0333650316764087	-2.71636859496406
aven	0.580763151482382	6.54202189103462	3.12254679975114	0.00504473299025439	0.0334356958660579	-2.7190614931231
tars	0.567363694914312	7.57154823788929	3.12239275613985	0.0050465408684214	0.0334356958660579	-2.71940266791644
gemin6	-1.18157075916271	5.36550540666688	-3.12046831972009	0.00506917919461447	0.0335677251159952	-2.72366437618834
bcl7a	1.00862035684726	4.95899011919676	3.11983432052697	0.0050766587937049	0.0335992869280854	-2.72506817035374
rpl3	0.307033234105552	12.3387751267607	3.11888135417752	0.00508792147933825	0.0336302134308613	-2.72717802074959
znf529	-0.556312989338657	4.3568657890219	-3.11884070920768	0.00508840238086463	0.0336302134308613	-2.7272680027092
nop14	0.505257209671982	7.13182894664325	3.11874971835093	0.00508947912213793	0.0336302134308613	-2.7274694414611
cyp26b1	0.842016377443679	6.81497558941022	3.11659229485779	0.00511507363448391	0.0337813103017676	-2.73224498711593
bmerb1	0.737133028872067	7.560680532138	3.11332825684864	0.00515403308049389	0.0340092080638632	-2.73946775187957
foxo4	0.969693193714875	4.56558641746664	3.11321665858646	0.00515537017128302	0.0340092080638632	-2.73971465055634
tmem131l	-0.463329722217583	6.62868782482654	-3.11301220813478	0.0051578206205229	0.0340092080638632	-2.74016696583252
coq9	-0.442619393464255	7.36604190076626	-3.11048458841035	0.00518820864723648	0.0341913718354068	-2.74575802899756
lilra1	-1.05014033086372	3.6755710898752	-3.11013967790054	0.00519236868718016	0.0342005858794425	-2.74652083633483
f8	0.543310980620327	7.44244282985858	3.10938300999085	0.00520150631721913	0.0342425585997472	-2.74819418039801
lamc1	0.595475289033875	8.96514237872399	3.10780543401871	0.00522060734730478	0.034350042923313	-2.7516824477204
fam102a	-0.779567950595074	7.15089740529658	-3.10757123344562	0.00522344878075255	0.0343504865916404	-2.75220024583214
mchr1	-1.84454769163648	5.0817733126055	-3.10620796896039	0.00524001824600742	0.0344411602655572	-2.75521402323032
srebf1	0.866324060713831	7.56526019764669	3.10589352210177	0.00524384731503552	0.0344480431310795	-2.75590910314518
ipp	-0.421596902920654	5.52572310905027	-3.10509154649853	0.00525362534211705	0.0344939780548438	-2.75768173935226
pxmp2	0.805188879213349	5.99779734233041	3.10476217784766	0.00525764624537939	0.0345020845026672	-2.75840970568831
tceal4	0.656604280548729	9.02753772896369	3.1044063461863	0.00526199354776477	0.0345123231472304	-2.7591961279413
kat5	0.514815838643708	7.80681787509937	3.10403078997607	0.00526658559765321	0.0345189886766687	-2.76002610696163
vapb	-0.648046775729619	5.19855620020857	-3.10386736611131	0.00526858504392344	0.0345189886766687	-2.76038726194243
sf1	0.762499169560019	7.97682146816453	3.10259466874359	0.00528418126063587	0.0345922029091681	-2.76319958921173
casp8	-0.727938879844318	6.18965844375191	-3.10249971306944	0.00528534667723056	0.0345922029091681	-2.76340939911196
dnaja1	0.602942775772012	9.67535872493194	3.100571134964	0.00530907043929568	0.034729117406127	-2.76767018264961
chpf2	-0.765060416004763	6.8192096123526	-3.09968735210698	0.00531997633751424	0.0347811675421023	-2.76962238273501
adam22	0.529432373081634	3.27936146776977	3.09931815392486	0.00532453865566852	0.0347811675421023	-2.77043784812149
ankrd28	0.791009966169331	7.68859697998414	3.09924413902025	0.00532545373979052	0.0347811675421023	-2.77060132395559
pcif1	0.624699754385772	5.99642869420145	3.09857587424605	0.00533372271902312	0.0348168099260217	-2.77207724631863
kcnj2	-0.801542147367837	6.7333178501003	-3.09801435355871	0.00534068045425086	0.0348342079725139	-2.77331732286063
cbfa2t3	-0.523278573855333	5.99573993583961	-3.09777569554036	0.00534364029094031	0.0348342079725139	-2.77384435583788
gal3st4	-0.688808157697878	7.12033686479304	-3.09768002881889	0.00534482719436134	0.0348342079725139	-2.77405561418927
eif4e2	-0.501210245979011	6.67988524228492	-3.09742488790876	0.00534799388321575	0.0348365114444296	-2.77461902334108
ccdc86	0.463714269767988	7.65419751818015	3.09462512836227	0.0053828624322288	0.0350452079381121	-2.78080038761857
srsf8	0.366453445693831	7.92702034773189	3.09384293870929	0.00539264308825662	0.0350686898434779	-2.78252694695613
pex7	0.849318677288256	5.21174334031665	3.09375437513774	0.00539375158581761	0.0350686898434779	-2.78272242664722
chrm3	1.16920845429195	5.15605197378558	3.09365743289382	0.00539496520647867	0.0350686898434779	-2.78293639754325
fcer1g	-0.932599935255841	9.86409767546454	-3.09300663695711	0.00540311935516511	0.0351032670383051	-2.78437276903017
nup42	-1.07752391425873	5.99831463407952	-3.09227106976793	0.00541234997235574	0.0351447979589308	-2.78599610255175
znhit6	0.551256018698128	7.03871543994403	3.09186036542592	0.00541751051501216	0.0351598703917168	-2.78690242862761
snai1	1.28013700089474	5.82707596386285	3.09124561563039	0.00542524378886349	0.0351819693875259	-2.7882589496104
znf862	-0.936610915303491	4.55928617660725	-3.09113806051445	0.00542659787855725	0.0351819693875259	-2.78849627277387
fam110b	0.822707083099014	6.50867892778773	3.08912462269194	0.00545200682633307	0.0353282054057992	-2.79293840249352
cutc	0.728471370438468	7.70335004172325	3.08815140116189	0.00546432971489228	0.0353895370604137	-2.79508517348193
krt35	-0.75484097400126	4.7950537299	-3.0876683808249	0.00547045567751177	0.0354106914033603	-2.79615054444879
nr4a3	1.03502472007868	5.20857035836834	3.08575946628382	0.0054947306512151	0.0355492422434674	-2.80036031573245
trim2	0.658331769816412	4.49142870785579	3.08501033032792	0.00550428552417042	0.0355924635226122	-2.80201213335192
dnajb4	0.86738272229845	6.22487170769035	3.08473724194204	0.00550777262398023	0.0355964240097846	-2.80261424567748
zbtb14	-0.803875406110961	4.56085292878984	-3.08383333580676	0.00551932993114888	0.0356525104524864	-2.80460705764235
syndig1	-0.77984251252891	5.93435558206561	-3.08346519618654	0.00552404365448672	0.0356643548349891	-2.80541861963903
slc23a2	-0.506131060037153	5.48851612305947	-3.08311011945891	0.00552859379938823	0.0356751313276834	-2.80620134985045
mknk1	-0.393193350928914	8.71447617878988	-3.08248010528188	0.00553667604607893	0.0357069232223391	-2.80759006755416
tgm3	0.788642968781589	5.31616741450854	3.08227671611411	0.00553928769362137	0.0357069232223391	-2.80803836809342
stambp	-0.532022729111723	7.61185950603751	-3.08171352551794	0.00554652562847893	0.0357349775533062	-2.80927966707646
snx6	-0.763233266212969	8.0682310070487	-3.08074700355125	0.00555896832013747	0.0357855667354777	-2.81140972751645
entpd3	0.662442499251065	5.72655434360667	3.08065473942893	0.0055601575061826	0.0357855667354777	-2.81161304971218
a4galt	0.976767546611583	5.71029946345897	3.0802774005438	0.00556502355735448	0.0357860897291469	-2.81244456637654
pemt	1.21528860916018	5.15869653747867	3.08000601330998	0.00556852582780587	0.0357860897291469	-2.81304258055445
smyd2	-0.463121176120105	6.42492859924044	-3.07997636447063	0.0055689085769253	0.0357860897291469	-2.81310791191756
mapk1	-0.510105926130346	7.11951025000053	-3.07966453584505	0.00557293563950995	0.035793393166002	-2.81379501338686
ccl13	-0.930284543555302	5.61968638787473	-3.0792799205426	0.00557790656527974	0.0358067480548776	-2.81464246095693
mroh7	-0.785113421256286	4.29579461510889	-3.07894917344839	0.00558218469789838	0.0358109111442416	-2.81537118514814
hip1	0.43333692512833	6.14737770766088	3.07878271720073	0.00558433896628689	0.0358109111442416	-2.81573792149082
tep1	-1.27597185447969	1.70707858777803	-3.07747402977003	0.00560130390398901	0.0359011108918716	-2.81862095901847
atg4a	-0.433962938124218	7.1930953346241	-3.07708160327518	0.00560640074027437	0.0359151890154255	-2.8194853836247
pdgfc	-0.782154020015577	9.33086444252958	-3.07590527900669	0.00562170566932057	0.0359946128765236	-2.82207630237954
fem1b	0.505366231759363	5.88536686342351	3.0756353412292	0.00562522346059399	0.0359985230555738	-2.82267080202795
tead3	1.07018734002176	5.77763941908431	3.07434674906122	0.00564204550251094	0.0360875255462773	-2.82550846991951
dnal4	0.578607146892739	5.29818050116265	3.07246185921373	0.00566673941472214	0.0362122262016422	-2.82965845679225
wdr46	0.992572661473563	3.46346850140762	3.07241228249909	0.00566739032373275	0.0362122262016422	-2.82976759741184
lgals9	-0.679319918581422	6.9560254507544	-3.07144880250408	0.00568005450082097	0.0362658016740985	-2.83188851637006
fli1	-0.729639970012672	6.68067753906748	-3.07132889487068	0.00568163250002027	0.0362658016740985	-2.83215245259295
bub1b	-0.935004204207429	5.33183208313987	-3.06909257216675	0.0057111403905272	0.0364353691168977	-2.83707424220704
asxl1	0.355490018028108	7.35982640222559	3.06842257071715	0.00572000968450677	0.0364699569310575	-2.83854854194239
arpc5l	-0.604716026958958	8.24095997275088	-3.06810533048401	0.00572421385616491	0.0364699569310575	-2.83924656794436
wbp11	0.51697594566301	7.62030268654656	3.0680160610082	0.00572539742178598	0.0364699569310575	-2.8394429832489
arhgef10l	-0.44814610801815	7.87393720859819	-3.06651255482947	0.00574536692784549	0.0365783437879233	-2.84275074657536
enpep	-0.684593390389853	4.59600677495173	-3.06621441563051	0.00574933477352512	0.0365847957351293	-2.84340658894724
kif15	-1.00068322943703	4.64555455862217	-3.06555464120424	0.00575812491232983	0.0366219110371753	-2.84485786453586
cyb561	-0.413794564523373	6.98361856459564	-3.06523251087162	0.00576242134476141	0.0366304227475259	-2.84556639640919
eif3b	0.637823996567699	8.37488395097199	3.06449268851125	0.00577230047649927	0.0366743954851157	-2.84719354192248
fam171a1	-0.562295512842643	7.71268249238451	-3.06382141651043	0.00578127836084988	0.0367125999704636	-2.84866978929958
fgfr1op	-0.486042604994418	4.85305634413702	-3.06162234541924	0.00581078410616955	0.0368810556569439	-2.85350507123283
btg4	-0.861189879702905	1.95948140006432	-3.05952147202196	0.00583910788511366	0.0370309438648476	-2.85812319158984
p2ry10	-1.84280516633023	2.91270545456528	-3.05929854025863	0.00584212123055776	0.0370309438648476	-2.85861316655881
dpp4	1.70168290693088	5.07493493207112	3.05920610570714	0.00584337109843432	0.0370309438648476	-2.85881632162959
usp12	0.686296450925775	5.43700086229008	3.05827200534501	0.0058560161538543	0.0370920961806536	-2.8608691791912
hnrnpu	0.501641361274734	5.61326843847426	3.05741116393324	0.00586769284802249	0.0371451980583422	-2.86276082291358
ppp1cb	0.488098900417596	7.73131490530015	3.05721188331447	0.00587039914400191	0.0371451980583422	-2.86319870002568
mpped2	0.907325085749034	4.1652333471396	3.05596231914982	0.00588739608235718	0.0372337209845909	-2.86594410277744
gpx7	-0.521136095202953	6.89300938775716	-3.05526348297612	0.00589692253185658	0.0372749319611945	-2.86747931874199
kiaa0100	-0.501097014503879	7.16394048361565	-3.05293997712203	0.00592870322902405	0.0374567000433698	-2.87258266354462
hoxb7	-0.645210534049123	6.29016650436795	-3.05150890209484	0.00594835942572692	0.0375564810474608	-2.87572512761336
tmem8a	-1.0680040667406	6.12948190022489	-3.05134878856951	0.00595056253049489	0.0375564810474608	-2.87607668168368
fosl1	2.65637632548492	4.61336464474193	3.04873507652041	0.00598663766240573	0.0377635405302947	-2.88181448127283
f2r	-0.903891042043079	6.21376156494251	-3.04853058955507	0.00598946891718475	0.0377635405302947	-2.8822633046615
gemin4	1.00410252970191	4.60501073851249	3.04820128467926	0.00599403106927794	0.0377730721276685	-2.88298606325247
kntc1	-1.25096913922097	4.37054943042416	-3.04731401973249	0.00600633980857141	0.0378313864951881	-2.88493328223361
slc2a3	1.60033588305882	7.55939382319181	3.04675067337806	0.00601416756785498	0.0378561217109022	-2.88616950526852
ppp1r3c	0.98802824259803	8.05035838315485	3.04659149643212	0.00601638112953691	0.0378561217109022	-2.88651879153783
thbs3	-0.653943539193726	7.73643531028757	-3.04626959835408	0.00602085993867362	0.0378650627834411	-2.88722511951635
tagln2	-0.844000473683257	9.987593287225	-3.04580280711164	0.00602736046271368	0.0378867028476058	-2.88824932920844
smc6	-0.431924142191899	6.46438571334932	-3.04535712119295	0.00603357338497419	0.0379065140670398	-2.8892271737387
hyal1	0.909340825643079	6.14604140101608	3.04469075644504	0.00604287411145788	0.0379456947881252	-2.89068908860018
slc1a5	0.56185518662776	6.51347252067467	3.04171918117187	0.00608451801970938	0.0381878290106747	-2.89720681013014
ndufa3	-0.577066161335167	8.15626906546962	-3.04081140763062	0.00609729467102066	0.0382486321738849	-2.89919738585927
cd68	-0.654022846778433	6.77701337840997	-3.0401311439854	0.00610688612274912	0.0382894029660772	-2.90068892348833
septin8	-0.750606381333593	5.66020821954727	-3.03978220537292	0.00611181165895469	0.0383008925975891	-2.90145395142783
pdgfd	0.918188351836511	9.4242801787811	3.03850063791157	0.0061299348249916	0.0383950343641229	-2.90426342050872
lyzl6	-0.814897056579726	5.46388312317671	-3.03827984370577	0.00613306238833247	0.0383952030104757	-2.90474740174149
pink1	0.421653616828889	8.22783290496465	3.03800168301587	0.00613700473935505	0.0384004697763687	-2.90535711082914
znf587b	-0.501380477803012	6.50880059033469	-3.03712552000995	0.00614943849240688	0.0384588367936739	-2.90727745720312
ammecr1	-0.543281108592752	5.86490467178629	-3.03659924949873	0.00615691853158563	0.038486179796378	-2.90843081612912
tmem176a	-0.910636682155559	9.50270110869889	-3.03495521280308	0.00618034220249594	0.0386131067071177	-2.91203333451822
qdpr	-0.646452761082023	7.56150020515151	-3.03452022048671	0.00618655416749404	0.0386324257468879	-2.91298638968335
tes	-0.382247556701912	8.10449765471221	-3.03392680184739	0.00619503825784724	0.0386659066264729	-2.9142864658559
znf358	0.733563549023756	6.25296065909845	3.03325354936518	0.00620467729754546	0.0387065586778365	-2.91576132327721
tmem258	-0.469060462049633	10.3763725619495	-3.03046337028615	0.00624477881297024	0.0389192264372235	-2.92187224665519
ntan1	-0.694741163939855	7.64892916732213	-3.03044428722633	0.00624505393933321	0.0389192264372235	-2.92191403390006
eif2ak3	0.799441877741803	7.91891400458518	3.02967857505898	0.00625610308247107	0.0389657050979065	-2.92359067137432
rpl23a	0.297317745300397	12.7847231035732	3.02949150006834	0.00625880541385253	0.0389657050979065	-2.92400027378655
ubxn1	0.681955909810156	6.10321018923236	3.02913595374232	0.0062639444415831	0.0389676433637257	-2.92477871831817
pgam1	-0.38503527691134	10.1162932180911	-3.02893995998708	0.00626677905065776	0.0389676433637257	-2.92520781796681
nfic	0.727892177608538	6.71180198334371	3.02881704683398	0.00626855734317544	0.0389676433637257	-2.92547691275729
ccn5	0.952609324931874	10.1116553502765	3.02783444250281	0.00628279101970848	0.0390365284480934	-2.92762798209866
siglec9	-0.884694368836843	4.06838837389353	-3.02681840577238	0.00629754170609184	0.0391083370517646	-2.92985195098588
atf6b	0.441160284555354	7.09320796799456	3.02660357786995	0.00630066481614071	0.0391083370517646	-2.93032214295043
il18	-1.56150541505445	5.40501553318922	-3.02606308989443	0.00630852888040104	0.0391375316262555	-2.93150504611369
clip1	0.480282184281595	7.74725723381842	3.02371019617927	0.00634287356156799	0.0393308980034534	-2.93665357984585
fhl3	-0.55972134461436	6.33652924961002	-3.02078278696032	0.00638585562994006	0.0395776027355094	-2.94305704295422
ctsl	-0.676221962057504	9.95106605228961	-3.0183805639233	0.00642133584843698	0.0397775897004478	-2.94830987142645
[truncated: 10,384 more rows]
