# Supplementary material for: Analysis of Differentially Expressed Genes in Osteonecrosis of Femoral Head, Osteoarthritis, and Rheumatoid Arthritis by Integrated Microarray Analysis
Source: Research Square preprint supplement (doi:10.21203/rs.3.rs-877622/v1), 2021-10-22
Supplement: Supplementary file 5 [file 797af74cab163780ec8c18c3.csv]

Top 20 in network string_interactions 74089 55235.tsv ranked by MCC method
Rank	Name	Score
1	COL1A2	5393042.0
2	COL1A1	5390754.0
3	COL3A1	5346048.0
3	COL5A1	5346048.0
5	COL5A2	5254602.0
6	MMP1	4941516.0
7	VEGFC	4515864.0
8	SPP1	4441843.0
9	THY1	4153681.0
10	SDC1	4112670.0
11	MMP13	4037214.0
12	FAP	1049064.0
13	LOXL1	822960.0
14	OGN	622848.0
15	LRRC15	488892.0
16	MXRA5	367944.0
17	ANTXR1	202321.0
18	OLFML2B	162720.0
19	MYOC	96482.0
20	DPYSL3	45384.0
