# Supplementary material for: Analysis of Differentially Expressed Genes in Osteonecrosis of Femoral Head, Osteoarthritis, and Rheumatoid Arthritis by Integrated Microarray Analysis
Source: Research Square preprint supplement (doi:10.21203/rs.3.rs-877622/v1), 2021-10-22
Supplement: Supplementary file 6 [file f3fc6a12187c89cfdbe47d4b.xlsx]

## Sheet: Sheet1
GENE	GSE123568ONFH logFC	GSE123568ONFH adj pvalue	GSE55457OA logFC	GSE55457OA adj pvalue	GSE55457RA logFC	GSE55457RA adj pvalue
COL1A2	0.2084	0.000207785	-0.0494696	0.0475226	-0.224972	0.02508
COL1A1	0.232858	0.00229982	0.470248	0.0271635	-0.053625	0.0449739
COL3A1	0.0990719	0.01064	-0.00706452	0.0495938	-0.52114	0.0067559
COL5A1	0.278289	0.000161474	-0.138866	0.0435267	-0.526941	0.00870802
COL5A2	0.181901	1.80931e-05	-0.173087	0.04034	-0.382278	0.0111806
MMP1	0.161942	0.183706	-1.31158	0.0255666	-2.90692	0.000416305
VEGFC	0.377037	0.0386676	-0.758399	0.0118235	-0.154942	0.0334201
SPP1	0.0517827	0.733151	-0.6753	0.0268998	-1.17059	0.00293676
THY1	0.260517	0.00130733	-0.599622	0.0246069	-0.703001	0.00652199
SDC1	0.417822	0.0106545	-0.618664	0.0200503	-2.25028	6.52728e-06
MMP13	0.141941	0.00306657	-0.209782	0.0448201	-2.57354	0.000293352
FAP	-0.00494842	0.944388	-0.846065	0.00731044	-0.762636	0.00129203
LOXL1	0.344388	0.0055298	-0.855623	0.0109519	-1.28654	0.000161602
OGN	0.0816332	0.0148606	-1.081	0.00534833	0.110456	0.0439788
LRRC15	0.24233	0.000209839	-1.54587	0.00625643	-2.38681	0.000994384
