# Supplementary figures and images for: Analysis of Differentially Expressed Genes in Osteonecrosis of Femoral Head, Osteoarthritis, and Rheumatoid Arthritis by Integrated Microarray Analysis
Source: Research Square preprint supplement (doi:10.21203/rs.3.rs-877622/v1), 2021-10-22

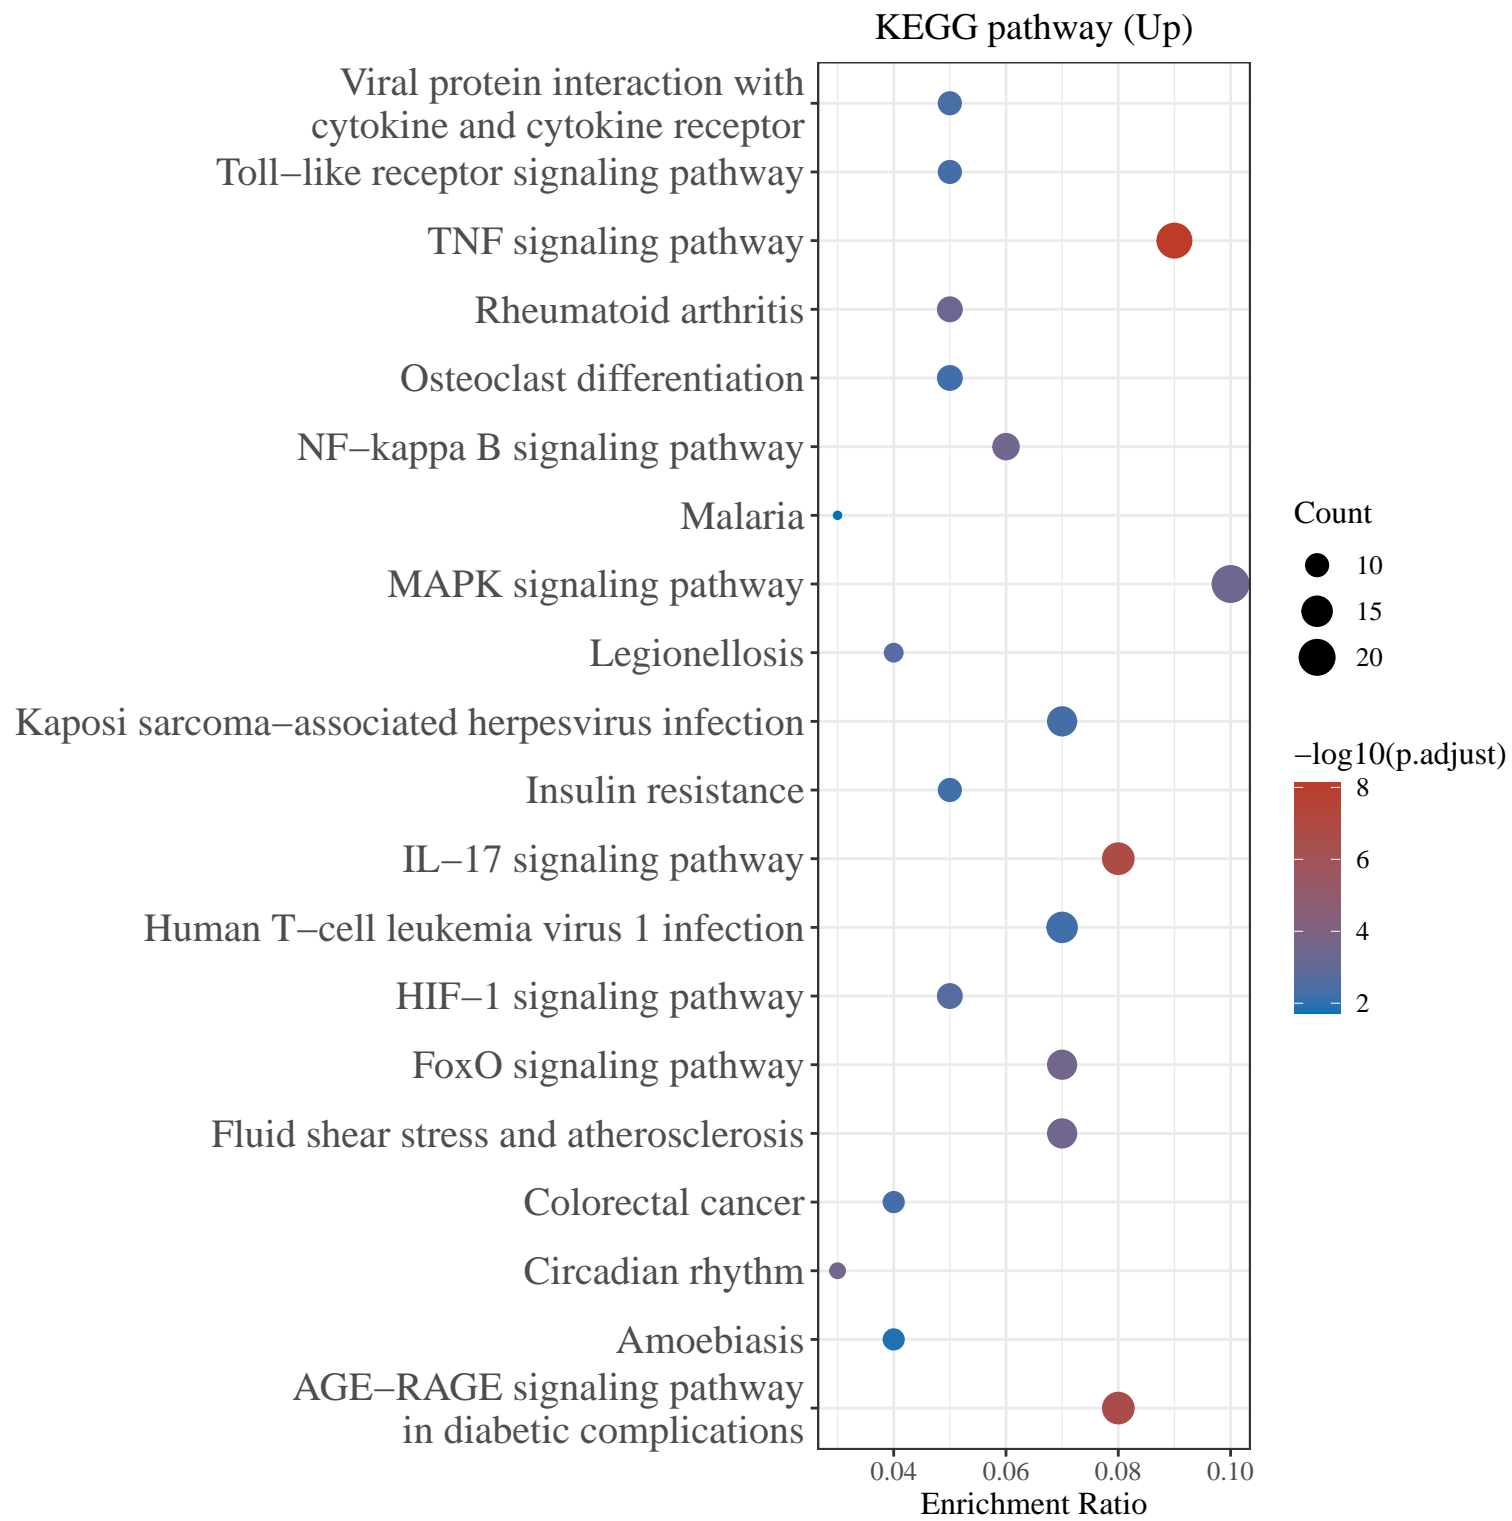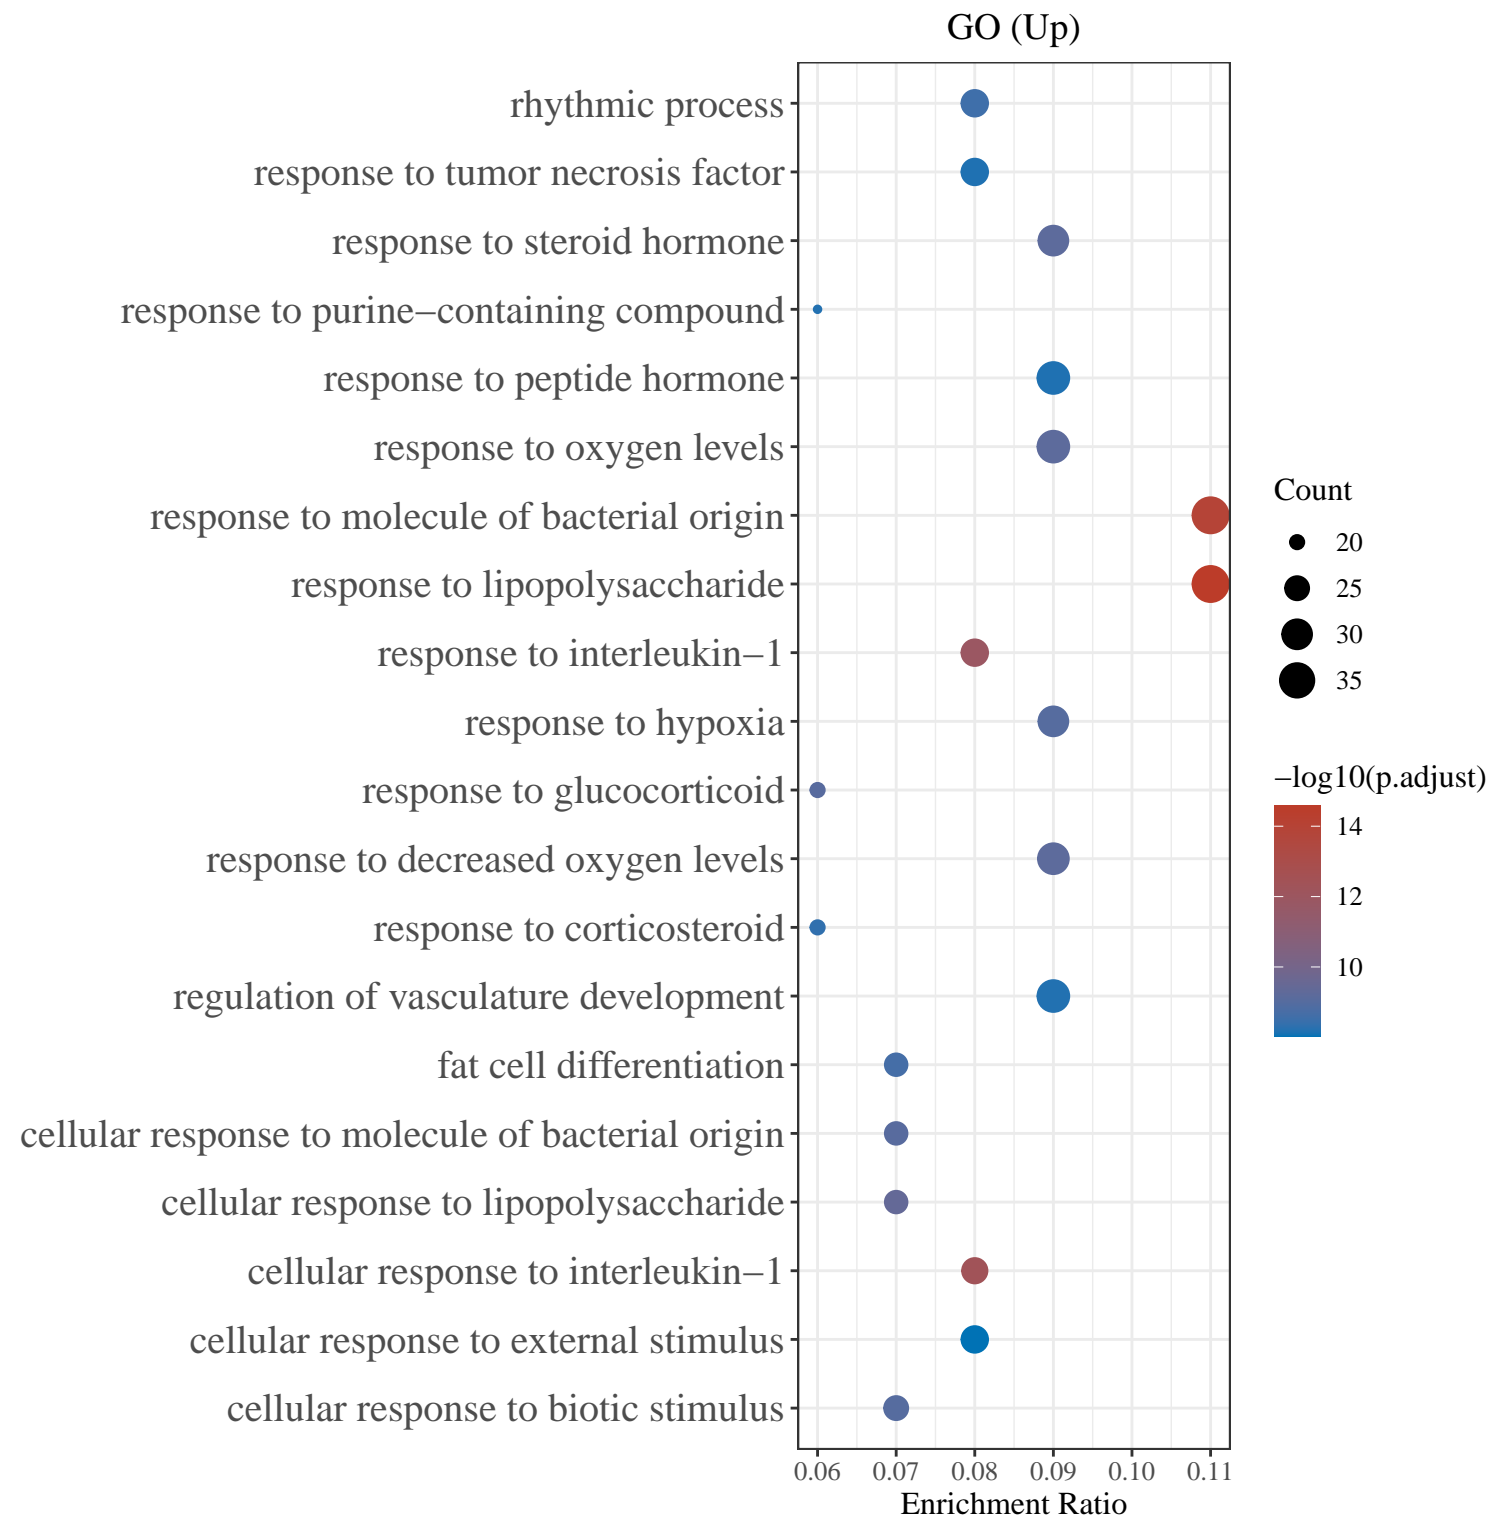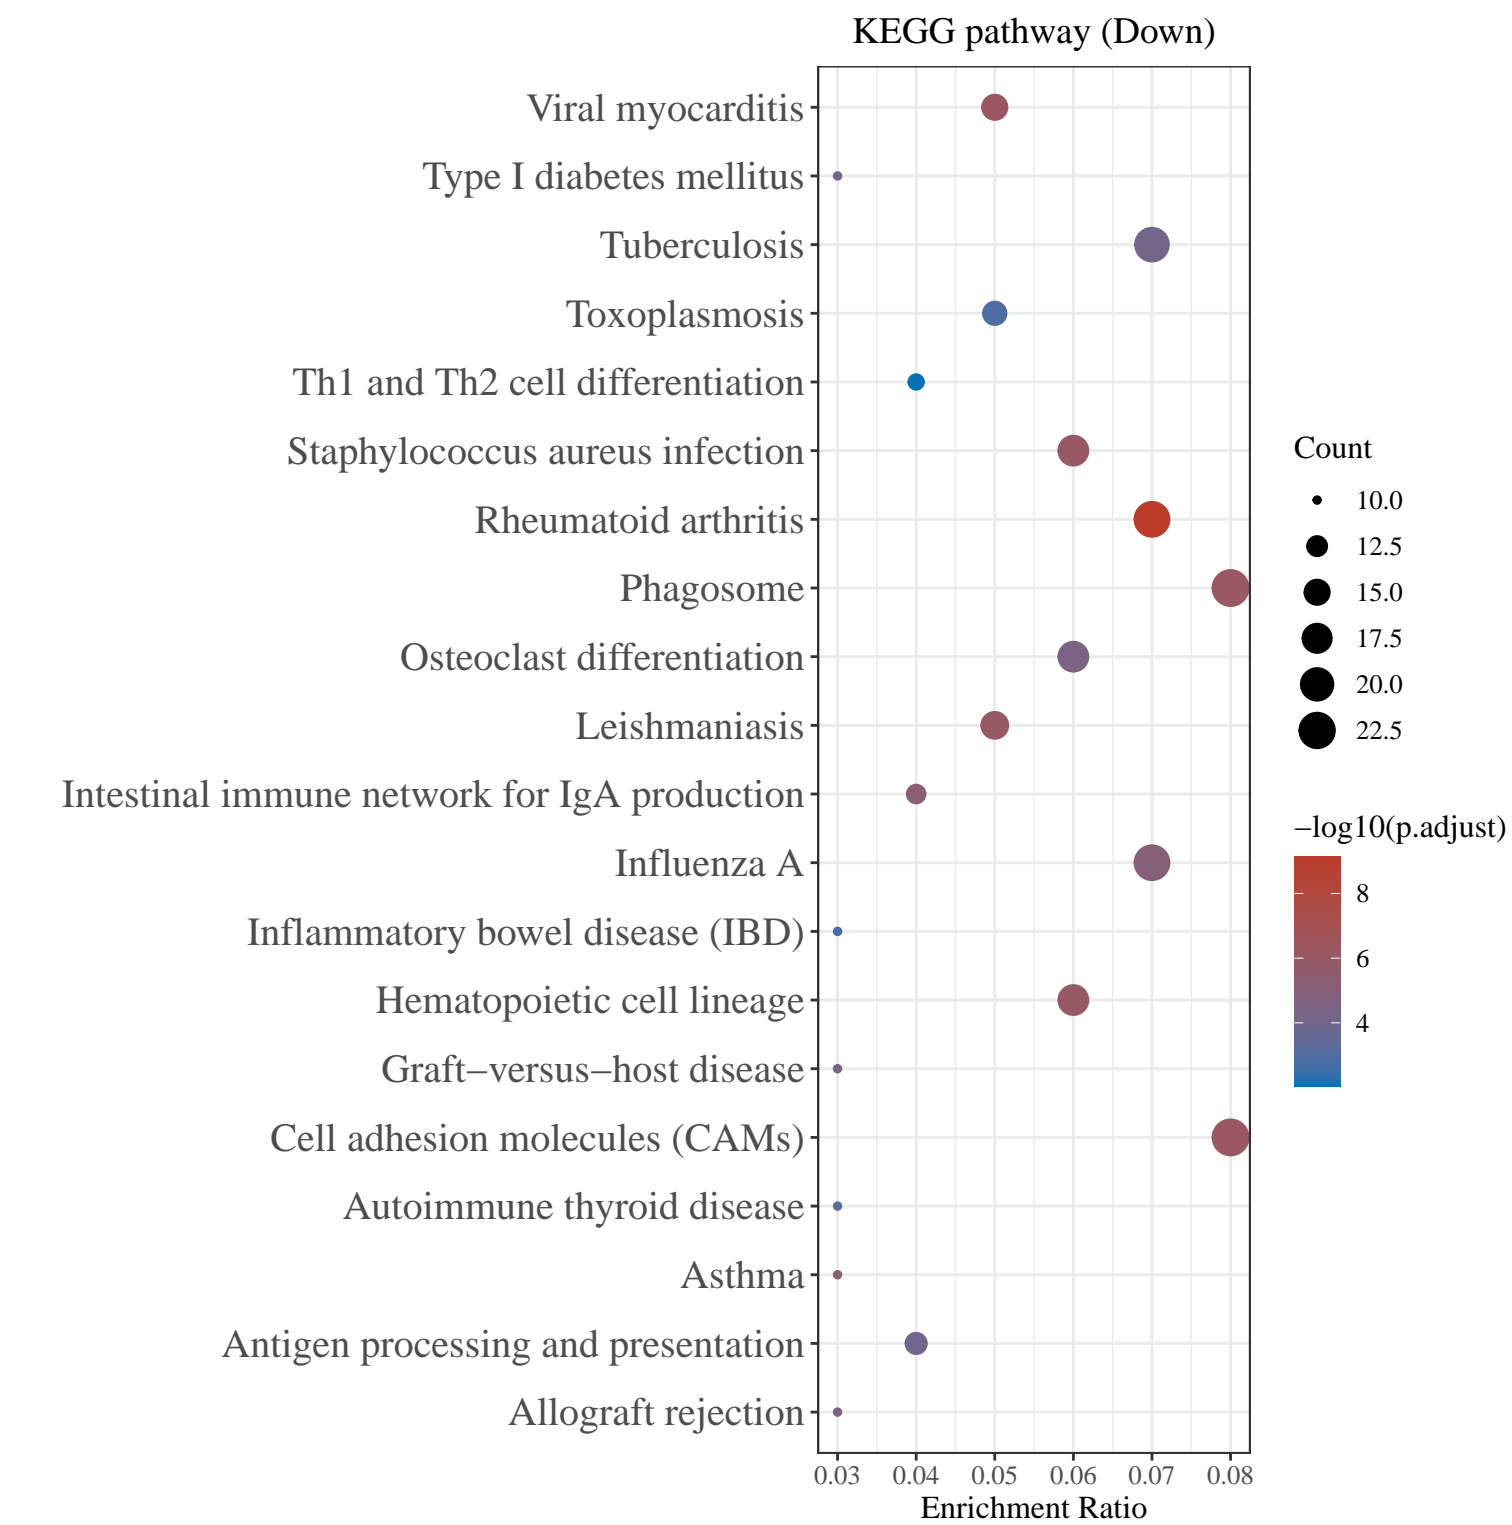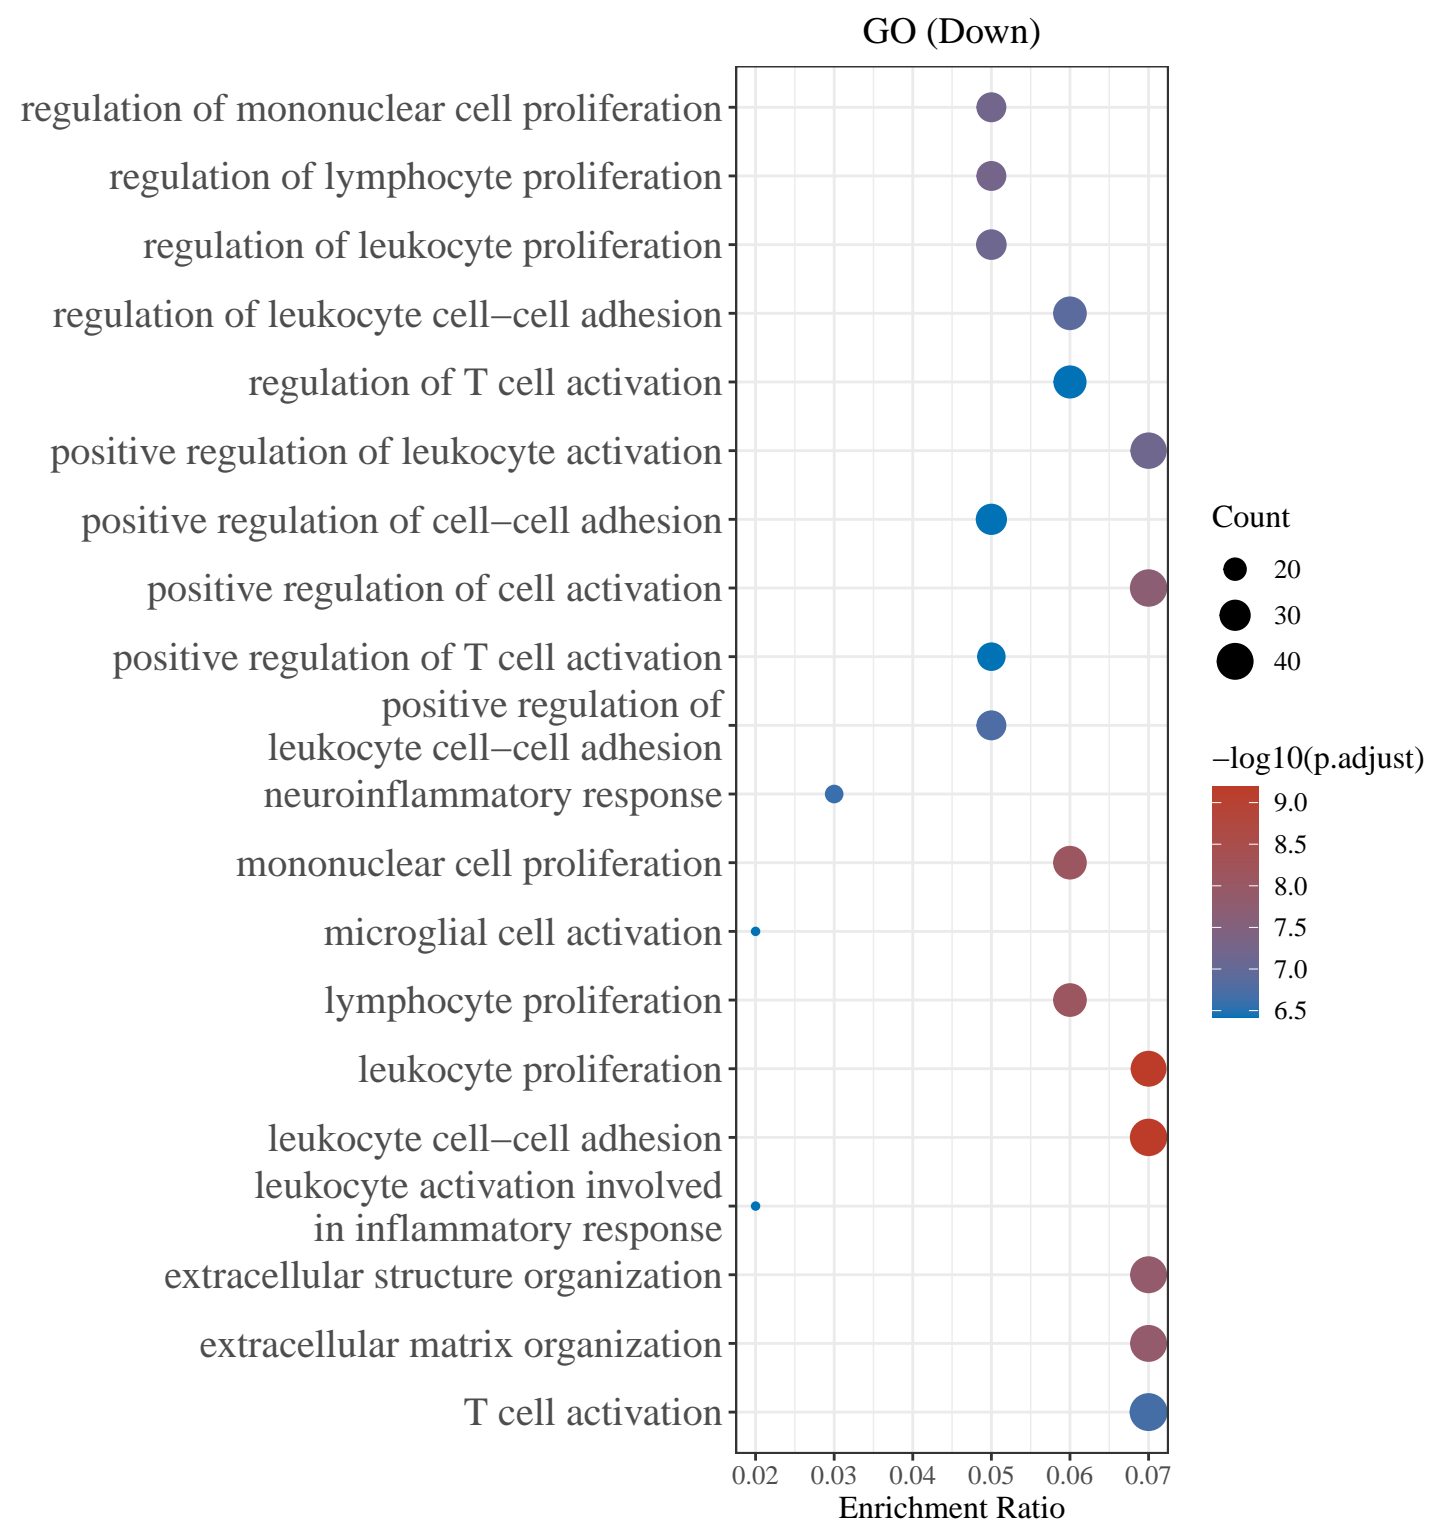

Supplement: Supplementary file 1 [file ee69e4febbf88081fc7ee2ee.pdf]
